# Supplementary material for: Recurrent mutations in the U2AF1 splicing factor in myelodysplastic syndromes
Source: Springer Nature journal article supplement (doi:10.1038/ng.1031), 2011-12-11
Supplement: 41588_2012_BFng1031_MOESM25_ESM.pdf [file 41588_2012_BFng1031_MOESM25_ESM.pdf]

**RECURRENT MUTATIONS IN THE *U2AF1* SPLICING FACTOR  
IN MYELODYSPLASTIC SYNDROMES**

Timothy A Graubert<sup>1-3,9</sup>, Dong Shen<sup>4,9</sup>, Li Ding<sup>4,5,9</sup>, Theresa Okeyo-Owuor<sup>1</sup>, Cara L Lunn<sup>1</sup>, Jin Shao<sup>1</sup>, Kilannin Krysiak<sup>1</sup>, Christopher C Harris<sup>4</sup>, Daniel C Koboldt<sup>4</sup>, David E Larson<sup>4</sup>, Michael D McLellan<sup>4</sup>, David J Dooling<sup>4</sup>, Rachel M Abbott<sup>4</sup>, Robert S Fulton<sup>4</sup>, Heather Schmidt<sup>4</sup>, Joelle Kalicki-Veizer<sup>4</sup>, Michelle O’Laughlin<sup>4</sup>, Marcus Grillot<sup>1</sup>, Jack Baty<sup>6</sup>, Sharon Heath<sup>1</sup>, John L Frater<sup>3</sup>, Talat Nasim<sup>7,8</sup>, Daniel C Link<sup>1,2</sup>, Michael H Tomasson<sup>1,2</sup>, Peter Westervelt<sup>1,2</sup>, John F DiPersio<sup>1,2</sup>, Elaine R Mardis<sup>2,4,5</sup>, Timothy J Ley<sup>1,2,4,5</sup>, Richard K Wilson<sup>2,4,5</sup> & Matthew J Walter<sup>1,2,5</sup>

<sup>1</sup>Department of Internal Medicine, Division of Oncology, Washington University, St. Louis, Missouri, USA. <sup>2</sup>Siteman Cancer Center, Washington University, St. Louis, Missouri, USA. <sup>3</sup>Department of Pathology and Immunology, Washington University, St. Louis, Missouri, USA. <sup>4</sup>The Genome Institute, Washington University, St. Louis, Missouri, USA. <sup>5</sup>Department of Genetics, Washington University, St. Louis, Missouri, USA. <sup>6</sup>Division of Biostatistics, Washington University, St. Louis, Missouri, USA. <sup>7</sup>Department of Medical and Molecular Genetics, King’s College, Guy’s Hospital, London, UK. <sup>8</sup>National Institute for Health Research (NIHR), Biomedical Research Centre, Guy’s and St. Thomas’ National Health Service (NHS) Foundation Trust and King’s College London, London, UK. <sup>9</sup>These authors contributed equally to this work. Correspondence should be addressed to M.J.W. (mjwalter@dom.wustl.edu).

## TABLE OF CONTENTS

### A. Supplementary Note

### B. Supplementary Figures

- Supplementary Figure 1. Genomic architecture of UPN 266395 index MDS patient.*
- Supplementary Figure 2. U2AF1 quantitative RT-PCR and global expression profiling.*
- Supplementary Figure 3. Survival analysis in transplanted vs. non-transplanted patients.*
- Supplementary Figure 4. U2AF1 p.Ser34Phe mutation induces splicing alterations in FMR1.*

### C. Supplementary Tables

- Supplementary Table 1. Sequence metrics.*
- Supplementary Table 2. Tier 1-3 validated SNVs.*
- Supplementary Table 3. Tier 1 SNV annotation.*
- Supplementary Table 4. Annotation of U2AF1 mutations.*
- Supplementary Table 5. Clinical characteristics of MDS patients with U2AF1 mutations.*
- Supplementary Table 6. Significantly dysregulated genes in U2AF1 mutant MDS samples vs. controls.*
- Supplementary Table 7. Clinical characteristics of MDS replication cohort.*
- Supplementary Table 8. Primers used for U2AF1 sequencing.*
- Supplementary Table 9. Microarray-based expression of mutated genes.*

### D. Supplementary References

## SUPPLEMENTARY NOTE

**Clinical history of index case (UPN 266395).** The patient was a 65 year old male of European ancestry who presented with anemia and thrombocytopenia (white blood cell count 5,900/mcl, hemoglobin 9.6 g/dl, platelet count 53,000/mcl). A bone marrow biopsy and aspirate showed 60% cellularity with trilineage hematopoiesis, without excess blasts or overt dysplasia. His marrow was felt to be abnormal, but not diagnostic of a myelodysplastic or myeloproliferative disorder. Cytogenetics showed a 46, XY karyotype. He was initially treated with recombinant erythropoietin without improvement, and two months later was referred for evaluation with the following blood counts: white blood cell count 40,300/mcl, hemoglobin 9.4 g/dl, platelet count 33,000/mcl. A bone marrow biopsy and aspirate were repeated (including specimens obtained for tissue banking after obtaining informed consent with specific language authorizing whole genome sequencing which was approved by the Washington University Human Research Protection Office), and showed a 100% cellular marrow, with trilineage dysplasia and 7% blasts, interpreted as MDS/RAEB-1. Cytogenetics again showed a normal male karyotype. His IPSS score was 1.5 (Intermediate-2). At that time, erythropoietin was continued and hydroxyurea was added (1500 mg daily).

One month later, the patient presented with increased fatigue, blurred vision, and dyspnea and was found to have a white blood cell count of 147,000/mcl, hemoglobin 8.9 g/dl, platelet count 36,000/mcl, with 27% circulating blasts. A bone marrow biopsy and aspirate were repeated (including specimens obtained for tissue banking after obtaining informed consent with specific language authorizing whole genome sequencing which was approved by the Washington University Human Research Protection Office). The bone marrow biopsy showed >90% cellularity, with 60% blasts with irregular nuclear contours (NBE positive, largely myeloperoxidase negative). Flow cytometry demonstrated coexpression of CD13 and CD33, with variable expression of CD64 and CD117, most consistent with AML M5b (AML with monocytic differentiation). He received emergency leukopheresis and began 5-azacytidine (160 mg subcutaneously, days 1-7 of 28), for a total of 6 cycles.

Seven months later, the patient developed mental status changes and was found to have leukemic relapse in the central nervous system. He received supportive care until his death 322 days after initial presentation, and 246 days after evolution to secondary AML (sAML).

The patient had a prior history of coronary artery disease, hyperlipidemia, and recurrent pneumonia. There was no significant family history of cancer.

## RESULTS

**Genome coverage.** Individual reads were aligned to the reference genome (NCBI build 36) and only unique reads (deduplicated reads) were used to determine haploid coverage of the genome for the normal and sAML samples (38.23x and 39.12x, respectively, **Supplementary Table 1**). We obtained at least 32x haploid coverage for all autosomal chromosomes in the normal genome and ~half this coverage for chromosomes X and Y, as expected (**Supplementary Fig. 1**). At least 99.42% of the consensus coding DNA sequence (CCDS) was covered by at least 1 read in both genomes (**Supplementary Table 1**). We identified all the heterozygous and homozygous SNPs present in the normal and sAML genomes using the Affymetrix SNP 6.0 arrays and determined diploid coverage for each genome based on the number of these SNPs that were identified using the WGS data, as previously described<sup>1</sup>. Using this approach, we achieved 98.91% and 99.31% diploid coverage of the normal and sAML genomes, respectively (**Supplementary Table 1**).

**Detection and validation of somatic single nucleotide variants and insertions/deletions.**

1281 potential somatic single nucleotide variants (SNVs) and 8801 insertions/deletions (indels) were identified in the sAML genome after filtering out low quality data and variants present in the matched normal genome and previously identified SNPs. These variant calls were prioritized into non-overlapping tiers for downstream validation, as previously described<sup>1</sup>. 1233 SNV predictions were tested using the custom capture approach, of which 507 validated (**Supplementary Table 2**). This represents an overall validation rate of 507/1233 (41%) and 16/38 (42%) for tier 1 high confidence (HC). 16 indel predictions were validated (none in tier 1). 505 of the 507 SNVs (99.6 %) were present in the MDS genome, and 2 were new in the sAML genome (sAML-specific) (**Supplementary Table 2**).

**Copy number alterations and loss of heterozygosity.** Using WGS data, we identified 42 putative amplifications. None of these calls were supported by LOH analysis and there were no instances of copy number neutral LOH (**Supplementary Fig. 1**). 4 putative copy number alterations were detected using the Affymetrix SNP 6.0 array data (SNPa). Deep sequencing after solid phase capture of the called sites in the normal, MDS, and sAML samples did not support any of the copy number predictions. Therefore, no confirmed structural variants were detected in this genome.

**Luciferase- $\beta$ -galactosidase double-reporter assay.** Transient co-expression of the pTN24 double-reporter plasmid and the wild-type or p.Ser34Phe mutant U2AF1 cDNA, with or without the Tra2 $\alpha$  splicing enhancer or hnRNPG splicing inhibitor, was performed in 293T cells in 3 independent experiments, with one representative example shown in **Fig. 3a**. Each experiment had 6 replicate data values for each combination of conditions. A significant increase in splicing (as detected by an increase in the luciferase/ $\beta$ -galactosidase ratio) occurred with expression of the mutant U2AF1 compared to wild-type *U2AF1* when co-expressed with pTN24 in 3 experiments ( $P \leq 0.004$ ). Co-expression of the Tra2 $\alpha$  splicing enhancer or hnRNPG splicing inhibitor resulted in increased and decreased splicing of the pTN24 reporter plasmid, as expected, that was independent of wild-type or mutant U2AF1 expression. Experiments were analyzed independently. Transient co-expression of a control plasmid (vector) or the mutant U2AF1 with or without a siRNA targeting the endogenous *U2AF1* was performed in 3 independent experiments, with one representative example shown in **Fig. 3b**. Each experiment had 6 replicate data values for each combination of conditions. A significant increase in splicing (as detected by an increase in the luciferase/ $\beta$ -galactosidase ratio) occurred in all 3 experiments when comparing the vector and U2AF1 mutant cDNAs, independent of knockdown of *U2AF1* ( $P \leq 0.04$ ).

**Alternative splicing of *FMR1*.** The *FMR1* gene, fragile X mental retardation 1, contains several alternative cryptic 3' splice acceptor sites in exon 15<sup>2</sup>. We performed RT-PCR using primers that flanked the cryptic splice sites and measured the relative abundance of splice acceptor site usage, as previously described<sup>2</sup>. We used RNA extracted from 7 unfractionated bone marrow samples harvested from MDS patients with a *U2AF1* mutation and 5 samples from MDS patients without a *U2AF1* mutation. Two independent experiments were performed using cDNA obtained from these samples and results are shown in **Supplementary Fig. 4a**. The splicing ratio is defined as the ratio of mRNAs resulting from the use of an alternative 3' cryptic splice acceptor site located within exon 15 (resulting in 124 or 85 base pair amplicons) compared to the normal splice acceptor site (160 base pair amplicon). There was an increased utilization of a cryptic 3' splice acceptor site in MDS samples harboring a *U2AF1* mutation compared to MDS samples without *U2AF1* mutations ( $p < 0.03$  for both independent experiments,  $p = 0.0001$  for pooled data).

Next, we validated this result by creating a *FMR1* minigene splicing reporter construct using the same genomic locus interrogated in the clinical samples. Each experiment was



repeated with four biologic replicates. The *FMR1* minigene was transiently transfected into 293T cells with a control plasmid (pcDNA3.1-YFP), wild-type U2AF1 cDNA, or mutant (p.Ser34Phe) U2AF1 cDNA in the presence of a control siRNA or siRNA targeting the endogenous *U2AF1*. RNA was harvested 48 hours later and a reverse transcriptase (RT) reaction was performed to create cDNA. Expression of the p.Ser34Phe mutant U2AF1 resulted in an increase in cryptic 3' splice acceptor usage compared to control or wild-type *U2AF1*, independent of endogenous *U2AF1* levels ( $P < 0.04$ ) (**Supplementary Fig. 4b**).

**RT-PCR of U2AF1.** Quantitative RT-PCR of *U2AF1* revealed no difference in the expression levels between mutant and wild-type MDS samples ( $p = 0.73$ , **Supplementary Fig. 2a, left panel**). A dominant RT-PCR product was identified for both wild-type and mutant U2AF1, consistent with isoform “a” expression (**Supplementary Fig. 2a, right panel**). Cloning and sequencing of RT-PCR products obtained from U2AF1 mutant MDS samples UPN 300813 and UPN 571656 revealed isoform “a” by Sanger sequencing (data not shown) and next-generation sequencing (**Fig. 1c**).

**Gene expression profiling.** We compared the expression level of the 30 genes containing tier 1 mutations in our index sAML sample (UPN 266395) with the expression in 43 *de novo* AML samples for which exon array data was available (T. Ley, unpublished data). 28 genes had at least 3 probesets on the array. For these 28 genes, at least one probeset was called present in 27 genes in the sAML case (**Supplementary Table 9**). All 27 genes were also expressed in >50% of the *de novo* AML cases and the one gene not expressed in the sAML case (*POPDC3*) had only 1/13 probesets expressed in ~50% of AML cases (**Supplementary Table 9**). 27 of the 30 mutated genes had probesets in the mutated exon. 14 of these were expressed in sAML (and in *de novo* AML) and 13 were not (vs. 11 absent in >50% of *de novo* AML cases). Overall, the expression pattern of the 28 genes with tier 1 mutations analyzed by microarray was highly similar in the sAML and *de novo* AML samples.

Affymetrix U133plus2 gene expression array data was available for 15 MDS and 4 control samples, as previously described<sup>3</sup>. RNA was extracted from CD34+ purified bone marrow cells for all samples. Array data was generated from the same batch analysis for the 19 samples and 6 of the 15 MDS samples had *U2AF1* mutations. First, we performed unsupervised hierarchical clustering using 19 arrays (4 control, 6 *U2AF1* mutant MDS samples, and 9 *U2AF1* wild-type MDS samples) and observed that clustering of samples was independent of disease or mutation status. When we restricted our clustering analysis to the 4 control and 6 *U2AF1* mutant samples, using 37,552 probesets that remained after removing probesets absent in all samples and using Ward's, UPGMA, or WPGMA clustering algorithms with Euclidean distance, we observed segregation of the mutant samples (**Supplementary Fig. 2b, left panel**). To identify the most significantly differentially expressed genes between control and *U2AF1* mutant MDS samples from the list of 37,552 probesets, we used the Significance Analysis of Microarray (SAM)<sup>4</sup> and Gene Set Enrichment Analysis (GSEA)<sup>5</sup> supervised algorithms. While we found no significant gene sets using GSEA, we did identify 50 probesets that were up-regulated and 351 probesets that were down-regulated in *U2AF1* mutant samples compared to controls with a false discovery rate (FDR) <0.005 (**Supplementary Table 6**). *U2AF1* mutant and control samples segregated by hierarchical clustering when we used 401 SAM defined probesets, as expected (**Supplementary Fig. 2b, right panel**). We analyzed up- and down-regulated genes to identify common pathways based on functional annotation categories (including gene ontology) using DAVID<sup>6</sup>. Nine annotation clusters were identified by DAVID using the 351 down-regulated probesets (300 with unique gene symbols) in *U2AF1* mutant samples that had an enrichment score >2. Three of the 9 clusters contained “mRNA splicing/processing” genes (enrichment score = 2.46) and two clusters with “RRM”(RNA recognition motif) genes (enrichment scores = 3-4.3) involved in splicing (**Supplementary Fig.**

**2c, Supplementary Table 6).** When genes that segregated control samples from *U2AF1* wild-type MDS samples were analyzed in DAVID, “splicing” and “RRM” categories were not enriched, suggesting that down-regulation of splicing and RRM genes is not common to all MDS samples, but instead is associated with *U2AF1* mutations. Collectively, these results suggest that a regulatory feedback loop may exist for mRNA splicing genes when *U2AF1* is mutated.

a

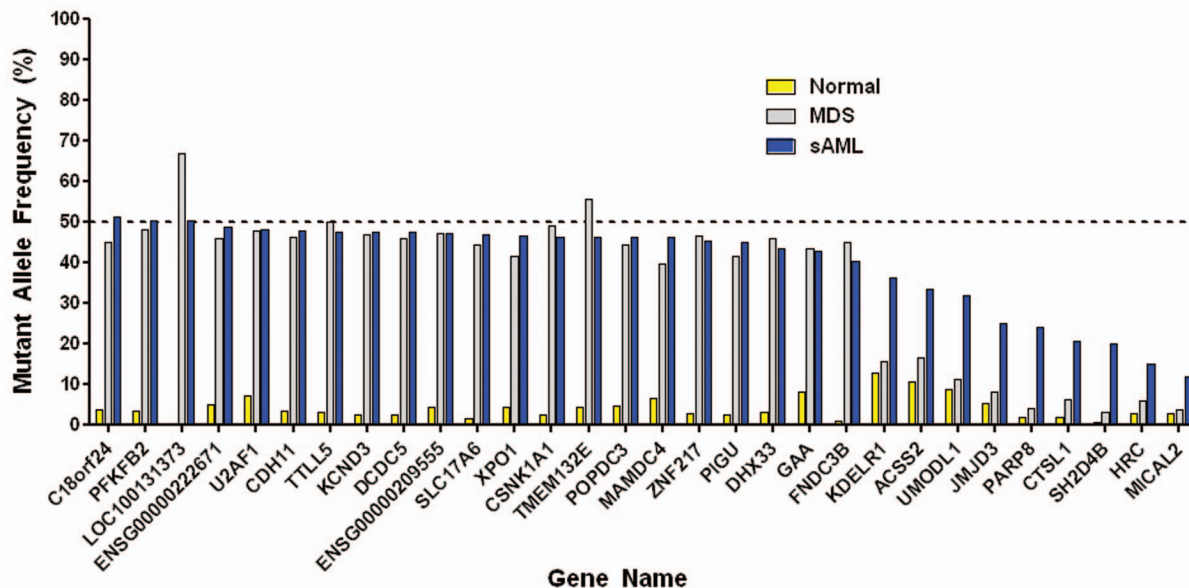

b

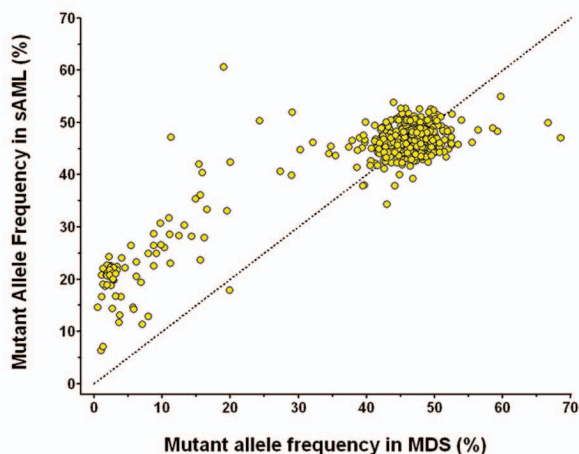

c

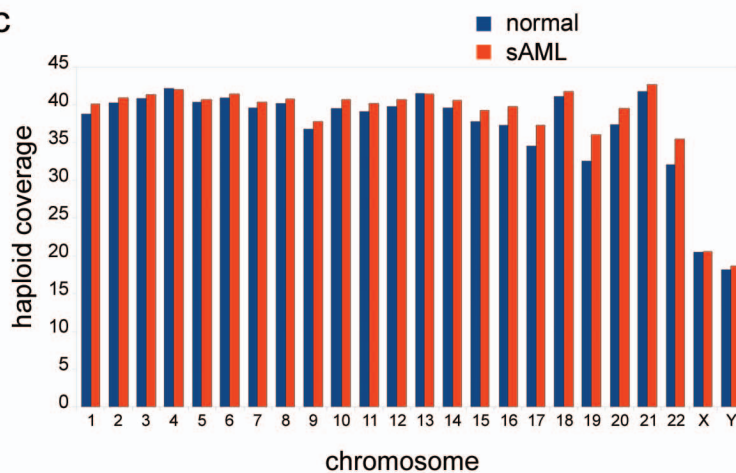

d

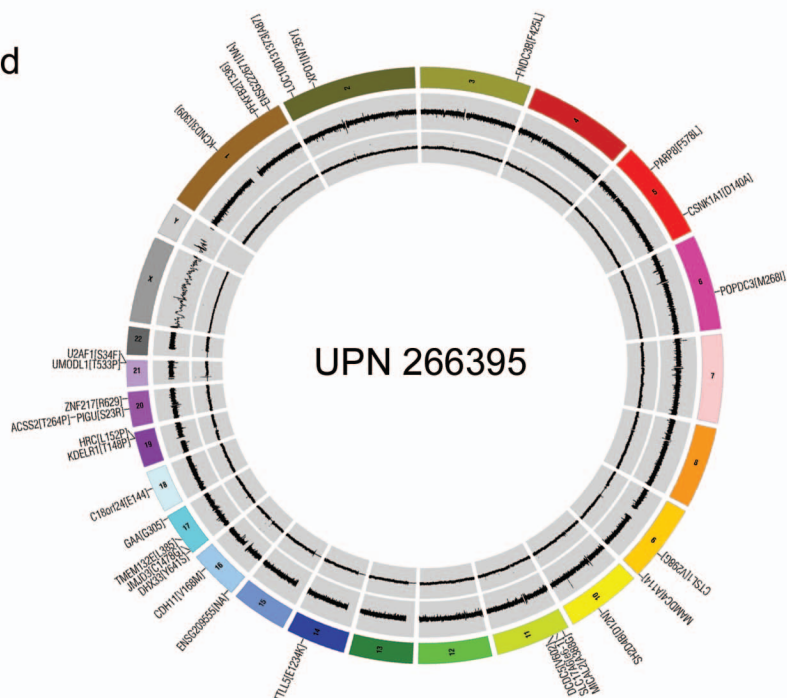

**Supplementary Figure 1. Genomic architecture of UPN266395 index MDS patient.** (a) Mutant allele frequencies of tier 1 SNVs from capture/deep sequencing of normal (skin), MDS, and sAML samples are shown. (b) Mutant allele frequencies of 507 validated somatic tier 1-3 SNVs from capture/deep sequencing are shown for the MDS vs. sAML samples. A single dominant clone was present in MDS and persisted at the sAML stage. Only 2 SNVs were acquired or enriched between MDS and sAML. (c) Sequence coverage from WGS was uniform across chromosomes and between normal (skin) and sAML samples. (d) Circos plot summarizing somatic changes identified by WGS in index case. Outer ring: validated tier 1 SNVs; middle ring: heterozygosity of sAML sample (no loss of heterozygosity detected); inner ring: copy number of sAML sample (no copy number alterations detected). SNV, single nucleotide variant. UPN, unique patient number.

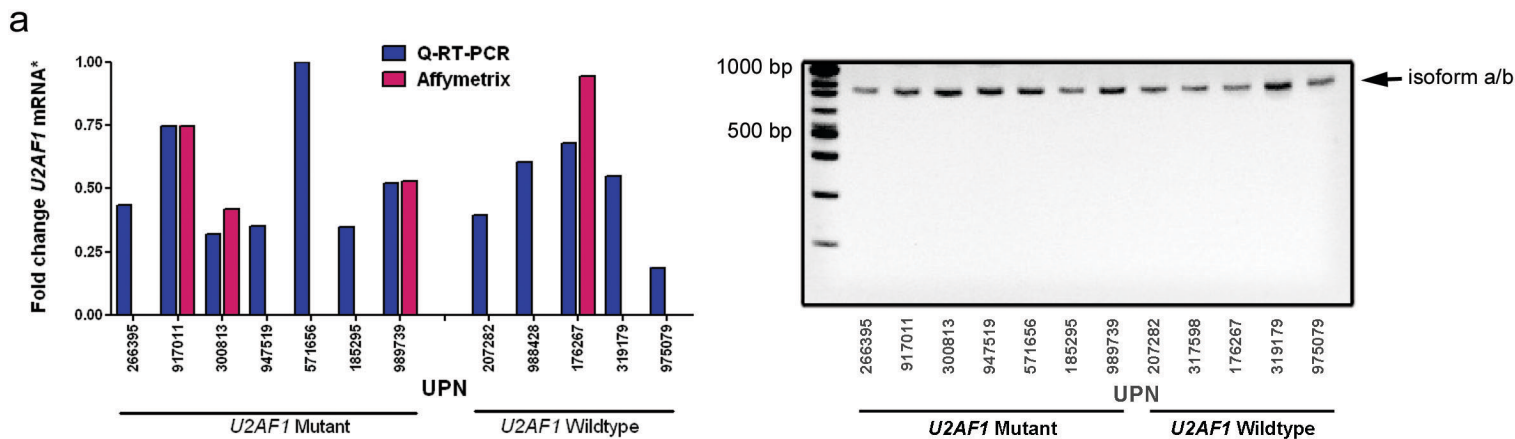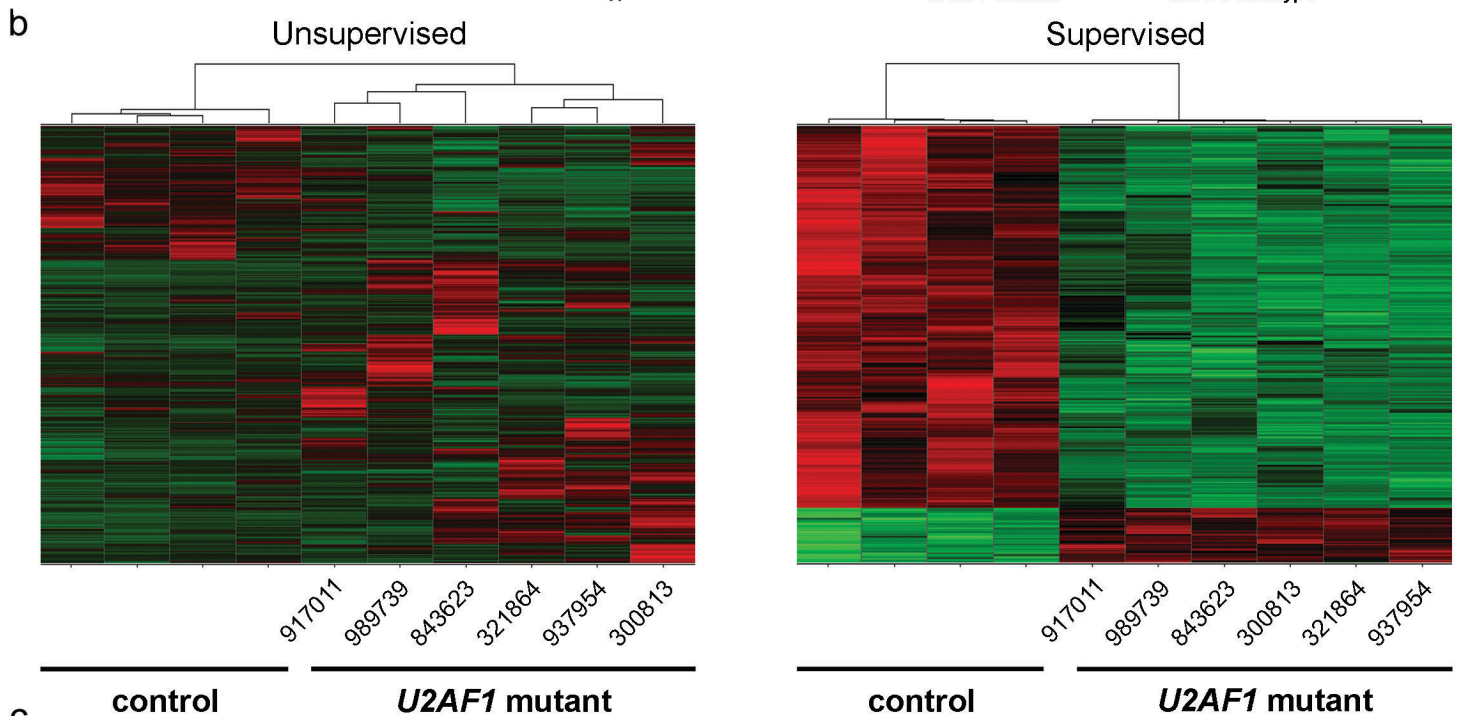

**c**

| Annotation Cluster 1 |                                                | Enrichment Score: 7.715 |               |                 |                   |
|----------------------|------------------------------------------------|-------------------------|---------------|-----------------|-------------------|
| Category             | Term                                           | # genes                 | % total genes | Fold Enrichment | Benjamini p-value |
| GOTERM_CC_FAT        | GO:0031974:membrane-enclosed lumen             | 67                      | 22.33         | 2.09            | 8.89E-07          |
| GOTERM_CC_FAT        | GO:0070013:intracellular organelle lumen       | 64                      | 21.33         | 2.08            | 1.41E-06          |
| GOTERM_CC_FAT        | GO:0043233:organelle lumen                     | 64                      | 21.33         | 2.03            | 2.29E-06          |
| GOTERM_CC_FAT        | GO:0031981:nuclear lumen                       | 52                      | 17.33         | 2.07            | 3.73E-05          |
| Annotation Cluster 2 |                                                | Enrichment Score: 4.311 |               |                 |                   |
| Category             | Term                                           | # genes                 | % total genes | Fold Enrichment | Benjamini p-value |
| SMART                | SM00360:RRM                                    | 14                      | 4.67          | 4.18            | 3.33E-03          |
| INTERPRO             | IPR000504:RNA recognition motif, RNP-1         | 14                      | 4.67          | 3.92            | 3.70E-02          |
| INTERPRO             | IPR012677:Nucleotide-binding, alpha-beta plait | 14                      | 4.67          | 3.88            | 2.05E-02          |

**Supplementary Figure 2. U2AF1 quantitative RT-PCR and global expression profiling.** (a, left panel) qRT-PCR of U2AF1 (exons 2-3 of isoform A) mRNA was performed using RNA extracted from unpurified bone marrow cells from patients with (n=7) and without (n=5) U2AF1 mutations. Affymetrix U133plus2 array data were available for 4 of the patients and are plotted for comparison. There was no significant difference in the expression of U2AF1 in mutant vs. wild-type MDS patient samples (p=0.73). (a, right panel) RT-PCR was performed using RNA extracted from unpurified bone marrow cells from patients with (n=7) and without (n=5) U2AF1 mutations. Primers were designed to detect all 3 isoforms of U2AF1. Full-length isoform a was detected in all samples, independent of mutation status. (b, left panel) Unsupervised hierarchical clustering results using Ward's method and 37,552 probesets from Affymetrix U133plus2 arrays (probesets were excluded only if absent in all samples being compared). RNA was obtained from CD34+ purified bone marrow cells from 4 normal healthy controls and 6 MDS samples with a U2AF1 mutation. (b, right panel) Supervised hierarchical clustering using Ward's method and 401 probesets identified by Significance Analysis of Microarrays (SAM), comparing control and U2AF1 mutant MDS samples with a false discovery rate (FDR) < 0.005. (c) Nine gene ontology annotation clusters were identified by DAVID using 351 probesets (300 gene symbols) that were down-regulated in U2AF1 mutant compared to control samples (identified by SAM) and had an enrichment score > 2 in DAVID. The top 2 clusters are shown. RNA recognition motif (RRM) gene categories were down-regulated in the U2AF1 samples compared to control samples. UPN, unique patient number. \* relative to GAPDH mRNA expression.



## No Transplant

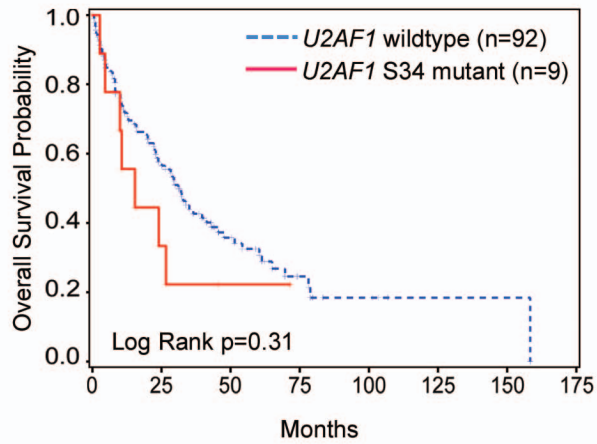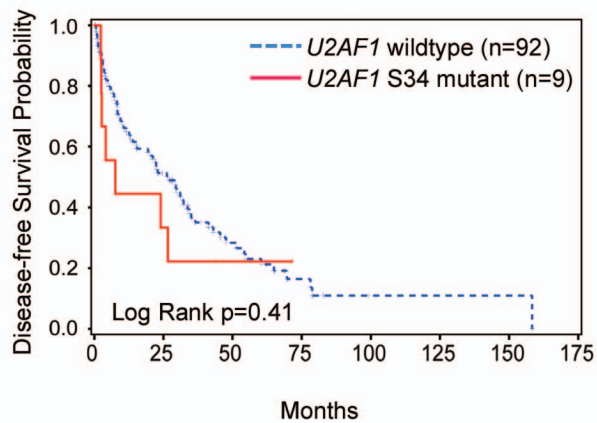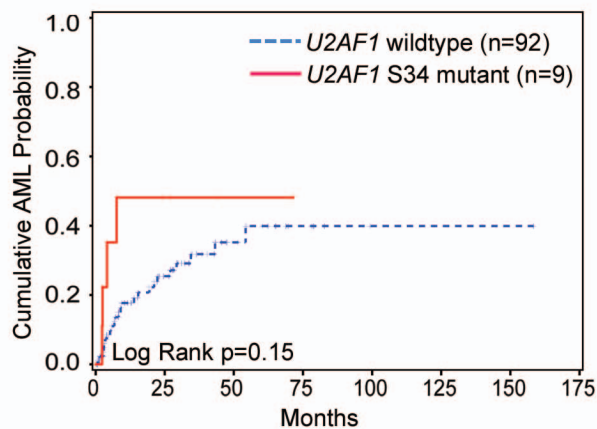

## Transplant

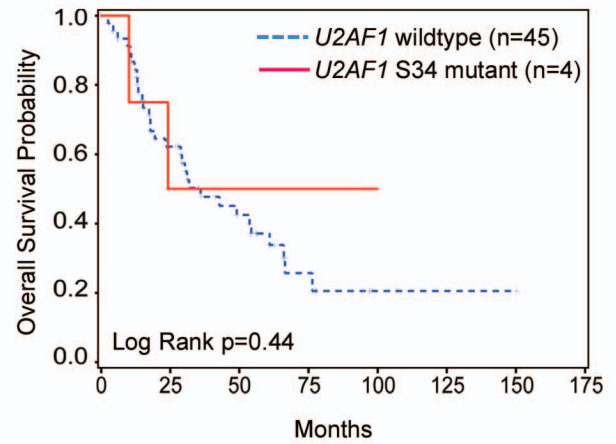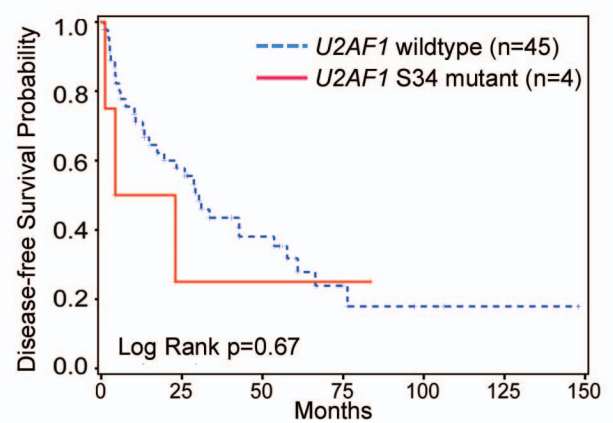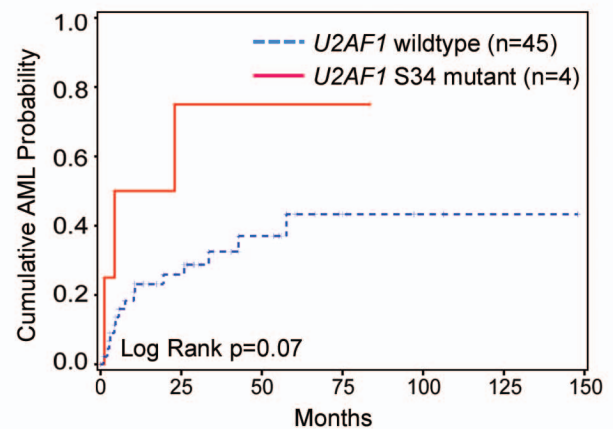

### Supplementary Figure 3. Survival analysis in transplanted vs. non-transplanted patients.

(left column) Overall, event-free survival, and probability of progression to sAML were not significantly different in U2AF1 wildtype vs. mutant MDS patients who *did not* undergo stem cell transplantation.

(right column) Overall, event-free survival, and probability of progression to sAML were not significantly different in U2AF1 wildtype vs. mutant MDS patients who *did* undergo stem cell transplantation.

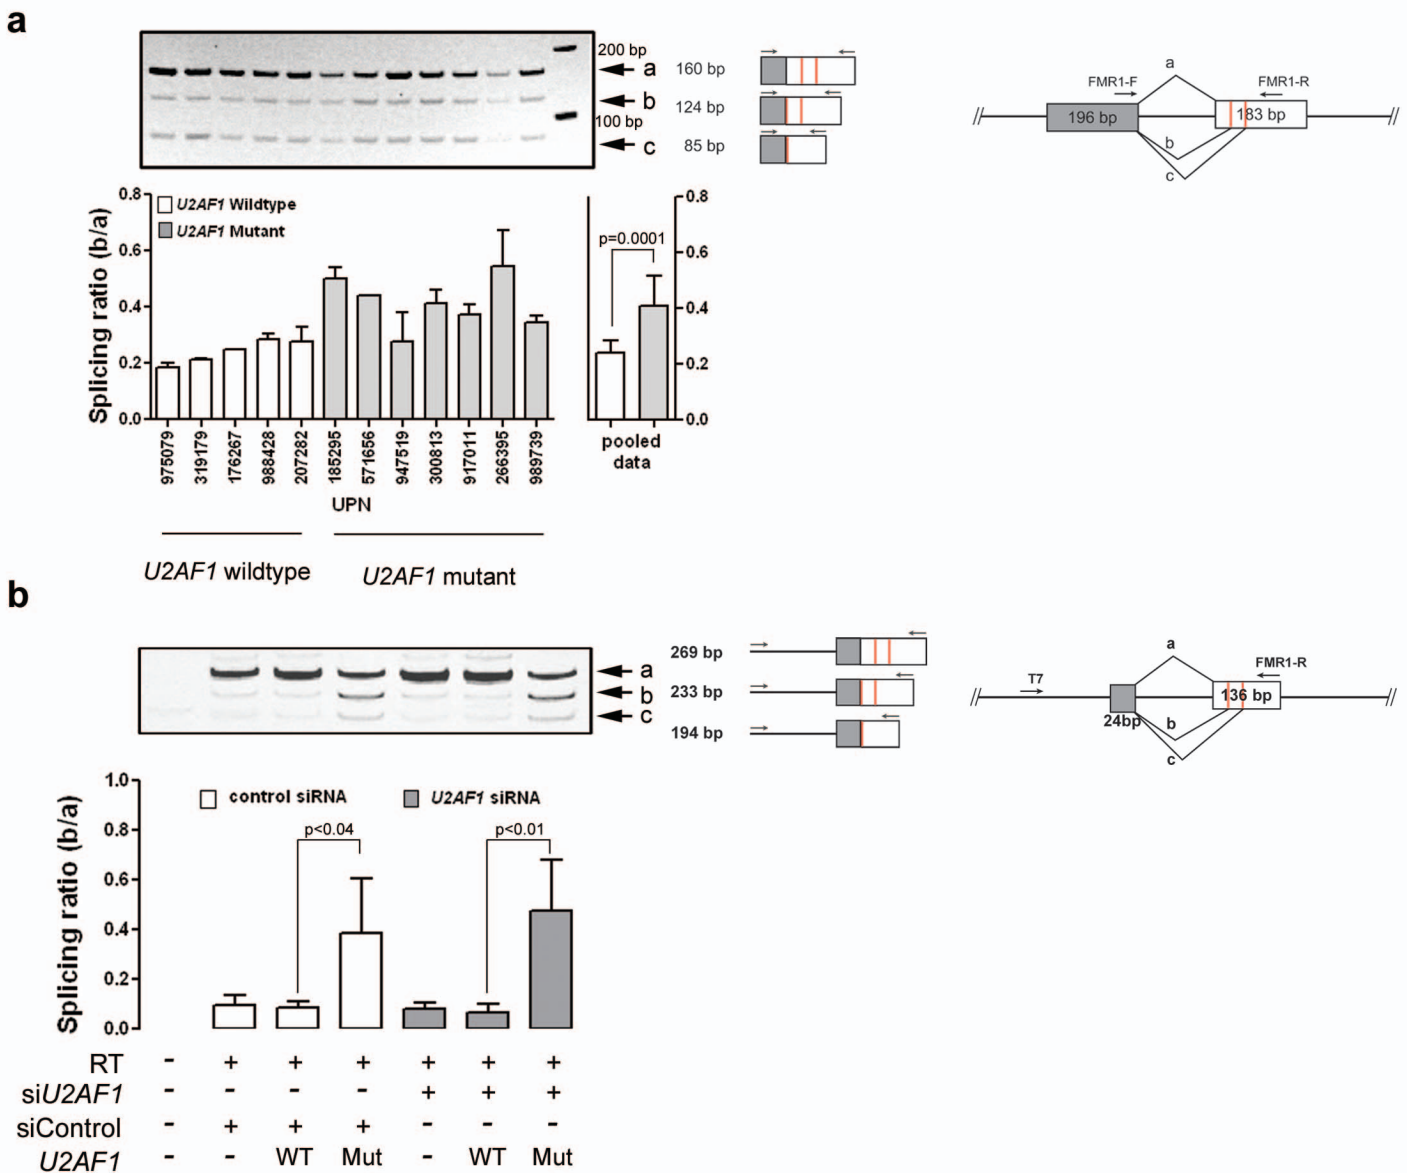

**Supplementary Figure 4. U2AF1 S34F mutation induces splicing alterations in FMR1.** (a) The relative ratios of alternatively spliced products was measured following RT-PCR of RNA extracted from unpurified bone marrow cells from patients with (n=7) and without (n=5) U2AF1 mutations. A cartoon of FMR1 exons 14 and 15 that are interrogated by the assay and the possible splice products are indicated (labeled a, b, or c). A representative PCR gel image is shown and the ratio of the middle band (amplicon b, utilizing the 3' cryptic splice acceptor site) relative to the fully spliced upper band (amplicon a) is shown for each condition. The ratio of splice products was measured by densitometry and plotted in the bar graph with the p-value listed. Patient samples with U2AF1 mutations had increased usage of a cryptic 3' splice acceptor site in exon 15 of FMR1 relative to nonmutant patient samples (left panel, error bars represent two independent experiments) (wildtype vs. mutant splicing ratio,  $p < 0.03$  for both independent experiments in the left panel,  $p = 0.0001$  for pooled data in the right panel). (b) The FMR1 minigene (generated using primers shown in panel a) was transiently transfected into 293T cells with a control plasmid (pcDNA3.1-YFP), wild-type U2AF1 cDNA, or mutant (S34F) U2AF1 cDNA in the presence of a control siRNA or siRNA targeting endogenous U2AF1. RNA was harvested 48 hours later and a reverse transcriptase reaction was performed to create cDNA. PCR using the indicated primers resulted in a fully spliced 269 base pair amplicon or smaller amplicons (233 or 194 basepairs) that skip the first splice acceptor site. A representative PCR gel image is shown and the ratio of the middle band (cryptic 3' splice acceptor site = amplicon b) relative to the fully spliced upper band (amplicon a) is shown for each condition. Expression of S34F mutant U2AF1 resulted in an increase in cryptic 3' splice acceptor usage compared to control or wild-type U2AF1, independent of endogenous U2AF1 levels (n=4,  $P < 0.04$ ).

**Supplementary Table 1. Sequence metrics.**

| Parameter                                | Normal Genome | MDS Tumor Genome | sAML Tumor Genome |
|------------------------------------------|---------------|------------------|-------------------|
| <b>Whole Genome Sequence</b>             |               |                  |                   |
| lanes                                    | 8             | ND               | 12                |
| sequence production (Gbp)                | 134.91        | ND               | 132.24            |
| aligned (Gbp)                            | 122.80        | ND               | 124.37            |
| deduplicated (Gbp)                       | 114.50        | ND               | 116.32            |
| haploid coverage                         | 38.23         | ND               | 39.12             |
| bases with $\geq 1x$ coverage (%)        | 92.97         | ND               | 93.00             |
| bases with $>10x$ coverage (%)           | 91.87         | ND               | 92.49             |
| bases with $>20x$ coverage (%)           | 86.23         | ND               | 89.12             |
| CCDS bases with $\geq 1x$ coverage (%)   | 99.42         | ND               | 99.67             |
| CCDS bases with $\geq 10x$ coverage (%)  | 92.24         | ND               | 97.21             |
| CCDS bases with $\geq 20x$ coverage (%)  | 73.61         | ND               | 88.52             |
| Het SNPs (Affy)                          | 226,603       | ND               | 224,808           |
| Hom SNPs (Affy)                          | 166,483       | ND               | 167,609           |
| Diploid coverage Het SNPs (%)            | 98.91         | ND               | 99.31             |
| Diploid coverage Hom SNPs (%)            | 99.55         | ND               | 99.17             |
| <b>Capture Validation</b>                |               |                  |                   |
| target bases with $\geq 1x$ coverage (%) | 93.06         | 93.78            | 94.86             |
| target bases with $>10x$ coverage (%)    | 87.16         | 88.53            | 91.34             |
| target bases with $>20x$ coverage (%)    | 84.22         | 86.15            | 89.84             |

CCDS, consensus coding DNA sequence; ND, not done.

Het SNPs, single nucleotide polymorphic sites genotyped as heterozygous using Affymetric 6.0 SNP array and both wildtype and variant alleles detected in whole genome sequence data

Hom SNPs, single nucleotide polymorphic sites genotyped as homozygous using Affymetric 6.0 SNP array and only variant allele detected in whole genome sequence data

Supplementary Table 2. Validated Tier 1-3 SNVs in the MDS and sAML genomes.

| Chr | Start       | Ref Allele | Var Allele | Gene Name       | Tier | Mutation                    | Ref Reads in Normal | Var Reads in Normal | Var Freq in Normal | Ref Reads in MDS | Var Reads in MDS | Var Freq in MDS | Copy number adjusted Var Freq in MDS | Var Type MDS | Somatic P-value | Ref Reads in AML | Var Reads in AML | Var Freq in AML | Copy number adjusted Var Freq in AML | Var Type AML | Somatic P-value | Mutation Cluster |   |
|-----|-------------|------------|------------|-----------------|------|-----------------------------|---------------------|---------------------|--------------------|------------------|------------------|-----------------|--------------------------------------|--------------|-----------------|------------------|------------------|-----------------|--------------------------------------|--------------|-----------------|------------------|---|
| 1   | 19,065,087  | G          | A          | TAS1R2          | 3    | 5_prime_flanking_region     | 559                 | 16                  | 2.78               | 82               | 79               | 49.07           | 49.07                                | Somatic      | 0.000           | 241              | 236              | 49.48           | 49.48                                | Somatic      | 0.000           | 1                |   |
| 1   | 19,575,544  | G          | A          | CAPZB           | 3    | intrinsic                   | 240                 | 14                  | 5.51               | 90               | 70               | 43.75           | 43.75                                | Somatic      | 0.000           | 220              | 186              | 45.81           | 45.81                                | Somatic      | 0.000           | 1                |   |
| 1   | 35,025,125  | A          | G          | GJA4            | 2    | 5_prime_flanking_region     | 891                 | 11                  | 1.22               | 383              | 318              | 45.36           | 45.36                                | Somatic      | 0.000           | 437              | 345              | 44.12           | 44.12                                | Somatic      | 0.000           | 1                |   |
| 1   | 43,382,798  | G          | A          | FAM183A         | 3    | 5_prime_untranslated_region | 1361                | 56                  | 3.95               | 559              | 480              | 46.20           | 46.20                                | Somatic      | 0.000           | 406              | 341              | 45.65           | 45.65                                | Somatic      | 0.000           | 1                |   |
| 1   | 53,979,456  | C          | T          | GLIS1           | 3    | 5_prime_flanking_region     | 219                 | 28                  | 11.34              | 231              | 203              | 46.77           | 46.77                                | Somatic      | 0.000           | 201              | 180              | 47.24           | 47.24                                | Somatic      | 0.000           | 1                |   |
| 1   | 54,441,310  | C          | T          | MRPL37          | 2    | intrinsic                   | 691                 | 34                  | 4.69               | 274              | 259              | 48.59           | 48.59                                | Somatic      | 0.000           | 286              | 254              | 47.04           | 47.04                                | Somatic      | 0.000           | 1                |   |
| 1   | 60,329,124  | A          | G          | C1orf87         | 2    | 5_prime_flanking_region     | 664                 | 25                  | 3.63               | 679              | 571              | 45.68           | 45.68                                | Somatic      | 0.000           | 394              | 355              | 47.40           | 47.40                                | Somatic      | 0.000           | 1                |   |
| 1   | 61,483,596  | C          | T          | NFIA            | 3    | intrinsic                   | 134                 | 10                  | 6.94               | 127              | 120              | 48.58           | 48.58                                | Somatic      | 0.000           | 203              | 171              | 45.72           | 45.72                                | Somatic      | 0.000           | 1                |   |
| 1   | 63,400,074  | G          | T          | ENSG00000210785 | 2    | 3_prime_flanking_region     | 792                 | 27                  | 3.30               | 942              | 938              | 49.89           | 49.89                                | Somatic      | 0.000           | 470              | 422              | 47.31           | 47.31                                | Somatic      | 0.000           | 1                |   |
| 1   | 66,393,703  | C          | T          | PDE4B           | 3    | intrinsic                   | 638                 | 27                  | 4.06               | 591              | 451              | 43.28           | 43.28                                | Somatic      | 0.000           | 306              | 273              | 47.15           | 47.15                                | Somatic      | 0.000           | 1                |   |
| 1   | 84,880,057  | A          | C          | C1orf180        | 3    | 5_prime_flanking_region     | 366                 | 15                  | 3.94               | 930              | 61               | 6.16            | 6.16                                 | Somatic      | 0.201           | 599              | 183              | 23.40           | 23.40                                | Somatic      | 0.000           | 0                |   |
| 1   | 91,923,288  | C          | T          | TGFR3           | 3    | intrinsic                   | 603                 | 27                  | 4.29               | 488              | 507              | 50.95           | 50.95                                | Somatic      | 0.000           | 329              | 321              | 49.38           | 49.38                                | Somatic      | 0.000           | 1                |   |
| 1   | 97,037,795  | T          | C          | PTBP2           | 3    | intrinsic                   | 269                 | 8                   | 2.89               | 568              | 529              | 48.22           | 48.22                                | Somatic      | 0.000           | 296              | 259              | 46.67           | 46.67                                | Somatic      | 0.000           | 1                |   |
| 1   | 106,376,327 | C          | G          | LOC126987       | 3    | 3_prime_flanking_region     | 242                 | 9                   | 3.59               | 279              | 280              | 50.09           | 50.09                                | Somatic      | 0.000           | 325              | 293              | 47.41           | 47.41                                | Somatic      | 0.000           | 1                |   |
| 1   | 111,623,853 | C          | T          | CHIA            | 2    | 5_prime_flanking_region     | 1328                | 27                  | 1.99               | 897              | 735              | 45.04           | 45.04                                | Somatic      | 0.000           | 567              | 416              | 42.32           | 42.32                                | Somatic      | 0.000           | 1                |   |
| 1   | 112,325,945 | G          | T          | KCND3           | 3    | silent                      | 708                 | 17                  | 2.34               | 278              | 245              | 46.85           | 46.85                                | Somatic      | 0.000           | 298              | 268              | 47.35           | 47.35                                | Somatic      | 0.000           | 1                |   |
| 1   | 146,213,819 | A          | T          | LOC10132219     | 3    | 5_prime_flanking_region     | 801                 | 40                  | 4.76               | 206              | 173              | 45.65           | 45.65                                | Somatic      | 0.000           | 332              | 286              | 46.28           | 46.28                                | Somatic      | 0.000           | 1                |   |
| 1   | 157,603,769 | G          | T          | OR10J1          | 3    | intrinsic                   | 616                 | 31                  | 4.79               | 462              | 372              | 44.60           | 44.60                                | Somatic      | 0.000           | 278              | 243              | 46.64           | 46.64                                | Somatic      | 0.000           | 1                |   |
| 1   | 163,243,072 | C          | T          | ENSG00000210270 | 3    | 5_prime_flanking_region     | 595                 | 18                  | 2.94               | 654              | 556              | 45.95           | 45.95                                | Somatic      | 0.000           | 310              | 249              | 44.54           | 44.54                                | Somatic      | 0.000           | 1                |   |
| 1   | 165,197,653 | G          | A          | ILDR2           | 3    | intrinsic                   | 1699                | 61                  | 3.47               | 475              | 437              | 47.92           | 47.92                                | Somatic      | 0.000           | 469              | 423              | 47.42           | 47.42                                | Somatic      | 0.000           | 1                |   |
| 1   | 165,827,772 | C          | T          | CREG1           | 3    | 5_prime_flanking_region     | 238                 | 13                  | 5.18               | 218              | 165              | 43.08           | 43.08                                | Somatic      | 0.000           | 311              | 254              | 44.96           | 44.96                                | Somatic      | 0.000           | 1                |   |
| 1   | 174,944,913 | C          | T          | PAPPA2          | 3    | intrinsic                   | 946                 | 1                   | 0.11               | 1713             | 47               | 2.67            | 2.67                                 | Somatic      | 0.000           | 514              | 136              | 20.92           | 20.92                                | Somatic      | 0.000           | 2                |   |
| 1   | 175,516,166 | C          | A          | FAM5B           | 3    | splice_region               | 679                 | 27                  | 3.82               | 680              | 565              | 45.38           | 45.38                                | Somatic      | 0.000           | 329              | 311              | 48.59           | 48.59                                | Somatic      | 0.000           | 1                |   |
| 1   | 205,309,412 | C          | G          | PFKFB2          | 1    | silent                      | 593                 | 21                  | 3.42               | 447              | 414              | 48.08           | 48.08                                | Somatic      | 0.000           | 331              | 332              | 50.08           | 50.08                                | Somatic      | 0.000           | 1                |   |
| 1   | 206,921,075 | G          | A          | ENSG00000217293 | 3    | 3_prime_flanking_region     | 396                 | 11                  | 2.70               | 275              | 256              | 48.21           | 48.21                                | Somatic      | 0.000           | 389              | 293              | 42.96           | 42.96                                | Somatic      | 0.000           | 1                |   |
| 1   | 215,059,819 | C          | T          | ESRRG           | 3    | intrinsic                   | 321                 | 8                   | 2.43               | 306              | 271              | 46.97           | 46.97                                | Somatic      | 0.000           | 417              | 311              | 42.72           | 42.72                                | Somatic      | 0.000           | 1                |   |
| 1   | 215,500,402 | A          | T          | ENSG00000210753 | 2    | 3_prime_flanking_region     | 830                 | 23                  | 2.70               | 933              | 745              | 44.40           | 44.40                                | Somatic      | 0.000           | 428              | 371              | 46.43           | 46.43                                | Somatic      | 0.000           | 1                |   |
| 1   | 225,042,030 | C          | T          | ITPKB           | 3    | 5_prime_flanking_region     | 422                 | 19                  | 4.31               | 197              | 181              | 47.88           | 47.88                                | Somatic      | 0.000           | 215              | 193              | 47.30           | 47.30                                | Somatic      | 0.000           | 1                |   |
| 1   | 229,096,537 | T          | C          | ENSG00000222671 | 1    | rna                         | 406                 | 20                  | 4.69               | 172              | 146              | 45.91           | 45.91                                | Somatic      | 0.000           | 231              | 219              | 48.67           | 48.67                                | Somatic      | 0.000           | 1                |   |
| 1   | 232,624,711 | A          | C          | TARBP1          | 3    | intrinsic                   | 444                 | 21                  | 4.52               | 964              | 122              | 11.23           | 11.23                                | Somatic      | 0.048           | 287              | 257              | 47.24           | 47.24                                | Somatic      | 0.000           | 1                |   |
| 1   | 242,682,289 | T          | G          | ADSS            | 2    | 5_prime_flanking_region     | 110                 | 0                   | 0.00               | 372              | 7                | 1.85            | 1.85                                 | Somatic      | 0.165           | 460              | 133              | 22.43           | 22.43                                | Somatic      | 0.000           | 2                |   |
| 1   | 244,630,678 | C          | T          | SMYD3           | 2    | intrinsic                   | 292                 | 10                  | 3.31               | 299              | 198              | 39.84           | 39.84                                | Somatic      | 0.000           | 302              | 303              | 50.08           | 50.08                                | Somatic      | 0.000           | 1                |   |
| 1   | 246,007,658 | G          | A          | OR1C1           | 3    | 5_prime_flanking_region     | 434                 | 8                   | 1.81               | 579              | 510              | 46.83           | 46.83                                | Somatic      | 0.000           | 369              | 286              | 43.66           | 43.66                                | Somatic      | 0.000           | 1                |   |
| 2   | 863,187     | C          | T          | LOC391343       | 3    | 3_prime_flanking_region     | 379                 | 21                  | 5.25               | 106              | 46               | 30.26           | 30.26                                | Somatic      | 0.000           | 310              | 252              | 44.84           | 44.84                                | Somatic      | 0.000           | 0                |   |
| 2   | 12,407,391  | G          | A          |                 | 0    | 3                           | 0                   | 1171                | 40                 | 3.30             | 634              | 556             | 46.72                                | 46.72        | Somatic         | 0.000            | 403              | 394             | 49.44                                | 49.44        | Somatic         | 0.000            | 1 |
| 2   | 20,289,990  | C          | T          | LOC100131373    | 1    | silent                      | 20                  | 0                   | 0.00               | 8                | 16               | 66.67           | 66.67                                | Somatic      | 0.000           | 92               | 92               | 50.00           | 50.00                                | Somatic      | 0.000           | 0                |   |
| 2   | 35,703,943  | G          | A          |                 | 0    | 3                           | 0                   | 682                 | 24                 | 3.40             | 511              | 518             | 50.34                                | 50.34        | Somatic         | 0.000            | 344              | 293             | 46.00                                | 46.00        | Somatic         | 0.000            | 1 |
| 2   | 35,720,616  | T          | C          |                 | 0    | 3                           | 0                   | 501                 | 24                 | 4.57             | 608              | 526             | 46.38                                | 46.38        | Somatic         | 0.000            | 427              | 368             | 46.29                                | 46.29        | Somatic         | 0.000            | 1 |
| 2   | 39,902,719  | T          | C          | THUMP2D         | 3    | 5_prime_flanking_region     | 340                 | 7                   | 2.02               | 538              | 477              | 47.00           | 47.00                                | Somatic      | 0.000           | 189              | 169              | 47.21           | 47.21                                | Somatic      | 0.000           | 1                |   |
| 2   | 61,569,230  | T          | A          | XPO1            | 1    | missense                    | 386                 | 17                  | 4.22               | 206              | 145              | 41.31           | 41.31                                | Somatic      | 0.000           | 373              | 322              | 46.33           | 46.33                                | Somatic      | 0.000           | 1                |   |
| 2   | 69,027,275  | A          | G          | GKN2            | 3    | intrinsic                   | 519                 | 3                   | 0.57               | 1093             | 51               | 4.46            | 4.46                                 | Somatic      | 0.000           | 545              | 156              | 22.25           | 22.25                                | Somatic      | 0.000           | 2                |   |
| 2   | 77,345,681  | G          | T          | LRRTM4          | 3    | intrinsic                   | 540                 | 25                  | 4.42               | 1135             | 1029             | 47.55           | 47.55                                | Somatic      | 0.000           | 399              | 352              | 46.87           | 46.87                                | Somatic      | 0.000           | 1                |   |
| 2   | 80,591,943  | A          | G          | CTNNA2          | 3    | intrinsic                   | 548                 | 18                  | 3.18               | 547              | 453              | 45.30           | 45.30                                | Somatic      | 0.000           | 392              | 309              | 44.08           | 44.08                                | Somatic      | 0.000           | 1                |   |
| 2   | 89,010,893  | C          | T          | ENSG00000219044 | 3    | 5_prime_flanking_region     | 198                 | 4                   | 1.98               | 226              | 200              | 46.95           | 46.95                                | Somatic      | 0.000           | 274              | 228              | 45.42           | 45.42                                | Somatic      | 0.000           | 1                |   |
| 2   | 98,221,020  | T          | A          | VWA3B           | 3    | intrinsic                   | 736                 | 52                  | 6.60               | 442              | 407              | 47.94           | 47.94                                | Somatic      | 0.000           | 283              | 263              | 48.17           | 48.17                                | Somatic      | 0.000           | 1                |   |
| 2   | 123,201,256 | G          | A          |                 | 0    | 3                           | 0                   | 126                 | 2                  | 1.56             | 158              | 116             | 42.34                                | 42.34        | Somatic         | 0.000            | 194              | 167             | 46.26                                | 46.26        | Somatic         | 0.000            | 1 |
| 2   | 125,241,196 | C          | T          | CNTNAP5         | 2    | intrinsic                   | 683                 | 75                  | 9.89               | 925              | 708              | 43.36           | 43.36                                | Somatic      | 0.000           | 303              | 289              | 48.82           | 48.82                                | Somatic      | 0.000           | 1                |   |
| 2   | 126,115,254 | G          | T          |                 | 0    | 3                           | 0                   | 537                 | 11                 | 2.01             | 690              | 544             | 44.08                                | 44.08        | Somatic         | 0.000            | 265              | 232             | 46.68                                | 46.68        | Somatic         | 0.000            | 1 |
| 2   | 129,312,063 | T          | C          |                 | 0    | 3                           | 0                   | 222                 | 3                  | 1.33             | 165              | 124             | 42.91                                | 42.91        | Somatic         | 0.000            | 227              | 119             | 34.39                                | 34.39        | Somatic         | 0.000            | 0 |
| 2   | 132,910,452 | A          | C          | GPR39           | 3    | intrinsic                   | 335                 | 1                   | 0.30               | 398              | 383              | 49.04           | 49.04                                | Somatic      | 0.000           | 361              | 266              | 42.42           | 42.42                                | Somatic      | 0.000           | 1                |   |
| 2   | 138,312,675 | C          | T          |                 | 0    | 3                           | 0                   | 917                 | 14                 | 1.50             | 557              | 438             | 44.02                                | 44.02        | Somatic         | 0.000            | 444              | 360             | 44.78                                | 44.78        | Somatic         | 0.000            | 1 |
| 2   | 148,169,122 | C          | G          |                 | 0    | 3                           | 0                   | 776                 | 39                 | 4.79             | 384              | 367             | 48.87                                | 48.87        | Somatic         | 0.000            | 371              | 365             | 49.59                                | 49.59        | Somatic         | 0.000            | 1 |
| 2   | 148,826,888 | C          | G          | MBD5            | 3    | intrinsic                   | 403                 | 31                  | 7.14               | 332              | 320              | 49.08           | 49.08                                | Somatic      | 0.000           | 233              | 239              | 50.64           | 50.64                                | Somatic      | 0.000           | 1                |   |
| 2   | 151,024,156 | A          | T          | RND3            | 3    | 3_prime_flanking_region     | 517                 | 10                  | 1.90               | 500              | 442              | 46.92           | 46.92                                | Somatic      | 0.000           | 252              | 254              | 50.20           | 50.20                                | Somatic      | 0.000           | 1                |   |
| 2   | 163,476,519 | G          | T          |                 | 0    | 3                           | 0                   | 609                 | 14                 | 2.25             | 474              | 360             | 43.17                                | 43.17        | Somatic         | 0.000            | 412              | 403             | 49.45                                | 49.45        | Somatic         | 0.000            | 1 |
| 2   | 164,335,975 | T          | C          | FIGN            | 3    | 5_prime_flanking_region     | 598                 | 22                  | 3.55               | 555              | 470              | 45.85           | 45.85                                | Somatic      | 0.000           | 395              | 325              | 45.14           | 45.14                                | Somatic      | 0.000           | 1                |   |
| 2   | 165,485,434 | G          | A          | SLC38A11        | 3    | intrinsic                   | 876                 | 27                  | 2.99               | 965              | 915              | 48.67           | 48.67                                | Somatic      | 0.000           | 369              | 361              | 49.45           | 49.45                                | Somatic      | 0.000           | 1                |   |
| 2   | 173,997,180 | T          | A          | LOC100130171    | 3    | 3_prime_flanking_region     | 28                  | 0                   | 0.00               | 20               | 29               | 59.18           | 59.18                                | Somatic      | 0.000           | 78               | 73               | 48.34           | 48.34                                | Somatic      | 0.000           | 0                |   |
| 2   | 176,980,601 | G          | A          | ENSG00000221304 | 2    | 5_prime_flanking_region     | 537                 | 23                  | 4.11               | 416              | 316              | 43.17           | 43.17                                | Somatic      | 0.000           | 251              | 219              | 46.60           | 46.60                                | Somatic      | 0.000           | 1                |   |
| 2   | 177,423,844 | A          | C          | LOC100131991    | 3    | 5_prime_flanking_region     | 663                 | 6                   | 0.90               | 1615             | 18               | 1.10            | 1.10                                 | Somatic      | 0.048           | 748              | 150              | 16.70           | 16.70                                | Somatic      | 0.000           | 1                |   |
| 2   | 184,200,811 | G          | A          | LOC644877       | 3    | 5_prime_flanking_region     | 393                 | 10                  | 2.48               | 542              | 476              | 46.76           | 46.76                                | Somatic      | 0.000           | 309              | 247              | 44.42           | 44.42                                | Somatic      | 0.000           | 1                |   |
| 2   | 193,919,617 | T          | C          |                 | 0    | 3                           | 0                   | 92                  | 5                  | 5.15             | 235              | 129             | 35.44                                | 35.44        | Somatic         | 0.000            | 228              | 177             | 43.70                                | 43.70        | Somatic         | 0.000            | 0 |
|     |             |            |            |                 |      |                             |                     |                     |                    |                  |                  |                 |                                      |              |                 |                  |                  |                 |                                      |              |                 |                  |   |



|   |             |   |   |                 |   |                             |      |     |       |       |     |       |       |         |         |       |     |       |       |         |         |       |   |
|---|-------------|---|---|-----------------|---|-----------------------------|------|-----|-------|-------|-----|-------|-------|---------|---------|-------|-----|-------|-------|---------|---------|-------|---|
| 3 | 13,411,614  | G | A | NUP210          | 3 | intronic                    | 193  | 6   | 3.02  | 65    | 61  | 48.41 | 48.41 | Somatic | 0.000   | 161   | 136 | 45.79 | 45.79 | Somatic | 0.000   | 1     |   |
| 3 | 21,855,819  | A | C | ENSG00000221384 | 3 | 3_prime_flanking_region     | 0    | 405 | 53    | 11.57 | 791 | 197   | 19.94 | 19.94   | Somatic | 0.000 | 303 | 223   | 42.40 | 42.40   | Somatic | 0.000 | 0 |
| 3 | 26,376,984  | G | A |                 | 0 | 3                           | 269  | 9   | 3.24  | 302   | 283 | 48.38 | 48.38 | Somatic | 0.000   | 163   | 132 | 44.75 | 44.75 | Somatic | 0.000   | 1     |   |
| 3 | 26,998,497  | G | A |                 | 0 | 3                           | 692  | 37  | 5.08  | 983   | 698 | 41.52 | 41.52 | Somatic | 0.000   | 411   | 347 | 45.78 | 45.78 | Somatic | 0.000   | 1     |   |
| 3 | 40,732,099  | G | T | LOC729505       | 2 | 5_prime_flanking_region     | 683  | 26  | 3.67  | 626   | 616 | 49.60 | 49.60 | Somatic | 0.000   | 458   | 376 | 45.08 | 45.08 | Somatic | 0.000   | 1     |   |
| 3 | 45,981,158  | T | G | FYCO1           | 3 | intronic                    | 345  | 17  | 4.70  | 326   | 31  | 8.68  | 8.68  | Somatic | 0.324   | 377   | 136 | 26.51 | 26.51 | Somatic | 0.000   | 0     |   |
| 3 | 47,603,402  | G | T | SMARCC1         | 3 | 3_prime_untranslated_region | 564  | 70  | 11.04 | 275   | 42  | 13.25 | 13.25 | Somatic | 0.533   | 404   | 176 | 30.34 | 30.34 | Somatic | 0.000   | 0     |   |
| 3 | 53,603,765  | T | G | CACNA1D         | 3 | intronic                    | 821  | 89  | 9.78  | 1229  | 297 | 19.46 | 19.46 | Somatic | 0.000   | 411   | 204 | 33.17 | 33.17 | Somatic | 0.000   | 0     |   |
| 3 | 75,444,179  | C | T | ENSG00000179799 | 3 | 3_prime_flanking_region     | 1238 | 2   | 0.16  | 1384  | 31  | 2.19  | 2.19  | Somatic | 0.000   | 598   | 163 | 21.42 | 21.42 | Somatic | 0.000   | 2     |   |
| 3 | 75,472,731  | A | C | LOC728135       | 3 | 3_prime_flanking_region     | 322  | 12  | 3.59  | 226   | 186 | 45.15 | 45.15 | Somatic | 0.000   | 187   | 164 | 46.72 | 46.72 | Somatic | 0.000   | 1     |   |
| 3 | 76,099,526  | G | A | ROBO2           | 3 | intronic                    | 277  | 5   | 1.77  | 476   | 225 | 32.10 | 32.10 | Somatic | 0.000   | 230   | 198 | 46.26 | 46.26 | Somatic | 0.000   | 0     |   |
| 3 | 76,586,575  | C | T | ROBO2           | 3 | intronic                    | 233  | 2   | 0.85  | 354   | 144 | 28.92 | 28.92 | Somatic | 0.000   | 293   | 195 | 39.96 | 39.96 | Somatic | 0.000   | 0     |   |
| 3 | 80,602,658  | G | A |                 | 0 | 3                           | 126  | 3   | 2.33  | 171   | 147 | 46.23 | 46.23 | Somatic | 0.000   | 243   | 234 | 49.06 | 49.06 | Somatic | 0.000   | 1     |   |
| 3 | 81,055,536  | G | A |                 | 0 | 3                           | 490  | 35  | 6.67  | 686   | 616 | 47.31 | 47.31 | Somatic | 0.000   | 429   | 366 | 46.04 | 46.04 | Somatic | 0.000   | 1     |   |
| 3 | 85,219,286  | T | G | CADM2           | 3 | intronic                    | 159  | 15  | 8.62  | 261   | 169 | 39.30 | 39.30 | Somatic | 0.000   | 286   | 236 | 45.21 | 45.21 | Somatic | 0.000   | 1     |   |
| 3 | 86,451,526  | T | C | ENSG00000222934 | 3 | 5_prime_flanking_region     | 25   | 3   | 10.71 | 39    | 55  | 58.51 | 58.51 | Somatic | 0.000   | 51    | 49  | 49.00 | 49.00 | Somatic | 0.000   | 0     |   |
| 3 | 99,901,474  | T | G | ST3GAL6         | 2 | 5_prime_flanking_region     | 36   | 5   | 12.20 | 81    | 19  | 19.00 | 19.00 | Somatic | 0.285   | 55    | 85  | 60.71 | 60.71 | Somatic | 0.001   | 0     |   |
| 3 | 100,667,116 | C | T |                 | 0 | 3                           | 819  | 2   | 0.24  | 2861  | 55  | 1.89  | 1.89  | Somatic | 0.000   | 614   | 181 | 22.77 | 22.77 | Somatic | 0.000   | 2     |   |
| 3 | 111,192,335 | T | C |                 | 0 | 3                           | 338  | 7   | 2.03  | 438   | 411 | 48.41 | 48.41 | Somatic | 0.000   | 302   | 247 | 44.99 | 44.99 | Somatic | 0.000   | 1     |   |
| 3 | 111,431,333 | C | T |                 | 0 | 3                           | 153  | 1   | 0.65  | 287   | 213 | 42.60 | 42.60 | Somatic | 0.000   | 258   | 181 | 41.23 | 41.23 | Somatic | 0.000   | 1     |   |
| 3 | 115,134,962 | G | T | GRAMD1C         | 3 | intronic                    | 141  | 2   | 1.40  | 252   | 200 | 44.25 | 44.25 | Somatic | 0.000   | 236   | 188 | 44.34 | 44.34 | Somatic | 0.000   | 1     |   |
| 3 | 115,150,252 | C | G | ZDHHC23         | 2 | intronic                    | 296  | 7   | 2.31  | 480   | 393 | 45.02 | 45.02 | Somatic | 0.000   | 271   | 236 | 46.55 | 46.55 | Somatic | 0.000   | 1     |   |
| 3 | 133,430,465 | T | G | LOC729677       | 3 | 3_prime_flanking_region     | 1116 | 22  | 1.93  | 1852  | 136 | 6.84  | 6.84  | Somatic | 0.000   | 614   | 448 | 19.42 | 19.42 | Somatic | 0.000   | 0     |   |
| 3 | 133,441,990 | C | A | LOC729677       | 3 | 3_prime_flanking_region     | 542  | 37  | 6.39  | 721   | 670 | 48.17 | 48.17 | Somatic | 0.000   | 450   | 412 | 47.80 | 47.80 | Somatic | 0.000   | 1     |   |
| 3 | 134,386,054 | A | T | TMEM108         | 3 | intronic                    | 134  | 8   | 5.63  | 147   | 128 | 46.55 | 46.55 | Somatic | 0.000   | 233   | 185 | 44.26 | 44.26 | Somatic | 0.000   | 1     |   |
| 3 | 136,219,503 | A | G | EPHB1           | 3 | intronic                    | 1277 | 59  | 4.42  | 1050  | 100 | 8.70  | 8.70  | Somatic | 0.004   | 342   | 100 | 22.62 | 22.62 | Somatic | 0.000   | 0     |   |
| 3 | 136,463,072 | C | T | EPHB1           | 3 | 3_prime_flanking_region     | 332  | 8   | 2.35  | 245   | 187 | 43.29 | 43.29 | Somatic | 0.000   | 177   | 151 | 46.04 | 46.04 | Somatic | 0.000   | 1     |   |
| 3 | 158,727,296 | T | A | C3orf55         | 3 | 5_prime_flanking_region     | 545  | 25  | 4.39  | 313   | 272 | 46.50 | 46.50 | Somatic | 0.000   | 256   | 205 | 44.47 | 44.47 | Somatic | 0.000   | 1     |   |
| 3 | 163,509,409 | G | C |                 | 0 | 3                           | 815  | 7   | 2.17  | 549   | 459 | 45.54 | 45.54 | Somatic | 0.000   | 381   | 349 | 47.81 | 47.81 | Somatic | 0.000   | 1     |   |
| 3 | 166,201,621 | C | T | SI              | 3 | intronic                    | 39   | 3   | 3.26  | 152   | 122 | 44.53 | 44.53 | Somatic | 0.000   | 109   | 83  | 43.23 | 43.23 | Somatic | 0.000   | 1     |   |
| 3 | 170,819,805 | C | T | MDS1            | 3 | intronic                    | 687  | 20  | 2.83  | 683   | 638 | 48.30 | 48.30 | Somatic | 0.000   | 312   | 250 | 44.48 | 44.48 | Somatic | 0.000   | 1     |   |
| 3 | 173,529,456 | C | A | FNDC3B          | 1 | missense                    | 262  | 2   | 0.76  | 439   | 356 | 44.78 | 44.78 | Somatic | 0.000   | 219   | 146 | 40.00 | 40.00 | Somatic | 0.000   | 0     |   |
| 3 | 177,936,424 | A | T | ENSG00000208490 | 3 | 5_prime_flanking_region     | 614  | 30  | 4.66  | 602   | 426 | 41.44 | 41.44 | Somatic | 0.000   | 460   | 380 | 45.24 | 45.24 | Somatic | 0.000   | 1     |   |
| 3 | 188,400,850 | C | A | RTP1            | 3 | 3_prime_untranslated_region | 341  | 5   | 1.45  | 405   | 383 | 48.60 | 48.60 | Somatic | 0.000   | 278   | 215 | 43.61 | 43.61 | Somatic | 0.000   | 1     |   |
| 4 | 2,261,310   | G | A | ZFYVE28         | 2 | intronic                    | 131  | 11  | 7.75  | 37    | 26  | 41.27 | 41.27 | Somatic | 0.000   | 283   | 249 | 46.80 | 46.80 | Somatic | 0.000   | 1     |   |
| 4 | 7,365,576   | T | A | SORCS2          | 3 | intronic                    | 1048 | 8   | 0.76  | 270   | 3   | 1.10  | 1.10  | Somatic | 0.401   | 446   | 117 | 20.78 | 20.78 | Somatic | 0.000   | 2     |   |
| 4 | 7,395,182   | A | T | SORCS2          | 3 | intronic                    | 148  | 3   | 1.99  | 113   | 97  | 46.19 | 46.19 | Somatic | 0.000   | 121   | 130 | 51.79 | 51.79 | Somatic | 0.000   | 1     |   |
| 4 | 16,550,472  | C | T | LDB2            | 3 | 5_prime_flanking_region     | 241  | 14  | 5.49  | 252   | 214 | 45.92 | 45.92 | Somatic | 0.000   | 229   | 213 | 48.19 | 48.19 | Somatic | 0.000   | 1     |   |
| 4 | 18,139,490  | C | T | ENSG00000209956 | 3 | 3_prime_flanking_region     | 392  | 25  | 6.00  | 687   | 531 | 43.60 | 43.60 | Somatic | 0.000   | 305   | 224 | 42.34 | 42.34 | Somatic | 0.000   | 1     |   |
| 4 | 22,362,173  | A | G | GBA3            | 3 | intronic                    | 1156 | 44  | 3.67  | 896   | 834 | 48.21 | 48.21 | Somatic | 0.000   | 371   | 366 | 49.66 | 49.66 | Somatic | 0.000   | 1     |   |
| 4 | 29,185,860  | G | A |                 | 0 | 3                           | 304  | 11  | 3.49  | 536   | 498 | 48.16 | 48.16 | Somatic | 0.000   | 344   | 313 | 47.64 | 47.64 | Somatic | 0.000   | 1     |   |
| 4 | 29,629,786  | G | A |                 | 0 | 3                           | 397  | 3   | 0.75  | 378   | 266 | 41.30 | 41.30 | Somatic | 0.000   | 273   | 199 | 42.16 | 42.16 | Somatic | 0.000   | 1     |   |
| 4 | 31,623,175  | A | G | LOC100133713    | 3 | 5_prime_flanking_region     | 246  | 15  | 5.75  | 264   | 253 | 48.94 | 48.94 | Somatic | 0.000   | 316   | 315 | 49.92 | 49.92 | Somatic | 0.000   | 1     |   |
| 4 | 32,768,631  | G | A |                 | 0 | 3                           | 398  | 15  | 3.63  | 653   | 505 | 43.61 | 43.61 | Somatic | 0.000   | 307   | 268 | 46.61 | 46.61 | Somatic | 0.000   | 1     |   |
| 4 | 36,443,632  | T | A |                 | 0 | 3                           | 374  | 16  | 4.10  | 365   | 341 | 48.30 | 48.30 | Somatic | 0.000   | 382   | 293 | 43.41 | 43.41 | Somatic | 0.000   | 1     |   |
| 4 | 43,458,657  | C | T |                 | 0 | 3                           | 104  | 3   | 2.80  | 138   | 88  | 38.94 | 38.94 | Somatic | 0.000   | 209   | 186 | 47.09 | 47.09 | Somatic | 0.000   | 1     |   |
| 4 | 44,155,349  | C | T | KCTD8           | 3 | 5_prime_flanking_region     | 1221 | 18  | 1.45  | 614   | 514 | 45.57 | 45.57 | Somatic | 0.000   | 437   | 365 | 45.51 | 45.51 | Somatic | 0.000   | 1     |   |
| 4 | 63,541,472  | C | A |                 | 0 | 3                           | 268  | 1   | 0.37  | 410   | 315 | 43.45 | 43.45 | Somatic | 0.000   | 287   | 221 | 43.50 | 43.50 | Somatic | 0.000   | 1     |   |
| 4 | 77,073,409  | T | C | NAAA            | 3 | intronic                    | 79   | 2   | 2.47  | 57    | 55  | 49.11 | 49.11 | Somatic | 0.000   | 188   | 147 | 43.88 | 43.88 | Somatic | 0.000   | 1     |   |
| 4 | 86,518,791  | A | C |                 | 0 | 2                           | 805  | 62  | 7.15  | 574   | 503 | 46.70 | 46.70 | Somatic | 0.000   | 410   | 346 | 45.77 | 45.77 | Somatic | 0.000   | 1     |   |
| 4 | 110,783,030 | T | G | CCDC109B        | 2 | intronic                    | 784  | 63  | 7.44  | 1497  | 250 | 14.31 | 14.31 | Somatic | 0.000   | 512   | 201 | 28.19 | 28.19 | Somatic | 0.000   | 0     |   |
| 4 | 112,604,557 | G | A |                 | 0 | 3                           | 193  | 7   | 3.50  | 418   | 416 | 49.88 | 49.88 | Somatic | 0.000   | 263   | 226 | 46.22 | 46.22 | Somatic | 0.000   | 1     |   |
| 4 | 118,188,338 | A | G | TRAM1L1         | 3 | 3_prime_flanking_region     | 551  | 32  | 5.49  | 392   | 397 | 50.32 | 50.32 | Somatic | 0.000   | 297   | 263 | 46.96 | 46.96 | Somatic | 0.000   | 1     |   |
| 4 | 125,746,802 | G | A |                 | 0 | 3                           | 372  | 9   | 2.36  | 677   | 499 | 42.43 | 42.43 | Somatic | 0.000   | 295   | 220 | 42.72 | 42.72 | Somatic | 0.000   | 1     |   |
| 4 | 126,682,546 | A | T | FAT4            | 3 | 3_prime_flanking_region     | 561  | 15  | 2.60  | 506   | 477 | 48.52 | 48.52 | Somatic | 0.000   | 424   | 431 | 50.41 | 50.41 | Somatic | 0.000   | 1     |   |
| 4 | 128,277,343 | C | T |                 | 0 | 3                           | 637  | 24  | 3.63  | 843   | 699 | 45.33 | 45.33 | Somatic | 0.000   | 360   | 347 | 49.08 | 49.08 | Somatic | 0.000   | 1     |   |
| 4 | 132,318,397 | C | T |                 | 0 | 3                           | 273  | 10  | 3.53  | 410   | 324 | 44.14 | 44.14 | Somatic | 0.000   | 336   | 205 | 37.89 | 37.89 | Somatic | 0.000   | 0     |   |
| 4 | 136,046,582 | T | A | LOC646272       | 3 | 5_prime_flanking_region     | 585  | 12  | 2.01  | 456   | 243 | 34.76 | 34.76 | Somatic | 0.000   | 281   | 234 | 45.44 | 45.44 | Somatic | 0.000   | 0     |   |
| 4 | 136,492,542 | G | A | ENSG00000207188 | 3 | 5_prime_flanking_region     | 62   | 2   | 3.13  | 182   | 130 | 41.67 | 41.67 | Somatic | 0.000   | 183   | 145 | 44.21 | 44.21 | Somatic | 0.000   | 1     |   |
| 4 | 137,716,185 | C | T |                 | 0 | 2                           | 400  | 14  | 3.38  | 269   | 229 | 45.98 | 45.98 | Somatic | 0.000   | 293   | 273 | 48.23 | 48.23 | Somatic | 0.000   | 1     |   |
| 4 | 139,423,585 | T | A | SLC7A11         | 2 | 5_prime_flanking_region     | 46   | 1   | 2.13  | 57    | 61  | 51.69 | 51.69 | Somatic | 0.000   | 39    | 30  | 43.48 | 43.48 | Somatic | 0.000   | 1     |   |
| 4 | 145,369,376 | C | T |                 | 0 | 3                           | 473  | 21  | 4.25  | 375   | 302 | 44.61 | 44.61 | Somatic | 0.000   | 252   | 213 | 45.81 | 45.81 | Somatic | 0.000   | 1     |   |
| 4 | 146,313,010 | T | C | OTUD4           | 3 | intronic                    | 335  | 15  | 4.29  | 387   | 429 | 52.57 | 52.57 | Somatic | 0.000   | 306   | 326 | 51.58 | 51.58 | Somatic | 0.000   | 1     |   |
| 4 | 155,766,017 | C | T | FGA             | 3 | 5_prime_flanking_region     | 693  | 13  | 1.84  | 661   | 581 | 46.78 | 46.78 | Somatic | 0.000   | 433   | 395 | 47.71 | 47.71 | Somatic | 0.000   | 1     |   |
| 4 | 161,787,610 | C | T |                 | 0 | 3                           | 830  | 36  | 4.16  | 742   | 5   |       |       |         |         |       |     |       |       |         |         |       |   |

|   |             |   |   |                 |   |                             |   |      |    |      |      |      |       |       |         |       |     |     |       |       |         |       |   |
|---|-------------|---|---|-----------------|---|-----------------------------|---|------|----|------|------|------|-------|-------|---------|-------|-----|-----|-------|-------|---------|-------|---|
| 5 | 51,503,256  | G | A |                 | 0 | 2                           | 0 | 571  | 25 | 4.19 | 523  | 486  | 48.17 | 48.17 | Somatic | 0.000 | 358 | 330 | 47.97 | 47.97 | Somatic | 0.000 | 1 |
| 5 | 68,314,881  | T | A | ENSG00000222762 | 3 | 5_prime_flanking_region     |   | 328  | 16 | 4.65 | 679  | 591  | 46.54 | 46.54 | Somatic | 0.000 | 300 | 285 | 48.72 | 48.72 | Somatic | 0.000 | 1 |
| 5 | 71,888,102  | G | A | ZNF366          | 2 | 5_prime_flanking_region     |   | 549  | 16 | 2.83 | 444  | 345  | 43.73 | 43.73 | Somatic | 0.000 | 301 | 254 | 45.77 | 45.77 | Somatic | 0.000 | 1 |
| 5 | 89,673,080  | A | T |                 | 0 | 3                           | 0 | 302  | 18 | 5.63 | 341  | 327  | 48.95 | 48.95 | Somatic | 0.000 | 258 | 234 | 47.56 | 47.56 | Somatic | 0.000 | 1 |
| 5 | 92,816,744  | G | A |                 | 0 | 3                           | 0 | 499  | 17 | 3.29 | 423  | 349  | 45.21 | 45.21 | Somatic | 0.000 | 382 | 338 | 46.94 | 46.94 | Somatic | 0.000 | 1 |
| 5 | 96,065,480  | A | G | CAST            | 2 | intronic                    |   | 278  | 5  | 1.77 | 255  | 251  | 49.60 | 49.60 | Somatic | 0.000 | 320 | 325 | 50.39 | 50.39 | Somatic | 0.000 | 1 |
| 5 | 100,118,060 | T | C | ENSG00000207269 | 3 | 3_prime_flanking_region     |   | 504  | 17 | 3.26 | 343  | 326  | 48.73 | 48.73 | Somatic | 0.000 | 346 | 311 | 47.34 | 47.34 | Somatic | 0.000 | 1 |
| 5 | 113,227,599 | C | T |                 | 0 | 3                           | 0 | 624  | 28 | 4.29 | 663  | 547  | 45.21 | 45.21 | Somatic | 0.000 | 322 | 306 | 48.73 | 48.73 | Somatic | 0.000 | 1 |
| 5 | 117,884,100 | G | A |                 | 0 | 3                           | 0 | 782  | 0  | 0.00 | 1820 | 51   | 2.73  | 2.73  | Somatic | 0.000 | 714 | 194 | 21.37 | 21.37 | Somatic | 0.000 | 2 |
| 5 | 123,015,301 | C | T | ENSG00000208978 | 3 | 5_prime_flanking_region     |   | 815  | 26 | 3.09 | 821  | 687  | 45.56 | 45.56 | Somatic | 0.000 | 406 | 335 | 45.21 | 45.21 | Somatic | 0.000 | 1 |
| 5 | 123,877,689 | C | T |                 | 0 | 2                           | 0 | 313  | 12 | 3.69 | 172  | 122  | 41.50 | 41.50 | Somatic | 0.000 | 280 | 234 | 45.53 | 45.53 | Somatic | 0.000 | 1 |
| 5 | 132,897,276 | C | T | FSTL4           | 3 | intronic                    |   | 595  | 16 | 2.62 | 922  | 804  | 46.58 | 46.58 | Somatic | 0.000 | 433 | 360 | 45.40 | 45.40 | Somatic | 0.000 | 1 |
| 5 | 140,439,825 | T | C | PCDHB2          | 3 | 5_prime_flanking_region     |   | 349  | 13 | 3.59 | 250  | 186  | 42.66 | 42.66 | Somatic | 0.000 | 384 | 359 | 48.32 | 48.32 | Somatic | 0.000 | 1 |
| 5 | 140,469,201 | G | T | PCDHB5          | 3 | 5_prime_flanking_region     |   | 1075 | 33 | 2.98 | 195  | 146  | 42.82 | 42.82 | Somatic | 0.000 | 383 | 345 | 47.39 | 47.39 | Somatic | 0.000 | 1 |
| 5 | 147,696,652 | G | A | SPINK9          | 3 | intronic                    |   | 530  | 18 | 3.28 | 665  | 573  | 46.28 | 46.28 | Somatic | 0.000 | 342 | 353 | 50.79 | 50.79 | Somatic | 0.000 | 1 |
| 5 | 148,880,083 | T | G | CSNK1A1         | 1 | missense                    |   | 531  | 13 | 2.39 | 473  | 450  | 48.75 | 48.75 | Somatic | 0.000 | 379 | 326 | 46.24 | 46.24 | Somatic | 0.000 | 1 |
| 5 | 149,525,443 | T | C | PDGFRB          | 3 | 5_prime_flanking_region     |   | 262  | 4  | 1.50 | 172  | 7    | 3.91  | 3.91  | Somatic | 0.168 | 529 | 106 | 16.69 | 16.69 | Somatic | 0.000 | 0 |
| 5 | 160,513,086 | G | A |                 | 0 | 3                           | 0 | 327  | 17 | 4.94 | 238  | 183  | 43.47 | 43.47 | Somatic | 0.000 | 295 | 251 | 45.97 | 45.97 | Somatic | 0.000 | 1 |
| 5 | 162,193,041 | C | A | ENSG00000208481 | 3 | 3_prime_flanking_region     |   | 452  | 5  | 1.09 | 433  | 333  | 43.47 | 43.47 | Somatic | 0.000 | 325 | 250 | 43.48 | 43.48 | Somatic | 0.000 | 1 |
| 5 | 164,071,958 | G | A |                 | 0 | 3                           | 0 | 576  | 18 | 3.03 | 581  | 494  | 45.95 | 45.95 | Somatic | 0.000 | 417 | 415 | 49.88 | 49.88 | Somatic | 0.000 | 1 |
| 5 | 165,820,268 | C | A |                 | 0 | 3                           | 0 | 790  | 37 | 4.47 | 768  | 743  | 49.17 | 49.17 | Somatic | 0.000 | 456 | 454 | 49.89 | 49.89 | Somatic | 0.000 | 1 |
| 5 | 166,002,175 | C | A |                 | 0 | 2                           | 0 | 561  | 17 | 2.94 | 586  | 460  | 43.98 | 43.98 | Somatic | 0.000 | 372 | 328 | 46.86 | 46.86 | Somatic | 0.000 | 1 |
| 6 | 900,039     | T | C | LOC730397       | 3 | 5_prime_flanking_region     |   | 304  | 12 | 3.80 | 399  | 400  | 50.06 | 50.06 | Somatic | 0.000 | 347 | 276 | 44.30 | 44.30 | Somatic | 0.000 | 1 |
| 6 | 5,996,224   | G | A | NRN1            | 3 | 5_prime_flanking_region     |   | 606  | 15 | 2.42 | 517  | 562  | 52.09 | 52.09 | Somatic | 0.000 | 360 | 294 | 44.95 | 44.95 | Somatic | 0.000 | 1 |
| 6 | 6,260,424   | C | T | F13A1           | 3 | intronic                    |   | 483  | 12 | 2.42 | 404  | 344  | 45.99 | 45.99 | Somatic | 0.000 | 411 | 402 | 49.45 | 49.45 | Somatic | 0.000 | 1 |
| 6 | 9,584,137   | C | T |                 | 0 | 2                           | 0 | 1427 | 97 | 6.36 | 962  | 905  | 48.47 | 48.47 | Somatic | 0.000 | 503 | 470 | 48.30 | 48.30 | Somatic | 0.000 | 1 |
| 6 | 12,118,719  | G | T | HIVEP1          | 2 | 5_prime_flanking_region     |   | 246  | 6  | 2.38 | 261  | 208  | 44.35 | 44.35 | Somatic | 0.000 | 307 | 287 | 48.32 | 48.32 | Somatic | 0.000 | 1 |
| 6 | 23,624,936  | C | T |                 | 0 | 3                           | 0 | 163  | 6  | 3.55 | 224  | 220  | 49.55 | 49.55 | Somatic | 0.000 | 260 | 216 | 45.38 | 45.38 | Somatic | 0.000 | 1 |
| 6 | 33,967,359  | C | G | LOC100132252    | 3 | 3_prime_flanking_region     |   | 268  | 15 | 5.30 | 89   | 94   | 51.37 | 51.37 | Somatic | 0.000 | 336 | 269 | 44.46 | 44.46 | Somatic | 0.000 | 1 |
| 6 | 44,532,555  | C | T | LOC100128935    | 2 | 5_prime_flanking_region     |   | 483  | 26 | 5.11 | 392  | 336  | 46.15 | 46.15 | Somatic | 0.000 | 224 | 227 | 50.33 | 50.33 | Somatic | 0.000 | 1 |
| 6 | 45,133,962  | A | C | SUPT3H          | 3 | intronic                    |   | 492  | 21 | 4.09 | 783  | 649  | 45.32 | 45.32 | Somatic | 0.000 | 339 | 274 | 44.70 | 44.70 | Somatic | 0.000 | 1 |
| 6 | 51,440,235  | T | C | ENSG00000212532 | 3 | 3_prime_flanking_region     |   | 396  | 14 | 3.41 | 349  | 277  | 44.25 | 44.25 | Somatic | 0.000 | 253 | 201 | 44.27 | 44.27 | Somatic | 0.000 | 1 |
| 6 | 54,067,267  | T | G | C6orf142        | 3 | intronic                    |   | 287  | 19 | 6.21 | 253  | 215  | 45.94 | 45.94 | Somatic | 0.000 | 266 | 225 | 45.82 | 45.82 | Somatic | 0.000 | 1 |
| 6 | 77,277,763  | C | T | LOC643281       | 3 | 3_prime_flanking_region     |   | 175  | 10 | 5.41 | 278  | 276  | 49.82 | 49.82 | Somatic | 0.000 | 290 | 230 | 44.23 | 44.23 | Somatic | 0.000 | 1 |
| 6 | 85,673,094  | G | A |                 | 0 | 3                           | 0 | 621  | 7  | 1.11 | 566  | 546  | 49.10 | 49.10 | Somatic | 0.000 | 226 | 210 | 48.17 | 48.17 | Somatic | 0.000 | 1 |
| 6 | 89,065,419  | C | T | ENSG00000220267 | 3 | 5_prime_flanking_region     |   | 980  | 46 | 4.48 | 928  | 868  | 48.33 | 48.33 | Somatic | 0.000 | 448 | 432 | 49.09 | 49.09 | Somatic | 0.000 | 1 |
| 6 | 91,891,502  | G | T |                 | 0 | 2                           | 0 | 786  | 31 | 3.79 | 644  | 494  | 43.41 | 43.41 | Somatic | 0.000 | 367 | 338 | 47.94 | 47.94 | Somatic | 0.000 | 1 |
| 6 | 95,400,882  | C | T |                 | 0 | 3                           | 0 | 632  | 0  | 0.00 | 864  | 14   | 1.59  | 1.59  | Somatic | 0.000 | 499 | 115 | 18.73 | 18.73 | Somatic | 0.000 | 2 |
| 6 | 105,713,110 | C | A | POPDC3          | 1 | missense                    |   | 174  | 8  | 4.40 | 175  | 138  | 44.09 | 44.09 | Somatic | 0.000 | 246 | 211 | 46.17 | 46.17 | Somatic | 0.000 | 1 |
| 6 | 113,767,508 | C | T |                 | 0 | 3                           | 0 | 821  | 5  | 0.61 | 745  | 615  | 45.22 | 45.22 | Somatic | 0.000 | 362 | 266 | 42.36 | 42.36 | Somatic | 0.000 | 1 |
| 6 | 125,900,869 | G | A |                 | 0 | 3                           | 0 | 400  | 3  | 0.74 | 341  | 254  | 42.69 | 42.69 | Somatic | 0.000 | 344 | 263 | 43.33 | 43.33 | Somatic | 0.000 | 1 |
| 6 | 133,329,889 | T | C | ENSG00000213122 | 3 | 3_prime_flanking_region     |   | 244  | 8  | 3.17 | 447  | 370  | 45.29 | 45.29 | Somatic | 0.000 | 262 | 208 | 44.26 | 44.26 | Somatic | 0.000 | 1 |
| 6 | 134,376,650 | C | G | SLC2A12         | 3 | intronic                    |   | 325  | 10 | 2.99 | 522  | 379  | 42.06 | 42.06 | Somatic | 0.000 | 264 | 250 | 48.64 | 48.64 | Somatic | 0.000 | 1 |
| 6 | 135,937,118 | C | T | ENSG00000213112 | 3 | 3_prime_flanking_region     |   | 383  | 8  | 2.05 | 413  | 364  | 46.85 | 46.85 | Somatic | 0.000 | 346 | 292 | 45.77 | 45.77 | Somatic | 0.000 | 1 |
| 6 | 137,632,989 | G | A |                 | 0 | 3                           | 0 | 677  | 32 | 4.51 | 363  | 305  | 45.66 | 45.66 | Somatic | 0.000 | 220 | 246 | 52.79 | 52.79 | Somatic | 0.000 | 1 |
| 6 | 138,308,151 | T | C | ENSG00000219463 | 3 | 5_prime_flanking_region     |   | 1695 | 93 | 5.20 | 1166 | 1159 | 49.85 | 49.85 | Somatic | 0.000 | 404 | 436 | 51.90 | 51.90 | Somatic | 0.000 | 1 |
| 6 | 146,176,900 | G | T | FBXO30          | 2 | intronic                    |   | 415  | 8  | 1.89 | 492  | 391  | 44.28 | 44.28 | Somatic | 0.000 | 378 | 325 | 46.23 | 46.23 | Somatic | 0.000 | 1 |
| 6 | 150,184,625 | C | T | LRP11           | 2 | intronic                    |   | 389  | 8  | 2.02 | 320  | 271  | 45.85 | 45.85 | Somatic | 0.000 | 316 | 309 | 49.44 | 49.44 | Somatic | 0.000 | 1 |
| 6 | 162,878,522 | C | T | PARK2           | 3 | intronic                    |   | 690  | 17 | 2.40 | 561  | 488  | 46.52 | 46.52 | Somatic | 0.000 | 384 | 322 | 45.61 | 45.61 | Somatic | 0.000 | 1 |
| 6 | 166,045,320 | A | G | PDE10A          | 3 | 5_prime_flanking_region     |   | 171  | 8  | 4.47 | 79   | 60   | 43.17 | 43.17 | Somatic | 0.000 | 344 | 334 | 49.26 | 49.26 | Somatic | 0.000 | 1 |
| 7 | 14,766,804  | G | A | DGKB            | 3 | intronic                    |   | 311  | 3  | 0.96 | 435  | 376  | 46.36 | 46.36 | Somatic | 0.000 | 398 | 285 | 41.73 | 41.73 | Somatic | 0.000 | 1 |
| 7 | 19,322,718  | C | T |                 | 0 | 3                           | 0 | 325  | 16 | 4.69 | 236  | 195  | 45.24 | 45.24 | Somatic | 0.000 | 243 | 197 | 44.77 | 44.77 | Somatic | 0.000 | 1 |
| 7 | 23,245,489  | G | A | GNPMB           | 2 | 5_prime_flanking_region     |   | 1053 | 56 | 5.05 | 409  | 367  | 47.29 | 47.29 | Somatic | 0.000 | 249 | 249 | 50.00 | 50.00 | Somatic | 0.000 | 1 |
| 7 | 40,891,373  | G | A | C7orf10         | 3 | 3_prime_flanking_region     |   | 374  | 15 | 3.86 | 405  | 346  | 46.07 | 46.07 | Somatic | 0.000 | 342 | 327 | 48.88 | 48.88 | Somatic | 0.000 | 1 |
| 7 | 41,710,975  | T | C | INHBA           | 2 | 5_prime_flanking_region     |   | 633  | 48 | 7.05 | 375  | 318  | 45.89 | 45.89 | Somatic | 0.000 | 287 | 309 | 51.85 | 51.85 | Somatic | 0.000 | 1 |
| 7 | 42,368,306  | C | T |                 | 0 | 3                           | 0 | 866  | 27 | 3.02 | 604  | 436  | 41.92 | 41.92 | Somatic | 0.000 | 385 | 303 | 44.04 | 44.04 | Somatic | 0.000 | 1 |
| 7 | 44,255,955  | C | T | CAMK2B          | 2 | intronic                    |   | 305  | 0  | 0.00 | 200  | 5    | 2.44  | 2.44  | Somatic | 0.040 | 460 | 118 | 20.42 | 20.42 | Somatic | 0.000 | 2 |
| 7 | 49,636,687  | C | T |                 | 0 | 3                           | 0 | 830  | 30 | 3.49 | 1210 | 1124 | 48.16 | 48.16 | Somatic | 0.000 | 395 | 304 | 43.49 | 43.49 | Somatic | 0.000 | 1 |
| 7 | 50,762,444  | A | G | GRB10           | 3 | intronic                    |   | 608  | 2  | 0.33 | 709  | 17   | 2.34  | 2.34  | Somatic | 0.001 | 482 | 124 | 20.46 | 20.46 | Somatic | 0.000 | 2 |
| 7 | 51,944,112  | C | A |                 | 0 | 3                           | 0 | 710  | 0  | 0.00 | 789  | 45   | 5.40  | 5.40  | Somatic | 0.000 | 433 | 156 | 26.49 | 26.49 | Somatic | 0.000 | 0 |
| 7 | 67,497,348  | G | A |                 | 0 | 3                           | 0 | 680  | 17 | 2.44 | 515  | 483  | 48.40 | 48.40 | Somatic | 0.000 | 380 | 354 | 48.23 | 48.23 | Somatic | 0.000 | 1 |
| 7 | 91,954,454  | T | C | PEX1            | 3 | 3_prime_untranslated_region |   | 116  | 2  | 1.69 | 293  | 322  | 52.36 | 52.36 | Somatic | 0.000 | 170 | 161 | 48.64 | 48.64 | Somatic | 0.000 | 1 |
| 7 | 104,632,275 | C | A | SRPK2           | 3 | intronic                    |   | 949  | 50 | 5.01 | 723  | 643  | 47.07 | 47.07 | Somatic | 0.000 | 313 |     |       |       |         |       |   |

|    |             |   |   |                 |   |                             |      |    |       |      |      |       |       |         |       |     |     |       |       |         |       |   |
|----|-------------|---|---|-----------------|---|-----------------------------|------|----|-------|------|------|-------|-------|---------|-------|-----|-----|-------|-------|---------|-------|---|
| 8  | 36,228,367  | G | A | ENSG00000210631 | 3 | 5_prime_flanking_region     | 451  | 20 | 4.25  | 704  | 599  | 45.97 | 45.97 | Somatic | 0.000 | 296 | 244 | 45.19 | 45.19 | Somatic | 0.000 | 1 |
| 8  | 39,742,880  | T | A | ADAM2           | 3 | intronic                    | 210  | 11 | 4.98  | 404  | 287  | 41.53 | 41.53 | Somatic | 0.000 | 284 | 204 | 41.80 | 41.80 | Somatic | 0.000 | 1 |
| 8  | 52,586,888  | C | T | PXDNL           | 3 | intronic                    | 1045 | 33 | 3.06  | 530  | 504  | 48.74 | 48.74 | Somatic | 0.000 | 400 | 377 | 48.52 | 48.52 | Somatic | 0.000 | 1 |
| 8  | 66,534,946  | A | T |                 | 0 | 2                           | 905  | 44 | 4.64  | 590  | 493  | 45.52 | 45.52 | Somatic | 0.000 | 461 | 403 | 46.64 | 46.64 | Somatic | 0.000 | 1 |
| 8  | 68,491,540  | A | G | CPA6            | 3 | 3_prime_flanking_region     | 61   | 2  | 3.17  | 118  | 116  | 49.57 | 49.57 | Somatic | 0.000 | 225 | 215 | 48.86 | 48.86 | Somatic | 0.000 | 1 |
| 8  | 70,103,300  | G | A | LOC100129096    | 2 | intronic                    | 143  | 1  | 0.69  | 254  | 203  | 44.42 | 44.42 | Somatic | 0.000 | 315 | 281 | 47.15 | 47.15 | Somatic | 0.000 | 1 |
| 8  | 75,925,059  | T | C | P115            | 3 | 3_prime_untranslated_region | 440  | 16 | 3.51  | 391  | 388  | 49.81 | 49.81 | Somatic | 0.000 | 321 | 344 | 51.73 | 51.73 | Somatic | 0.000 | 1 |
| 8  | 77,914,894  | C | G | ZFH4            | 2 | intronic                    | 506  | 16 | 3.07  | 801  | 781  | 49.37 | 49.37 | Somatic | 0.000 | 258 | 286 | 52.57 | 52.57 | Somatic | 0.000 | 1 |
| 8  | 84,408,136  | G | A |                 | 0 | 3                           | 634  | 45 | 6.63  | 758  | 690  | 47.65 | 47.65 | Somatic | 0.000 | 459 | 428 | 48.25 | 48.25 | Somatic | 0.000 | 1 |
| 8  | 85,565,386  | G | A | RALYL           | 3 | intronic                    | 618  | 34 | 5.21  | 414  | 382  | 47.99 | 47.99 | Somatic | 0.000 | 184 | 179 | 49.31 | 49.31 | Somatic | 0.000 | 1 |
| 8  | 86,568,817  | T | G | CA2             | 3 | intronic                    | 202  | 18 | 8.18  | 192  | 196  | 50.52 | 50.52 | Somatic | 0.000 | 267 | 262 | 49.53 | 49.53 | Somatic | 0.000 | 1 |
| 8  | 87,836,982  | T | A | CNG83           | 3 | 5_prime_flanking_region     | 424  | 13 | 2.97  | 319  | 190  | 37.33 | 37.33 | Somatic | 0.000 | 287 | 238 | 45.33 | 45.33 | Somatic | 0.000 | 1 |
| 8  | 88,641,249  | C | T |                 | 0 | 3                           | 641  | 13 | 1.99  | 753  | 711  | 48.57 | 48.57 | Somatic | 0.000 | 330 | 272 | 45.18 | 45.18 | Somatic | 0.000 | 1 |
| 8  | 90,190,284  | C | T |                 | 0 | 3                           | 308  | 6  | 1.91  | 326  | 252  | 43.60 | 43.60 | Somatic | 0.000 | 281 | 241 | 46.17 | 46.17 | Somatic | 0.000 | 1 |
| 8  | 93,512,629  | G | A |                 | 0 | 3                           | 537  | 11 | 2.01  | 231  | 218  | 48.55 | 48.55 | Somatic | 0.000 | 353 | 311 | 46.84 | 46.84 | Somatic | 0.000 | 1 |
| 8  | 94,755,932  | G | A | FAM92A1         | 3 | 5_prime_flanking_region     | 356  | 6  | 1.66  | 416  | 387  | 48.19 | 48.19 | Somatic | 0.000 | 427 | 335 | 43.96 | 43.96 | Somatic | 0.000 | 1 |
| 8  | 111,759,719 | C | G |                 | 0 | 3                           | 368  | 5  | 1.34  | 436  | 457  | 51.18 | 51.18 | Somatic | 0.000 | 320 | 301 | 48.47 | 48.47 | Somatic | 0.000 | 1 |
| 8  | 115,838,142 | G | A |                 | 0 | 3                           | 315  | 16 | 4.83  | 432  | 316  | 42.25 | 42.25 | Somatic | 0.000 | 330 | 298 | 47.45 | 47.45 | Somatic | 0.000 | 1 |
| 8  | 128,300,749 | C | T |                 | 0 | 2                           | 1013 | 18 | 1.75  | 873  | 773  | 46.96 | 46.96 | Somatic | 0.000 | 422 | 347 | 45.12 | 45.12 | Somatic | 0.000 | 1 |
| 8  | 129,958,522 | A | G |                 | 0 | 2                           | 437  | 20 | 4.38  | 416  | 356  | 46.11 | 46.11 | Somatic | 0.000 | 411 | 400 | 49.32 | 49.32 | Somatic | 0.000 | 1 |
| 8  | 131,851,617 | C | T | ADCY8           | 3 | 3_prime_flanking_region     | 1767 | 45 | 2.48  | 1215 | 1061 | 46.62 | 46.62 | Somatic | 0.000 | 465 | 418 | 47.34 | 47.34 | Somatic | 0.000 | 1 |
| 8  | 139,813,942 | G | A | COL22A1         | 3 | intronic                    | 1021 | 50 | 4.67  | 352  | 348  | 49.71 | 49.71 | Somatic | 0.000 | 310 | 299 | 49.10 | 49.10 | Somatic | 0.000 | 1 |
| 8  | 142,815,582 | G | A |                 | 0 | 3                           | 140  | 4  | 2.78  | 62   | 57   | 47.90 | 47.90 | Somatic | 0.000 | 245 | 256 | 51.10 | 51.10 | Somatic | 0.000 | 1 |
| 8  | 143,778,000 | A | C | LY6K            | 2 | 5_prime_flanking_region     | 219  | 31 | 12.40 | 100  | 32   | 24.24 | 24.24 | Somatic | 0.296 | 310 | 314 | 50.32 | 50.32 | Somatic | 0.000 | 0 |
| 9  | 7,463,965   | A | G | LOC158345       | 3 | 3_prime_flanking_region     | 876  | 40 | 4.37  | 815  | 743  | 47.69 | 47.69 | Somatic | 0.000 | 412 | 366 | 47.04 | 47.04 | Somatic | 0.000 | 1 |
| 9  | 9,091,885   | C | T | PTPRD           | 3 | intronic                    | 59   | 0  | 0.00  | 78   | 72   | 48.00 | 48.00 | Somatic | 0.000 | 158 | 126 | 44.37 | 44.37 | Somatic | 0.000 | 1 |
| 9  | 24,383,946  | T | C |                 | 0 | 3                           | 403  | 31 | 7.14  | 439  | 368  | 45.60 | 45.60 | Somatic | 0.000 | 268 | 268 | 50.00 | 50.00 | Somatic | 0.000 | 1 |
| 9  | 25,082,867  | C | T | ENSG00000222693 | 3 | 5_prime_flanking_region     | 283  | 15 | 5.03  | 439  | 392  | 47.17 | 47.17 | Somatic | 0.000 | 318 | 282 | 47.00 | 47.00 | Somatic | 0.000 | 1 |
| 9  | 26,311,659  | C | T |                 | 0 | 3                           | 712  | 20 | 2.73  | 527  | 407  | 43.58 | 43.58 | Somatic | 0.000 | 348 | 280 | 44.59 | 44.59 | Somatic | 0.000 | 1 |
| 9  | 28,033,354  | A | G | LINGO2          | 3 | intronic                    | 1342 | 56 | 4.01  | 793  | 709  | 47.20 | 47.20 | Somatic | 0.000 | 395 | 303 | 43.41 | 43.41 | Somatic | 0.000 | 1 |
| 9  | 30,430,017  | C | A |                 | 0 | 2                           | 318  | 12 | 3.64  | 602  | 528  | 46.73 | 46.73 | Somatic | 0.000 | 339 | 220 | 39.36 | 39.36 | Somatic | 0.000 | 0 |
| 9  | 30,927,679  | C | T | ENSG00000214020 | 2 | 3_prime_flanking_region     | 370  | 10 | 2.63  | 361  | 308  | 46.04 | 46.04 | Somatic | 0.000 | 296 | 261 | 46.86 | 46.86 | Somatic | 0.000 | 1 |
| 9  | 32,208,802  | T | C |                 | 0 | 3                           | 182  | 6  | 3.19  | 363  | 299  | 45.17 | 45.17 | Somatic | 0.000 | 322 | 290 | 47.39 | 47.39 | Somatic | 0.000 | 1 |
| 9  | 35,669,773  | G | A | CA9             | 3 | intronic                    | 603  | 16 | 2.58  | 57   | 56   | 49.56 | 49.56 | Somatic | 0.000 | 184 | 173 | 48.46 | 48.46 | Somatic | 0.000 | 1 |
| 9  | 36,409,304  | T | A | RNF38           | 3 | 5_prime_flanking_region     | 601  | 8  | 1.31  | 443  | 279  | 38.64 | 38.64 | Somatic | 0.000 | 385 | 311 | 44.68 | 44.68 | Somatic | 0.000 | 1 |
| 9  | 67,834,918  | C | T | ENSG00000219957 | 3 | 5_prime_flanking_region     | 369  | 6  | 1.60  | 327  | 279  | 46.04 | 46.04 | Somatic | 0.000 | 240 | 226 | 48.50 | 48.50 | Somatic | 0.000 | 1 |
| 9  | 89,535,224  | T | G | CTS1L           | 1 | missense                    | 378  | 6  | 1.56  | 303  | 20   | 6.19  | 6.19  | Somatic | 0.170 | 487 | 126 | 20.55 | 20.55 | Somatic | 0.000 | 0 |
| 9  | 90,908,623  | G | A | SHC3            | 2 | intronic                    | 1897 | 92 | 4.63  | 1469 | 1258 | 46.13 | 46.13 | Somatic | 0.000 | 414 | 390 | 48.51 | 48.51 | Somatic | 0.000 | 1 |
| 9  | 97,330,168  | C | T | PTCH1           | 3 | 5_prime_flanking_region     | 787  | 22 | 2.72  | 351  | 288  | 45.07 | 45.07 | Somatic | 0.000 | 315 | 264 | 45.60 | 45.60 | Somatic | 0.000 | 1 |
| 9  | 100,197,933 | C | T | GABBR2          | 3 | intronic                    | 406  | 5  | 1.22  | 127  | 89   | 41.20 | 41.20 | Somatic | 0.000 | 207 | 180 | 46.51 | 46.51 | Somatic | 0.000 | 1 |
| 9  | 100,343,785 | A | G | GABBR2          | 3 | intronic                    | 1249 | 25 | 1.96  | 748  | 734  | 49.53 | 49.53 | Somatic | 0.000 | 476 | 449 | 48.54 | 48.54 | Somatic | 0.000 | 1 |
| 9  | 105,224,758 | G | A |                 | 0 | 3                           | 359  | 13 | 3.49  | 450  | 336  | 42.75 | 42.75 | Somatic | 0.000 | 342 | 284 | 45.37 | 45.37 | Somatic | 0.000 | 1 |
| 9  | 109,348,264 | G | C | ENSG00000216493 | 3 | 5_prime_flanking_region     | 780  | 11 | 1.39  | 326  | 301  | 48.01 | 48.01 | Somatic | 0.000 | 383 | 339 | 46.95 | 46.95 | Somatic | 0.000 | 1 |
| 9  | 122,056,927 | G | A | MIRN147         | 3 | 5_prime_flanking_region     | 794  | 48 | 5.70  | 464  | 400  | 46.30 | 46.30 | Somatic | 0.000 | 314 | 277 | 46.87 | 46.87 | Somatic | 0.000 | 1 |
| 9  | 122,561,326 | T | C | FBXW2           | 3 | 3_prime_untranslated_region | 393  | 12 | 2.96  | 316  | 271  | 46.17 | 46.17 | Somatic | 0.000 | 310 | 318 | 50.64 | 50.64 | Somatic | 0.000 | 1 |
| 9  | 131,535,363 | A | T | PRRX2           | 3 | 3_prime_flanking_region     | 136  | 10 | 6.85  | 31   | 27   | 46.55 | 46.55 | Somatic | 0.000 | 192 | 176 | 47.83 | 47.83 | Somatic | 0.000 | 1 |
| 9  | 133,745,510 | T | A | MED27           | 3 | intronic                    | 313  | 9  | 2.80  | 226  | 197  | 46.57 | 46.57 | Somatic | 0.000 | 330 | 249 | 43.01 | 43.01 | Somatic | 0.000 | 1 |
| 9  | 136,875,556 | G | A | COL5A1          | 3 | 3_prime_untranslated_region | 468  | 13 | 2.70  | 64   | 39   | 37.86 | 37.86 | Somatic | 0.000 | 199 | 174 | 46.65 | 46.65 | Somatic | 0.000 | 1 |
| 9  | 138,867,831 | C | T | MAMDC4          | 1 | silent                      | 15   | 1  | 6.25  | 38   | 25   | 39.68 | 39.68 | Somatic | 0.012 | 217 | 186 | 46.15 | 46.15 | Somatic | 0.001 | 1 |
| 10 | 3,603,767   | C | T | LOC100134102    | 3 | 5_prime_flanking_region     | 415  | 15 | 3.49  | 289  | 212  | 42.32 | 42.32 | Somatic | 0.000 | 302 | 273 | 47.48 | 47.48 | Somatic | 0.000 | 1 |
| 10 | 4,156,953   | T | G | LOC731787       | 3 | 3_prime_flanking_region     | 494  | 12 | 3.27  | 1854 | 63   | 3.29  | 3.29  | Somatic | 0.475 | 411 | 119 | 22.45 | 22.45 | Somatic | 0.000 | 2 |
| 10 | 11,030,362  | C | T |                 | 0 | 3                           | 998  | 37 | 3.57  | 675  | 641  | 48.71 | 48.71 | Somatic | 0.000 | 335 | 257 | 43.41 | 43.41 | Somatic | 0.000 | 1 |
| 10 | 11,670,740  | C | A | USP6NL          | 3 | intronic                    | 249  | 6  | 2.35  | 368  | 252  | 40.65 | 40.65 | Somatic | 0.000 | 251 | 187 | 42.69 | 42.69 | Somatic | 0.000 | 1 |
| 10 | 12,214,774  | C | T | SEC61A2         | 3 | intronic                    | 525  | 17 | 3.14  | 311  | 281  | 47.47 | 47.47 | Somatic | 0.000 | 316 | 290 | 47.85 | 47.85 | Somatic | 0.000 | 1 |
| 10 | 14,654,478  | A | C | FAM107B         | 3 | intronic                    | 473  | 9  | 1.87  | 1121 | 869  | 43.67 | 43.67 | Somatic | 0.000 | 386 | 324 | 45.63 | 45.63 | Somatic | 0.000 | 1 |
| 10 | 19,373,250  | T | G | LOC100130846    | 3 | 5_prime_flanking_region     | 326  | 15 | 4.40  | 265  | 217  | 45.02 | 45.02 | Somatic | 0.000 | 268 | 237 | 46.93 | 46.93 | Somatic | 0.000 | 1 |
| 10 | 21,300,024  | C | A | NEBL            | 2 | intronic                    | 186  | 6  | 3.13  | 564  | 454  | 44.60 | 44.60 | Somatic | 0.000 | 289 | 243 | 45.68 | 45.68 | Somatic | 0.000 | 1 |
| 10 | 34,032,764  | G | A |                 | 0 | 3                           | 658  | 18 | 2.66  | 727  | 617  | 45.91 | 45.91 | Somatic | 0.000 | 447 | 412 | 47.96 | 47.96 | Somatic | 0.000 | 1 |
| 10 | 45,273,565  | G | A | MARCH8          | 3 | 3_prime_untranslated_region | 558  | 3  | 0.53  | 706  | 9    | 1.26  | 1.26  | Somatic | 0.323 | 500 | 118 | 19.09 | 19.09 | Somatic | 0.000 | 2 |
| 10 | 46,461,650  | G | A | PPYR1           | 2 | 5_prime_flanking_region     | 443  | 4  | 0.89  | 1284 | 13   | 1.00  | 1.00  | Somatic | 0.536 | 902 | 61  | 6.33  | 6.33  | Somatic | 0.000 | 0 |
| 10 | 48,121,263  | G | A | ENSG00000221361 | 3 | 5_prime_flanking_region     | 717  | 32 | 4.27  | 307  | 215  | 41.19 | 41.19 | Somatic | 0.000 | 305 | 299 | 49.50 | 49.50 | Somatic | 0.000 | 1 |
| 10 | 58,815,611  | G | A |                 | 0 | 3                           | 243  | 3  | 1.22  | 371  | 289  | 43.79 | 43.79 | Somatic | 0.000 | 323 | 289 | 47.22 | 47.22 | Somatic | 0.000 | 1 |
| 10 | 59,817,876  | G | C | TFAM            | 3 | intronic                    | 198  | 0  | 0.00  | 316  | 8    | 2.47  | 2.47  | Somatic | 0.021 | 404 | 94  | 18.88 | 18.88 | Somatic | 0.000 | 2 |
| 10 | 65,639,660  | C | T | LOC100129267    | 3 | 5_prime_flanking_region     | 509  | 22 | 4.14  | 665  | 596  | 47.26 | 47.26 | Somatic | 0.000 | 453 | 399 | 46.83 | 46.83 | Somatic | 0.000 | 1 |
| 10 | 82,288,101  | G | A | SH2D4B          | 1 |                             |      |    |       |      |      |       |       |         |       |     |     |       |       |         |       |   |

|    |             |   |   |                  |   |                         |      |      |       |      |      |       |       |         |         |       |      |       |       |         |         |       |   |
|----|-------------|---|---|------------------|---|-------------------------|------|------|-------|------|------|-------|-------|---------|---------|-------|------|-------|-------|---------|---------|-------|---|
| 11 | 30,881,639  | A | G | DCDC5            | 1 | silent                  | 400  | 9    | 2.20  | 643  | 545  | 45.88 | 45.88 | Somatic | 0.000   | 357   | 320  | 47.27 | 47.27 | Somatic | 0.000   | 1     |   |
| 11 | 65,523,582  | C | G | E1F1AD           | 3 | intronic                | 2168 | 28   | 2.34  | 273  | 230  | 45.73 | 45.73 | Somatic | 0.000   | 371   | 376  | 50.33 | 50.33 | Somatic | 0.000   | 1     |   |
| 11 | 70,869,608  | G | A | NADSVN1          | 3 | intronic                | 105  | 12   | 5.53  | 104  | 114  | 52.29 | 52.29 | Somatic | 0.000   | 278   | 239  | 46.23 | 46.23 | Somatic | 0.000   | 1     |   |
| 11 | 88,164,936  | A | T | GRM5             | 3 | intronic                | 334  | 11   | 3.19  | 412  | 363  | 46.84 | 46.84 | Somatic | 0.000   | 246   | 235  | 48.86 | 48.86 | Somatic | 0.000   | 1     |   |
| 11 | 96,540,220  | G | A |                  | 0 | 3                       | 0    | 750  | 0     | 0.00 | 1293 | 25    | 1.90  | 1.90    | Somatic | 0.000 | 567  | 133   | 19.00 | 19.00   | Somatic | 0.000 | 2 |
| 11 | 118,994,585 | G | T | ENSG000001199217 | 3 | 5_prime_flanking_region | 464  | 6    | 1.28  | 107  | 70   | 39.55 | 39.55 | Somatic | 0.000   | 316   | 287  | 47.60 | 47.60 | Somatic | 0.000   | 1     |   |
| 11 | 124,600,145 | C | T | PKNOX2           | 2 | intronic                | 1980 | 71   | 3.46  | 380  | 334  | 46.78 | 46.78 | Somatic | 0.000   | 287   | 259  | 47.44 | 47.44 | Somatic | 0.000   | 1     |   |
| 12 | 7,610,680   | C | T | LOC100134191     | 2 | 3_prime_flanking_region | 941  | 26   | 2.69  | 706  | 562  | 44.32 | 44.32 | Somatic | 0.000   | 246   | 253  | 50.70 | 50.70 | Somatic | 0.000   | 1     |   |
| 12 | 10,740,491  | A | G | STYK1            | 3 | 5_prime_flanking_region | 947  | 35   | 3.56  | 610  | 477  | 43.88 | 43.88 | Somatic | 0.000   | 315   | 367  | 53.81 | 53.81 | Somatic | 0.000   | 1     |   |
| 12 | 40,159,842  | G | C | PDZRN4           | 3 | intronic                | 864  | 29   | 3.25  | 491  | 446  | 47.60 | 47.60 | Somatic | 0.000   | 386   | 359  | 48.19 | 48.19 | Somatic | 0.000   | 1     |   |
| 12 | 56,424,837  | C | T | TSPAN31          | 2 | 5_prime_flanking_region | 320  | 14   | 4.19  | 105  | 102  | 49.28 | 49.28 | Somatic | 0.000   | 208   | 170  | 44.97 | 44.97 | Somatic | 0.000   | 1     |   |
| 12 | 71,706,640  | T | C |                  | 0 | 3                       | 0    | 395  | 16    | 3.89 | 663  | 563   | 45.92 | 45.92   | Somatic | 0.000 | 365  | 314   | 46.24 | 46.24   | Somatic | 0.000 | 1 |
| 12 | 71,787,601  | T | A |                  | 0 | 3                       | 0    | 804  | 5     | 0.62 | 1106 | 27    | 2.38  | 2.38    | Somatic | 0.001 | 646  | 186   | 22.36 | 22.36   | Somatic | 0.000 | 2 |
| 12 | 76,730,664  | C | G | NAV3             | 3 | 5_prime_flanking_region | 277  | 10   | 3.48  | 334  | 300  | 47.32 | 47.32 | Somatic | 0.000   | 339   | 307  | 47.52 | 47.52 | Somatic | 0.000   | 1     |   |
| 12 | 97,164,212  | C | A |                  | 0 | 3                       | 0    | 780  | 8     | 1.02 | 861  | 863   | 50.06 | 50.06   | Somatic | 0.000 | 436  | 448   | 50.68 | 50.68   | Somatic | 0.000 | 1 |
| 12 | 99,688,821  | T | C | ANO4             | 2 | 5_prime_flanking_region | 210  | 8    | 3.67  | 353  | 367  | 50.97 | 50.97 | Somatic | 0.000   | 265   | 224  | 45.81 | 45.81 | Somatic | 0.000   | 1     |   |
| 12 | 105,956,296 | G | A | CRY1             | 2 | intronic                | 1387 | 65   | 4.48  | 797  | 748  | 48.41 | 48.41 | Somatic | 0.000   | 472   | 450  | 48.81 | 48.81 | Somatic | 0.000   | 1     |   |
| 12 | 106,519,449 | C | T | BTBD11           | 3 | intronic                | 485  | 16   | 3.19  | 363  | 348  | 48.95 | 48.95 | Somatic | 0.000   | 276   | 281  | 50.45 | 50.45 | Somatic | 0.000   | 1     |   |
| 12 | 113,287,422 | C | T | TBX5             | 3 | intronic                | 409  | 2    | 0.49  | 284  | 195  | 40.71 | 40.71 | Somatic | 0.000   | 249   | 204  | 45.03 | 45.03 | Somatic | 0.000   | 1     |   |
| 12 | 117,961,498 | C | A | KIAA1853         | 2 | intronic                | 2340 | 75   | 3.11  | 744  | 609  | 45.01 | 45.01 | Somatic | 0.000   | 327   | 321  | 49.54 | 49.54 | Somatic | 0.000   | 1     |   |
| 12 | 128,573,952 | C | T | TMEM132D         | 2 | intronic                | 426  | 13   | 2.96  | 343  | 313  | 47.71 | 47.71 | Somatic | 0.000   | 394   | 355  | 47.40 | 47.40 | Somatic | 0.000   | 1     |   |
| 13 | 30,843,489  | T | G | B3GALT1          | 3 | 3_prime_flanking_region | 441  | 20   | 4.34  | 568  | 35   | 5.80  | 5.80  | Somatic | 0.760   | 651   | 1079 | 14.34 | 14.34 | Somatic | 0.000   | 0     |   |
| 13 | 33,827,688  | G | A |                  | 0 | 3                       | 0    | 1310 | 74    | 5.35 | 593  | 534   | 47.38 | 47.38   | Somatic | 0.000 | 317  | 264   | 45.44 | 45.44   | Somatic | 0.000 | 1 |
| 13 | 35,857,458  | T | G | SPG20            | 3 | 5_prime_flanking_region | 265  | 8    | 2.93  | 237  | 261  | 52.41 | 52.41 | Somatic | 0.000   | 269   | 241  | 47.25 | 47.25 | Somatic | 0.000   | 1     |   |
| 13 | 37,251,407  | C | A | TRPC4            | 3 | intronic                | 496  | 10   | 1.98  | 725  | 616  | 45.94 | 45.94 | Somatic | 0.000   | 351   | 286  | 44.90 | 44.90 | Somatic | 0.000   | 1     |   |
| 13 | 54,761,858  | G | A |                  | 0 | 2                       | 0    | 530  | 10    | 1.85 | 1050 | 899   | 46.13 | 46.13   | Somatic | 0.000 | 380  | 385   | 50.33 | 50.33   | Somatic | 0.000 | 1 |
| 13 | 55,648,661  | C | T | ENSG00000219006  | 3 | 5_prime_flanking_region | 316  | 6    | 1.86  | 706  | 563  | 44.37 | 44.37 | Somatic | 0.000   | 418   | 375  | 47.29 | 47.29 | Somatic | 0.000   | 1     |   |
| 13 | 57,494,427  | G | C | ENSG00000202422  | 3 | 3_prime_flanking_region | 305  | 0    | 0.00  | 823  | 15   | 1.79  | 1.79  | Somatic | 0.009   | 556   | 146  | 20.80 | 20.80 | Somatic | 0.000   | 2     |   |
| 13 | 59,327,359  | C | T | DIAPH3           | 3 | intronic                | 361  | 24   | 6.23  | 424  | 367  | 46.40 | 46.40 | Somatic | 0.000   | 374   | 309  | 45.24 | 45.24 | Somatic | 0.000   | 1     |   |
| 13 | 60,197,987  | T | A |                  | 0 | 3                       | 0    | 499  | 24    | 4.59 | 433  | 431   | 49.88 | 49.88   | Somatic | 0.000 | 354  | 329   | 48.17 | 48.17   | Somatic | 0.000 | 1 |
| 13 | 60,264,538  | A | G | ENSG00000206854  | 3 | 3_prime_flanking_region | 371  | 11   | 2.88  | 773  | 733  | 48.67 | 48.67 | Somatic | 0.000   | 305   | 275  | 47.41 | 47.41 | Somatic | 0.000   | 1     |   |
| 13 | 84,248,715  | G | A |                  | 0 | 3                       | 0    | 304  | 35    | 5.48 | 667  | 538   | 44.65 | 44.65   | Somatic | 0.000 | 332  | 294   | 46.96 | 46.96   | Somatic | 0.000 | 1 |
| 13 | 103,366,966 | C | A |                  | 0 | 3                       | 0    | 152  | 8     | 5.00 | 155  | 143   | 47.99 | 47.99   | Somatic | 0.000 | 157  | 150   | 48.86 | 48.86   | Somatic | 0.000 | 1 |
| 13 | 105,042,162 | A | G |                  | 0 | 2                       | 0    | 161  | 1     | 0.62 | 196  | 160   | 44.94 | 44.94   | Somatic | 0.000 | 214  | 219   | 50.58 | 50.58   | Somatic | 0.000 | 1 |
| 13 | 105,714,967 | G | T |                  | 0 | 3                       | 0    | 496  | 8     | 1.59 | 486  | 437   | 47.35 | 47.35   | Somatic | 0.000 | 396  | 348   | 46.77 | 46.77   | Somatic | 0.000 | 1 |
| 13 | 107,212,497 | G | T | FAM155A          | 3 | intronic                | 518  | 1    | 0.19  | 667  | 19   | 2.77  | 2.77  | Somatic | 0.000   | 532   | 133  | 20.00 | 20.00 | Somatic | 0.000   | 2     |   |
| 13 | 108,489,194 | G | T | MYO16            | 3 | intronic                | 221  | 8    | 3.49  | 147  | 146  | 49.83 | 49.83 | Somatic | 0.000   | 118   | 130  | 52.42 | 52.42 | Somatic | 0.000   | 1     |   |
| 14 | 25,375,341  | T | G | ENSG00000212270  | 2 | 5_prime_flanking_region | 614  | 24   | 3.76  | 1044 | 112  | 9.69  | 9.69  | Somatic | 0.023   | 418   | 186  | 30.79 | 30.79 | Somatic | 0.000   | 0     |   |
| 14 | 27,583,816  | G | A |                  | 0 | 3                       | 0    | 92   | 0     | 0.00 | 203  | 133   | 39.58 | 39.58   | Somatic | 0.000 | 130  | 80    | 38.10 | 38.10   | Somatic | 0.000 | 0 |
| 14 | 27,583,817  | C | A |                  | 0 | 3                       | 0    | 90   | 0     | 0.00 | 204  | 133   | 39.47 | 39.47   | Somatic | 0.000 | 131  | 80    | 37.91 | 37.91   | Somatic | 0.000 | 0 |
| 14 | 31,875,476  | C | G | AKAP6            | 3 | intronic                | 748  | 21   | 2.73  | 924  | 777  | 45.68 | 45.68 | Somatic | 0.000   | 469   | 437  | 48.23 | 48.23 | Somatic | 0.000   | 1     |   |
| 14 | 32,863,416  | T | C | NPAS3            | 2 | intronic                | 547  | 16   | 2.84  | 671  | 616  | 47.86 | 47.86 | Somatic | 0.000   | 348   | 318  | 47.75 | 47.75 | Somatic | 0.000   | 1     |   |
| 14 | 42,520,196  | A | T |                  | 0 | 3                       | 0    | 240  | 12    | 4.76 | 233  | 194   | 45.43 | 45.43   | Somatic | 0.000 | 232  | 212   | 47.75 | 47.75   | Somatic | 0.000 | 1 |
| 14 | 43,259,343  | C | A |                  | 0 | 3                       | 0    | 298  | 10    | 3.25 | 331  | 242   | 42.23 | 42.23   | Somatic | 0.000 | 261  | 252   | 49.12 | 49.12   | Somatic | 0.000 | 1 |
| 14 | 43,940,576  | A | T | LOC729165        | 3 | 3_prime_flanking_region | 96   | 5    | 4.95  | 103  | 70   | 40.46 | 40.46 | Somatic | 0.000   | 173   | 124  | 41.75 | 41.75 | Somatic | 0.000   | 1     |   |
| 14 | 45,179,799  | G | A |                  | 0 | 2                       | 0    | 497  | 11    | 2.17 | 490  | 362   | 42.49 | 42.49   | Somatic | 0.000 | 295  | 257   | 46.56 | 46.56   | Somatic | 0.000 | 1 |
| 14 | 47,634,587  | C | G |                  | 0 | 2                       | 0    | 992  | 32    | 3.13 | 1125 | 899   | 44.42 | 44.42   | Somatic | 0.000 | 379  | 389   | 50.65 | 50.65   | Somatic | 0.000 | 1 |
| 14 | 49,219,295  | A | T | POLE2            | 3 | intronic                | 102  | 1    | 0.97  | 85   | 88   | 50.87 | 50.87 | Somatic | 0.000   | 179   | 187  | 51.09 | 51.09 | Somatic | 0.000   | 1     |   |
| 14 | 69,096,682  | A | C | LOC100130174     | 2 | 3_prime_flanking_region | 443  | 85   | 16.10 | 311  | 117  | 27.34 | 27.34 | Somatic | 0.000   | 314   | 215  | 40.64 | 40.64 | Somatic | 0.000   | 0     |   |
| 14 | 69,239,804  | G | A | KIAA0247         | 3 | intronic                | 567  | 37   | 6.13  | 402  | 325  | 44.70 | 44.70 | Somatic | 0.000   | 352   | 273  | 43.68 | 43.68 | Somatic | 0.000   | 1     |   |
| 14 | 75,418,958  | G | A | TTL5             | 1 | missense                | 303  | 9    | 2.88  | 258  | 256  | 49.81 | 49.81 | Somatic | 0.000   | 289   | 261  | 47.45 | 47.45 | Somatic | 0.000   | 1     |   |
| 14 | 80,669,474  | G | A | TSHR             | 2 | intronic                | 542  | 28   | 4.91  | 408  | 330  | 44.72 | 44.72 | Somatic | 0.000   | 375   | 313  | 45.49 | 45.49 | Somatic | 0.000   | 1     |   |
| 14 | 86,938,324  | C | T |                  | 0 | 3                       | 0    | 255  | 0     | 0.00 | 583  | 20    | 3.32  | 3.32    | Somatic | 0.001 | 432  | 121   | 21.88 | 21.88   | Somatic | 0.000 | 2 |
| 14 | 91,505,353  | G | A | FBLN5            | 2 | 5_prime_flanking_region | 449  | 25   | 6.68  | 561  | 56   | 9.08  | 9.08  | Somatic | 0.544   | 409   | 136  | 24.95 | 24.95 | Somatic | 0.000   | 0     |   |
| 14 | 95,369,238  | C | T | LOC730125        | 3 | 5_prime_flanking_region | 393  | 7    | 1.40  | 626  | 522  | 45.47 | 45.47 | Somatic | 0.000   | 407   | 358  | 46.80 | 46.80 | Somatic | 0.000   | 1     |   |
| 14 | 98,438,420  | A | T |                  | 0 | 3                       | 0    | 1424 | 59    | 3.98 | 491  | 450   | 47.82 | 47.82   | Somatic | 0.000 | 361  | 363   | 50.14 | 50.14   | Somatic | 0.000 | 1 |
| 14 | 100,771,639 | C | G |                  | 0 | 2                       | 0    | 242  | 3     | 1.22 | 60   | 57    | 48.72 | 48.72   | Somatic | 0.000 | 110  | 111   | 50.23 | 50.23   | Somatic | 0.000 | 1 |
| 14 | 103,846,656 | T | A | LOC100131034     | 2 | 3_prime_flanking_region | 180  | 1    | 0.55  | 68   | 67   | 49.63 | 49.63 | Somatic | 0.000   | 340   | 297  | 46.62 | 46.62 | Somatic | 0.000   | 1     |   |
| 15 | 18,435,184  | C | T | VSI67            | 3 | 5_prime_flanking_region | 289  | 16   | 5.25  | 217  | 114  | 34.44 | 34.44 | Somatic | 0.000   | 284   | 224  | 44.09 | 44.09 | Somatic | 0.000   | 0     |   |
| 15 | 25,956,026  | G | A | OCA2             | 3 | intronic                | 982  | 27   | 2.68  | 338  | 279  | 45.22 | 45.22 | Somatic | 0.000   | 349   | 375  | 51.80 | 51.80 | Somatic | 0.000   | 1     |   |
| 15 | 27,762,153  | G | A | ENSG00000212769  | 3 | 5_prime_flanking_region | 123  | 4    | 3.15  | 71   | 69   | 49.29 | 49.29 | Somatic | 0.000   | 243   | 227  | 48.30 | 48.30 | Somatic | 0.000   | 1     |   |
| 15 | 31,122,283  | A | T | FMN1             | 3 | intronic                | 91   | 3    | 3.19  | 104  | 9    | 7.96  | 7.96  | Somatic | 0.026   | 256   | 38   | 12.93 | 12.93 | Somatic | 0.001   | 0     |   |
| 15 | 35,751,548  | T | C |                  | 0 | 2                       | 0    | 607  | 9     | 1.46 | 639  | 543   | 45.94 | 45.94   | Somatic | 0.000 | 388  | 360   | 48.13 | 48.13   | Somatic | 0.000 | 1 |
| 15 | 35,928,644  | G | A |                  | 0 | 3                       | 0    | 830  | 18    | 2.12 | 1006 | 914   | 47.60 | 47.60</ |         |       |      |       |       |         |         |       |   |

|    |            |   |   |                 |   |                         |      |      |       |      |      |       |       |         |         |       |     |       |       |         |         |       |   |
|----|------------|---|---|-----------------|---|-------------------------|------|------|-------|------|------|-------|-------|---------|---------|-------|-----|-------|-------|---------|---------|-------|---|
| 16 | 26,024,776 | G | A | HS3T4           | 3 | intronic                | 942  | 20   | 2.08  | 567  | 538  | 48.69 | 48.69 | Somatic | 0.000   | 331   | 291 | 46.78 | 46.78 | Somatic | 0.000   | 1     |   |
| 16 | 26,732,330 | G | T |                 | 0 | 2                       | 0    | 2087 | 1     | 0.05 | 3254 | 72    | 2.16  | 2.16    | Somatic | 0.000 | 773 | 225   | 22.55 | 22.55   | Somatic | 0.000 | 2 |
| 16 | 50,030,298 | C | T |                 | 0 | 3                       | 0    | 509  | 19    | 3.60 | 423  | 331   | 43.90 | 43.90   | Somatic | 0.000 | 388 | 333   | 46.19 | 46.19   | Somatic | 0.000 | 1 |
| 16 | 50,680,429 | C | T | LOC388276       | 3 | 5_prime_flanking_region | 368  | 15   | 3.92  | 295  | 298  | 50.25 | 50.25 | Somatic | 0.000   | 284   | 251 | 46.92 | 46.92 | Somatic | 0.000   | 1     |   |
| 16 | 51,518,521 | T | A | LOC390730       | 3 | 5_prime_flanking_region | 416  | 11   | 2.58  | 223  | 190  | 46.00 | 46.00 | Somatic | 0.000   | 232   | 184 | 44.23 | 44.23 | Somatic | 0.000   | 1     |   |
| 16 | 57,441,427 | T | G |                 | 0 | 3                       | 0    | 251  | 17    | 6.34 | 218  | 31    | 12.45 | 12.45   | Somatic | 0.005 | 341 | 135   | 28.36 | 28.36   | Somatic | 0.000 | 0 |
| 16 | 57,599,867 | C | T |                 | 0 | 3                       | 0    | 281  | 4     | 1.40 | 247  | 215   | 46.54 | 46.54   | Somatic | 0.000 | 282 | 247   | 46.69 | 46.69   | Somatic | 0.000 | 1 |
| 16 | 59,855,653 | G | C |                 | 0 | 3                       | 0    | 455  | 0     | 0.00 | 927  | 27    | 2.83  | 2.83    | Somatic | 0.000 | 454 | 130   | 22.26 | 22.26   | Somatic | 0.000 | 2 |
| 16 | 63,589,987 | C | T | CDH11           | 1 | missense                | 1112 | 39   | 3.39  | 806  | 689  | 46.09 | 46.09 | Somatic | 0.000   | 364   | 333 | 47.78 | 47.78 | Somatic | 0.000   | 1     |   |
| 16 | 74,512,157 | C | T |                 | 0 | 2                       | 0    | 434  | 7     | 1.59 | 366  | 318   | 46.49 | 46.49   | Somatic | 0.000 | 337 | 325   | 49.09 | 49.09   | Somatic | 0.000 | 1 |
| 16 | 77,161,670 | G | A | WVVOX           | 3 | intronic                | 810  | 3    | 1.84  | 156  | 115  | 42.44 | 42.44 | Somatic | 0.000   | 201   | 177 | 46.83 | 46.83 | Somatic | 0.000   | 1     |   |
| 16 | 77,367,408 | G | A | WVVOX           | 3 | intronic                | 811  | 40   | 4.70  | 637  | 514  | 44.66 | 44.66 | Somatic | 0.000   | 404   | 347 | 46.21 | 46.21 | Somatic | 0.000   | 1     |   |
| 16 | 78,207,037 | C | A | MAF             | 3 | 5_prime_flanking_region | 996  | 36   | 3.49  | 546  | 483  | 46.94 | 46.94 | Somatic | 0.000   | 405   | 425 | 51.20 | 51.20 | Somatic | 0.000   | 1     |   |
| 16 | 81,204,189 | C | T | CDH13           | 2 | 5_prime_flanking_region | 855  | 36   | 4.04  | 593  | 510  | 46.24 | 46.24 | Somatic | 0.000   | 425   | 399 | 48.42 | 48.42 | Somatic | 0.000   | 1     |   |
| 16 | 81,731,917 | C | T | CDH13           | 3 | intronic                | 1040 | 2    | 0.19  | 1218 | 23   | 1.85  | 1.85  | Somatic | 0.000   | 519   | 136 | 20.76 | 20.76 | Somatic | 0.000   | 2     |   |
| 16 | 82,624,963 | C | T | SLC38A8         | 3 | intronic                | 1027 | 24   | 2.28  | 170  | 160  | 48.48 | 48.48 | Somatic | 0.000   | 344   | 327 | 48.73 | 48.73 | Somatic | 0.000   | 1     |   |
| 17 | 4,480,344  | C | T | ENSG00000222429 | 3 | 5_prime_flanking_region | 376  | 21   | 5.29  | 114  | 99   | 46.48 | 46.48 | Somatic | 0.000   | 255   | 234 | 47.85 | 47.85 | Somatic | 0.000   | 1     |   |
| 17 | 5,288,451  | T | G | DHX33           | 1 | missense                | 604  | 18   | 2.89  | 187  | 158  | 45.80 | 45.80 | Somatic | 0.000   | 254   | 193 | 43.18 | 43.18 | Somatic | 0.000   | 1     |   |
| 17 | 7,533,418  | A | G | WRAP53          | 2 | intronic                | 519  | 24   | 4.42  | 125  | 91   | 42.13 | 42.13 | Somatic | 0.000   | 248   | 201 | 44.77 | 44.77 | Somatic | 0.000   | 1     |   |
| 17 | 7,696,343  | T | G | JMJ3D           | 1 | missense                | 114  | 6    | 5.00  | 70   | 6    | 7.89  | 7.89  | Somatic | 0.135   | 289   | 96  | 24.94 | 24.94 | Somatic | 0.005   | 0     |   |
| 17 | 21,950,614 | C | T | ENSG00000209244 | 2 | 5_prime_flanking_region | 85   | 3    | 3.41  | 44   | 42   | 48.84 | 48.84 | Somatic | 0.000   | 73    | 62  | 45.93 | 45.93 | Somatic | 0.000   | 1     |   |
| 17 | 24,186,705 | T | C | C17orf63        | 3 | intronic                | 406  | 15   | 3.56  | 136  | 144  | 51.43 | 51.43 | Somatic | 0.000   | 329   | 289 | 46.76 | 46.76 | Somatic | 0.000   | 1     |   |
| 17 | 25,735,564 | A | C | CPD             | 3 | intronic                | 1078 | 21   | 16.28 | 234  | 96   | 29.09 | 29.09 | Somatic | 0.025   | 211   | 228 | 51.94 | 51.94 | Somatic | 0.000   | 0     |   |
| 17 | 26,580,889 | G | C | NF1             | 3 | intronic                | 477  | 10   | 2.05  | 540  | 458  | 45.89 | 45.89 | Somatic | 0.000   | 233   | 238 | 50.53 | 50.53 | Somatic | 0.000   | 1     |   |
| 17 | 28,127,819 | C | T | MYO1D           | 3 | intronic                | 324  | 17   | 4.99  | 243  | 180  | 42.55 | 42.55 | Somatic | 0.000   | 277   | 221 | 44.38 | 44.38 | Somatic | 0.000   | 1     |   |
| 17 | 29,981,226 | C | T | TMEM132E        | 1 | silent                  | 1815 | 79   | 4.17  | 275  | 343  | 55.50 | 55.50 | Somatic | 0.000   | 289   | 248 | 46.18 | 46.18 | Somatic | 0.000   | 0     |   |
| 17 | 35,007,340 | T | C | STAR3D          | 2 | 5_prime_flanking_region | 681  | 29   | 4.08  | 97   | 80   | 45.20 | 45.20 | Somatic | 0.000   | 159   | 115 | 41.97 | 41.97 | Somatic | 0.000   | 1     |   |
| 17 | 36,096,311 | T | C | SMARCE1         | 2 | 5_prime_flanking_region | 128  | 1    | 0.78  | 196  | 174  | 47.03 | 47.03 | Somatic | 0.000   | 253   | 232 | 47.84 | 47.84 | Somatic | 0.000   | 1     |   |
| 17 | 48,968,272 | G | A | ENSG00000221534 | 3 | 5_prime_flanking_region | 329  | 2    | 0.60  | 384  | 241  | 38.56 | 38.56 | Somatic | 0.000   | 249   | 176 | 41.41 | 41.41 | Somatic | 0.000   | 1     |   |
| 17 | 49,442,081 | C | T |                 | 0 | 2                       | 0    | 576  | 20    | 3.36 | 394  | 342   | 46.47 | 46.47   | Somatic | 0.000 | 326 | 241   | 42.50 | 42.50   | Somatic | 0.000 | 1 |
| 17 | 50,661,710 | T | C | HLF             | 3 | 5_prime_flanking_region | 1225 | 58   | 4.52  | 647  | 485  | 42.84 | 42.84 | Somatic | 0.000   | 486   | 487 | 50.05 | 50.05 | Somatic | 0.000   | 1     |   |
| 17 | 59,597,932 | C | G | TEX2            | 3 | intronic                | 322  | 5    | 1.53  | 441  | 12   | 2.65  | 2.65  | Somatic | 0.195   | 380   | 64  | 14.41 | 14.41 | Somatic | 0.000   | 0     |   |
| 17 | 67,860,759 | A | C | ENSG00000211264 | 3 | 3_prime_flanking_region | 286  | 4    | 1.38  | 185  | 190  | 50.67 | 50.67 | Somatic | 0.000   | 291   | 232 | 44.36 | 44.36 | Somatic | 0.000   | 1     |   |
| 17 | 75,696,250 | G | A | GAA             | 1 | silent                  | 23   | 2    | 8.00  | 17   | 13   | 43.33 | 43.33 | Somatic | 0.016   | 85    | 63  | 42.57 | 42.57 | Somatic | 0.001   | 1     |   |
| 18 | 2,228,633  | C | T | LOC100131655    | 2 | intronic                | 1078 | 46   | 4.09  | 1107 | 952  | 46.24 | 46.24 | Somatic | 0.000   | 344   | 333 | 49.19 | 49.19 | Somatic | 0.000   | 1     |   |
| 18 | 5,155,122  | G | A | ENSG00000215368 | 3 | 5_prime_flanking_region | 957  | 30   | 3.04  | 597  | 492  | 45.18 | 45.18 | Somatic | 0.000   | 400   | 338 | 45.80 | 45.80 | Somatic | 0.000   | 1     |   |
| 18 | 11,368,929 | G | A |                 | 0 | 3                       | 0    | 359  | 17    | 4.52 | 443  | 408   | 47.94 | 47.94   | Somatic | 0.000 | 318 | 245   | 43.52 | 43.52   | Somatic | 0.000 | 1 |
| 18 | 18,624,758 | T | C |                 | 0 | 2                       | 0    | 1300 | 41    | 3.06 | 866  | 768   | 47.00 | 47.00   | Somatic | 0.000 | 440 | 402   | 47.74 | 47.74   | Somatic | 0.000 | 1 |
| 18 | 26,038,883 | G | A |                 | 0 | 3                       | 0    | 443  | 0     | 0.00 | 736  | 17    | 2.26  | 2.26    | Somatic | 0.000 | 524 | 146   | 21.79 | 21.79   | Somatic | 0.000 | 2 |
| 18 | 29,585,389 | T | G | ASXL3           | 3 | 3_prime_flanking_region | 162  | 6    | 3.57  | 120  | 116  | 49.15 | 49.15 | Somatic | 0.000   | 186   | 201 | 51.94 | 51.94 | Somatic | 0.000   | 1     |   |
| 18 | 29,798,038 | G | A | NOLA            | 3 | intronic                | 543  | 21   | 3.72  | 860  | 644  | 42.82 | 42.82 | Somatic | 0.000   | 441   | 337 | 43.32 | 43.32 | Somatic | 0.000   | 1     |   |
| 18 | 30,590,076 | A | G | DTNA            | 2 | intronic                | 432  | 14   | 3.14  | 407  | 314  | 43.55 | 43.55 | Somatic | 0.000   | 323   | 329 | 50.46 | 50.46 | Somatic | 0.000   | 1     |   |
| 18 | 36,013,083 | C | T |                 | 0 | 3                       | 0    | 303  | 11    | 3.50 | 426  | 307   | 41.88 | 41.88   | Somatic | 0.000 | 279 | 238   | 46.03 | 46.03   | Somatic | 0.000 | 1 |
| 18 | 36,630,355 | T | G |                 | 0 | 3                       | 0    | 175  | 9     | 4.89 | 207  | 186   | 47.33 | 47.33   | Somatic | 0.000 | 183 | 174   | 48.74 | 48.74   | Somatic | 0.000 | 1 |
| 18 | 46,165,704 | G | A | C18orf24        | 1 | silent                  | 327  | 12   | 3.54  | 298  | 242  | 44.81 | 44.81 | Somatic | 0.000   | 302   | 315 | 51.05 | 51.05 | Somatic | 0.000   | 1     |   |
| 18 | 47,449,416 | C | T |                 | 0 | 2                       | 0    | 431  | 6     | 1.37 | 496  | 445   | 47.29 | 47.29   | Somatic | 0.000 | 434 | 323   | 42.67 | 42.67   | Somatic | 0.000 | 1 |
| 18 | 51,514,701 | A | G |                 | 0 | 3                       | 0    | 540  | 20    | 3.57 | 391  | 381   | 49.35 | 49.35   | Somatic | 0.000 | 371 | 347   | 48.33 | 48.33   | Somatic | 0.000 | 1 |
| 18 | 52,121,185 | G | A |                 | 0 | 3                       | 0    | 393  | 12    | 2.96 | 392  | 396   | 50.25 | 50.25   | Somatic | 0.000 | 246 | 250   | 50.40 | 50.40   | Somatic | 0.000 | 1 |
| 18 | 52,654,678 | A | C | WDR7            | 3 | intronic                | 533  | 12   | 2.20  | 1205 | 115  | 8.71  | 8.71  | Somatic | 0.000   | 393   | 159 | 28.80 | 28.80 | Somatic | 0.000   | 0     |   |
| 18 | 62,821,154 | G | T |                 | 0 | 3                       | 0    | 283  | 11    | 3.74 | 477  | 424   | 47.06 | 47.06   | Somatic | 0.000 | 310 | 319   | 50.72 | 50.72   | Somatic | 0.000 | 1 |
| 18 | 63,165,104 | T | C |                 | 0 | 3                       | 0    | 412  | 1     | 0.24 | 1155 | 33    | 2.78  | 2.78    | Somatic | 0.000 | 688 | 185   | 21.19 | 21.19   | Somatic | 0.000 | 2 |
| 18 | 64,146,279 | G | T |                 | 0 | 3                       | 0    | 348  | 13    | 3.60 | 447  | 360   | 44.61 | 44.61   | Somatic | 0.000 | 314 | 257   | 45.01 | 45.01   | Somatic | 0.000 | 1 |
| 18 | 64,226,339 | T | G |                 | 0 | 3                       | 0    | 422  | 41    | 8.86 | 925  | 162   | 14.90 | 14.90   | Somatic | 0.798 | 394 | 216   | 35.41 | 35.41   | Somatic | 0.005 | 0 |
| 18 | 67,103,868 | C | T |                 | 0 | 3                       | 0    | 226  | 12    | 5.04 | 256  | 251   | 49.51 | 49.51   | Somatic | 0.000 | 262 | 232   | 46.96 | 46.96   | Somatic | 0.000 | 1 |
| 18 | 67,787,857 | G | A |                 | 0 | 3                       | 0    | 142  | 5     | 3.40 | 165  | 127   | 43.49 | 43.49   | Somatic | 0.000 | 194 | 173   | 47.14 | 47.14   | Somatic | 0.000 | 1 |
| 18 | 69,657,558 | A | G |                 | 0 | 3                       | 0    | 771  | 52    | 6.32 | 682  | 675   | 49.74 | 49.74   | Somatic | 0.000 | 372 | 324   | 46.55 | 46.55   | Somatic | 0.000 | 1 |
| 18 | 70,624,608 | A | G | ZNF407          | 2 | intronic                | 258  | 4    | 1.53  | 494  | 472  | 48.86 | 48.86 | Somatic | 0.000   | 327   | 311 | 48.75 | 48.75 | Somatic | 0.000   | 1     |   |
| 18 | 74,833,430 | C | T | SALL3           | 3 | 5_prime_flanking_region | 94   | 5    | 5.05  | 17   | 37   | 68.52 | 68.52 | Somatic | 0.000   | 242   | 215 | 47.05 | 47.05 | Somatic | 0.000   | 0     |   |
| 19 | 16,885,826 | C | T | CPAMD8          | 3 | intronic                | 524  | 11   | 2.06  | 146  | 150  | 50.68 | 50.68 | Somatic | 0.000   | 293   | 250 | 46.04 | 46.04 | Somatic | 0.000   | 1     |   |
| 19 | 18,513,222 | G | A | FKBP8           | 3 | intronic                | 396  | 23   | 5.49  | 88   | 72   | 45.00 | 45.00 | Somatic | 0.000   | 204   | 228 | 52.78 | 52.78 | Somatic | 0.000   | 1     |   |
| 19 | 19,045,292 | G | A | SLC25A42        | 3 | intronic                | 1127 | 38   | 3.26  | 119  | 94   | 44.13 | 44.13 | Somatic | 0.000   | 391   | 312 | 44.38 | 44.38 | Somatic | 0.000   | 1     |   |
| 19 | 20,320,043 | C | T | ZNF826          | 3 | 3_prime_flanking_region | 75   | 4    | 5.06  | 58   | 64   | 52.46 | 52.46 | Somatic | 0.000   | 86    | 73  | 45.91 | 45.91 | Somatic | 0.000   | 1     |   |
| 19 | 39,677,436 | C | T | WTP1            | 3 | intronic                | 270  | 10   | 3.57  | 147  | 107  | 42.13 | 42.13 | Somatic | 0.000   | 232   | 223 | 49.01 | 49.01 | Somatic | 0.000   | 1     |   |
| 19 | 48,741,326 | C | T | XRC1            | 3 | intronic                | 1207 | 60   | 4.74  | 248  | 178  | 41.78 | 41.78 | Somatic | 0.000   | 358   | 293 | 45.01 | 45.01 | Somatic |         |       |   |

|    |             |   |   |                 |   |                         |  |      |     |       |      |     |       |       |           |         |       |     |       |       |         |         |       |   |
|----|-------------|---|---|-----------------|---|-------------------------|--|------|-----|-------|------|-----|-------|-------|-----------|---------|-------|-----|-------|-------|---------|---------|-------|---|
| 21 | 26,646,726  | G | A |                 | 0 | 3                       |  | 0    | 215 | 0     | 0.00 | 385 | 9     | 2.28  | 2.28      | Somatic | 0.018 | 522 | 137   | 20.79 | 20.79   | Somatic | 0.000 | 2 |
| 21 | 30,459,290  | C | T | CLDN8           | 3 | 3_prime_flanking_region |  | 370  | 16  | 4.15  | 921  | 766 | 45.41 | 45.41 | Somatic   | 0.000   | 354   | 330 | 48.25 | 48.25 | Somatic | 0.000   | 1     |   |
| 21 | 41,416,902  | G | A | BACE2           | 3 | 5_prime_flanking_region |  | 1038 | 32  | 2.99  | 664  | 560 | 45.75 | 45.75 | Somatic   | 0.000   | 399   | 339 | 45.93 | 45.93 | Somatic | 0.000   | 1     |   |
| 21 | 42,402,818  | A | C | UMODL1          | 1 | missense                |  | 84   | 8   | 8.70  | 65   | 8   | 10.96 | 10.96 | Somatic   | 0.577   | 161   | 75  | 31.78 | 31.78 | Somatic | 0.000   | 0     |   |
| 21 | 43,397,525  | G | A | U2AF1           | 1 | missense                |  | 404  | 30  | 6.91  | 91   | 83  | 47.70 | 47.70 | Somatic   | 0.000   | 343   | 317 | 48.03 | 48.03 | Somatic | 0.000   | 1     |   |
| 21 | 46,252,211  | C | T | COL6A1          | 2 | 3_prime_flanking_region |  | 92   | 1   | 1.08  | 89   | 67  | 42.95 | 42.95 | Somatic   | 0.000   | 213   | 170 | 44.39 | 44.39 | Somatic | 0.000   | 1     |   |
| 21 | 46,301,845  | G | T | COL6A2          | 2 | 5_prime_flanking_region |  | 46   | 0   | 0.00  | 11   | 2   | 15.38 | 15.38 | Reference | 0.041   | 251   | 182 | 42.03 | 42.03 | Somatic | 0.000   | 0     |   |
| 22 | 18,187,764  | C | T | GNB1L           | 3 | intronic                |  | 387  | 7   | 1.78  | 104  | 92  | 46.94 | 46.94 | Somatic   | 0.000   | 223   | 211 | 48.62 | 48.62 | Somatic | 0.000   | 1     |   |
| 22 | 19,294,334  | C | G | ENSG00000220150 | 3 | 5_prime_flanking_region |  | 265  | 25  | 8.62  | 128  | 119 | 48.18 | 48.18 | Somatic   | 0.000   | 360   | 298 | 45.29 | 45.29 | Somatic | 0.000   | 1     |   |
| 22 | 20,866,781  | G | A | IGLV11-55       | 3 | 5_prime_flanking_region |  | 328  | 21  | 6.02  | 185  | 239 | 56.37 | 56.37 | Somatic   | 0.000   | 165   | 156 | 48.60 | 48.60 | Somatic | 0.000   | 0     |   |
| 22 | 36,194,879  | A | C | ELFN2           | 3 | 5_prime_flanking_region |  | 735  | 74  | 9.15  | 291  | 56  | 16.14 | 16.14 | Somatic   | 0.000   | 502   | 195 | 27.98 | 27.98 | Somatic | 0.000   | 0     |   |
| 22 | 38,089,713  | C | T | SYNGR1          | 3 | intronic                |  | 954  | 46  | 4.60  | 97   | 89  | 47.85 | 47.85 | Somatic   | 0.000   | 145   | 139 | 48.94 | 48.94 | Somatic | 0.000   | 1     |   |
| 22 | 46,395,195  | C | T | FLJ46257        | 3 | 3_prime_flanking_region |  | 378  | 10  | 2.58  | 137  | 111 | 44.76 | 44.76 | Somatic   | 0.000   | 302   | 308 | 50.49 | 50.49 | Somatic | 0.000   | 1     |   |
| 22 | 46,512,620  | A | G |                 | 0 | 3                       |  | 471  | 11  | 2.28  | 526  | 17  | 3.13  | 3.13  | Somatic   | 0.421   | 431   | 115 | 21.06 | 21.06 | Somatic | 0.000   | 2     |   |
| X  | 3,387,861   | G | A |                 | 0 | 3                       |  | 375  | 0   | 0.00  | 362  | 21  | 5.48  | 2.74  | Somatic   | 0.000   | 167   | 112 | 40.14 | 20.07 | Somatic | 0.000   | 2     |   |
| X  | 29,779,410  | G | A | IL1RAPL1        | 2 | intronic                |  | 121  | 6   | 4.72  | 21   | 384 | 94.81 | 47.41 | Somatic   | 0.000   | 19    | 292 | 93.89 | 46.95 | Somatic | 0.000   | 1     |   |
| X  | 32,777,396  | C | T | DMD             | 3 | intronic                |  | 414  | 38  | 8.41  | 31   | 496 | 94.12 | 47.06 | Somatic   | 0.000   | 21    | 292 | 93.29 | 46.65 | Somatic | 0.000   | 1     |   |
| X  | 34,705,765  | A | G |                 | 0 | 3                       |  | 217  | 29  | 11.79 | 7    | 287 | 97.62 | 48.81 | Somatic   | 0.000   | 12    | 311 | 96.28 | 48.14 | Somatic | 0.000   | 1     |   |
| X  | 39,157,340  | A | G |                 | 0 | 3                       |  | 283  | 22  | 7.21  | 22   | 391 | 94.67 | 47.34 | Somatic   | 0.000   | 22    | 413 | 94.94 | 47.47 | Somatic | 0.000   | 1     |   |
| X  | 52,897,186  | C | T | FAM156B         | 3 | 5_prime_flanking_region |  | 226  | 11  | 4.64  | 18   | 368 | 95.34 | 47.67 | Somatic   | 0.000   | 14    | 282 | 95.27 | 47.64 | Somatic | 0.000   | 1     |   |
| X  | 104,353,541 | G | C | IL1RAPL2        | 3 | intronic                |  | 141  | 21  | 12.96 | 24   | 327 | 93.16 | 46.58 | Somatic   | 0.000   | 19    | 424 | 95.71 | 47.86 | Somatic | 0.000   | 1     |   |
| X  | 111,088,560 | G | A | TRPC5           | 3 | intronic                |  | 253  | 11  | 4.17  | 39   | 584 | 93.74 | 46.87 | Somatic   | 0.000   | 15    | 321 | 95.54 | 47.77 | Somatic | 0.000   | 1     |   |
| X  | 116,699,743 | C | A |                 | 0 | 3                       |  | 219  | 25  | 10.25 | 34   | 461 | 93.13 | 46.57 | Somatic   | 0.000   | 11    | 396 | 97.30 | 48.65 | Somatic | 0.000   | 1     |   |
| X  | 118,033,017 | G | A | LONRF3          | 3 | intronic                |  | 473  | 37  | 7.25  | 18   | 437 | 96.04 | 48.02 | Somatic   | 0.000   | 16    | 351 | 95.64 | 47.82 | Somatic | 0.000   | 1     |   |
| X  | 132,324,635 | C | T | GPC4            | 3 | intronic                |  | 642  | 64  | 9.07  | 61   | 841 | 93.24 | 46.62 | Somatic   | 0.000   | 21    | 412 | 95.15 | 47.58 | Somatic | 0.000   | 1     |   |
| X  | 142,016,065 | C | T | ENSG00000202473 | 3 | 3_prime_flanking_region |  | 59   | 6   | 9.23  | 10   | 139 | 93.29 | 46.64 | Somatic   | 0.000   | 8     | 164 | 95.35 | 47.67 | Somatic | 0.000   | 1     |   |
| X  | 151,265,229 | C | T | GABRA3          | 3 | intronic                |  | 621  | 28  | 4.31  | 50   | 711 | 93.43 | 46.71 | Somatic   | 0.000   | 14    | 376 | 96.41 | 48.21 | Somatic | 0.000   | 1     |   |
| Y  | 9,231,939   | G | A | TTTY20          | 2 | intronic                |  | 115  | 8   | 6.50  | 6    | 96  | 94.12 | 47.06 | Somatic   | 0.000   | 17    | 226 | 93.00 | 46.50 | Somatic | 0.000   | 1     |   |
| Y  | 15,681,536  | T | C |                 | 0 | 3                       |  | 359  | 9   | 2.45  | 512  | 41  | 7.41  | 3.71  | Somatic   | 0.015   | 308   | 110 | 26.32 | 13.16 | Somatic | 0.000   | 0     |   |
| Y  | 22,378,497  | C | T | ENSG00000217635 | 3 | 5_prime_flanking_region |  | 217  | 24  | 9.96  | 9    | 209 | 95.87 | 47.94 | Somatic   | 0.000   | 17    | 196 | 92.02 | 46.01 | Somatic | 0.000   | 1     |   |
| Y  | 22,830,969  | C | T | RBMV1J          | 3 | 5_prime_flanking_region |  | 158  | 11  | 6.51  | 12   | 215 | 94.71 | 47.36 | Somatic   | 0.000   | 13    | 321 | 96.11 | 48.05 | Somatic | 0.000   | 1     |   |

**Supplementary Table 3. Annotated Tier 1 Mutations in the MDS and sAML genomes.**

| Chromosome | Position*   | Reference allele | Variant allele | Gene symbol     | Transcript ID   | Strand | Mutation type  | Mutated in MDS | Mutated in sAML | Zygoty | Coding position | Amino acid change |
|------------|-------------|------------------|----------------|-----------------|-----------------|--------|----------------|----------------|-----------------|--------|-----------------|-------------------|
| 1          | 112,325,945 | G                | T              | KCND3           | NM_004980       | -1     | synonymous     | Y              | Y               | Het    | c.927           | I309              |
| 1          | 205,309,412 | C                | G              | PFKFB2          | NM_006212       | 1      | synonymous     | Y              | Y               | Het    | c.1008          | T336              |
| 1          | 229,096,537 | T                | C              | ENSG00000222671 | ENST00000410739 | 1      | non-coding RNA | Y              | Y               | Het    | NA              | NA                |
| 2          | 20,289,990  | C                | T              | LOC100131373    | XM_001720891    | 1      | synonymous     | Y              | Y               | Het    | c.261           | A87               |
| 2          | 61,569,230  | T                | A              | XPO1            | NM_003400       | -1     | missense       | Y              | Y               | Het    | c.2203          | N735Y             |
| 3          | 173,529,456 | C                | A              | FNDC3B          | NM_022763       | 1      | missense       | Y              | Y               | Het    | c.1275          | F425L             |
| 5          | 50,152,869  | C                | G              | PARP8           | NM_024615       | 1      | missense       | Y              | Y               | Het    | c.1734          | F578L             |
| 5          | 148,880,083 | T                | G              | CSNK1A1         | NM_001025105    | -1     | missense       | Y              | Y               | Het    | c.419           | D140A             |
| 6          | 105,713,110 | C                | A              | POPDC3          | NM_022361       | -1     | missense       | Y              | Y               | Het    | c.804           | M268I             |
| 9          | 89,535,224  | T                | G              | CTSL1           | NM_001912       | 1      | missense       | Y              | Y               | Het    | c.893           | V298G             |
| 9          | 138,867,831 | C                | T              | MAMDC4          | NM_206920       | 1      | synonymous     | Y              | Y               | Het    | c.342           | A114              |
| 10         | 82,288,101  | G                | A              | SH2D4B          | NM_207372       | 1      | missense       | Y              | Y               | Het    | c.34            | D12N              |
| 11         | 12,198,538  | C                | G              | MICAL2          | NM_014632       | 1      | missense       | Y              | Y               | Het    | c.1163          | A388G             |
| 11         | 22,340,860  | G                | T              | SLC17A6         | NM_020346       | 1      | splice_site    | Y              | Y               | Het    | c.662-1         | e6-1              |
| 11         | 30,881,639  | A                | G              | DCDC5           | ENST00000406071 | -1     | synonymous     | Y              | Y               | Het    | c.1806          | V602              |
| 14         | 75,418,958  | G                | A              | TLL5            | NM_015072       | 1      | missense       | Y              | Y               | Het    | c.3700          | E1234K            |
| 16         | 7,716,860   | C                | T              | ENSG00000209555 | ENST00000386820 | -1     | non-coding RNA | Y              | Y               | Het    | NA              | NA                |
| 16         | 63,589,987  | C                | T              | CDH11           | NM_001797       | -1     | missense       | Y              | Y               | Het    | c.502           | V168M             |
| 17         | 5,288,451   | T                | G              | DHX33           | NM_020162       | -1     | missense       | Y              | Y               | Het    | c.1922          | Y641S             |
| 17         | 7,696,343   | T                | G              | JMJD3           | NM_001080424    | 1      | missense       | Y              | Y               | Het    | c.4432          | C1478G            |
| 17         | 29,981,226  | C                | T              | TMEM132E        | NM_207313       | 1      | synonymous     | Y              | Y               | Het    | c.1155          | L385              |
| 17         | 75,696,250  | G                | A              | GAA             | NM_000152       | 1      | synonymous     | Y              | Y               | Het    | c.915           | G305              |
| 18         | 46,165,704  | G                | A              | C18orf24        | NM_001039535    | 1      | synonymous     | Y              | Y               | Het    | c.432           | E144              |
| 19         | 53,579,461  | T                | G              | KDELR1          | NM_006801       | -1     | missense       | Y              | Y               | Het    | c.442           | T148P             |
| 19         | 54,349,852  | A                | G              | HRC             | NM_002152       | -1     | missense       | Y              | Y               | Het    | c.455           | L152P             |
| 20         | 32,728,482  | A                | C              | PIGU            | NM_080476       | -1     | missense       | Y              | Y               | Het    | c.69            | S23R              |
| 20         | 32,965,857  | A                | C              | ACSS2           | NM_018677       | 1      | missense       | Y              | Y               | Het    | c.790           | T264P             |
| 20         | 51,626,823  | T                | C              | ZNF217          | NM_006526       | -1     | synonymous     | Y              | Y               | Het    | c.1887          | R629              |
| 21         | 42,402,818  | A                | C              | UMODL1          | NM_173568       | 1      | missense       | Y              | Y               | Het    | c.1597          | T533P             |
| 21         | 43,397,525  | G                | A              | U2AF1           | NM_001025203    | -1     | missense       | Y              | Y               | Het    | c.101           | S34F              |

\*build 36

Supplementary Table 4. U2AF1 Somatic Mutations in MDS.

| UPN     | gene name | chromosome | start    | stop     | reference allele | variant allele | transcript   | strand | mutation type | coding position | amino acid change | SIFT     | SIFT score | PolyPhen2         | PolyPhen2 score |
|---------|-----------|------------|----------|----------|------------------|----------------|--------------|--------|---------------|-----------------|-------------------|----------|------------|-------------------|-----------------|
| 02-86   | U2AF1     | 21         | 43397525 | 43397525 | G                | A              | NM_001025203 | -1     | missense      | c.101           | p.S34F            | damaging | 0          | probably damaging | 1               |
| 185295  | U2AF1     | 21         | 43397525 | 43397525 | G                | A              | NM_001025203 | -1     | missense      | c.101           | p.S34F            | damaging | 0          | probably damaging | 1               |
| 266395  | U2AF1     | 21         | 43397525 | 43397525 | G                | A              | NM_001025203 | -1     | missense      | c.101           | p.S34F            | damaging | 0          | probably damaging | 1               |
| 300813  | U2AF1     | 21         | 43397525 | 43397525 | G                | A              | NM_001025203 | -1     | missense      | c.101           | p.S34F            | damaging | 0          | probably damaging | 1               |
| 321864  | U2AF1     | 21         | 43397525 | 43397525 | G                | A              | NM_001025203 | -1     | missense      | c.101           | p.S34F            | damaging | 0          | probably damaging | 1               |
| 463763  | U2AF1     | 21         | 43397525 | 43397525 | G                | A              | NM_001025203 | -1     | missense      | c.101           | p.S34F            | damaging | 0          | probably damaging | 1               |
| 571656  | U2AF1     | 21         | 43397525 | 43397525 | G                | A              | NM_001025203 | -1     | missense      | c.101           | p.S34F            | damaging | 0          | probably damaging | 1               |
| 843623  | U2AF1     | 21         | 43397525 | 43397525 | G                | A              | NM_001025203 | -1     | missense      | c.101           | p.S34F            | damaging | 0          | probably damaging | 1               |
| 917011  | U2AF1     | 21         | 43397525 | 43397525 | G                | A              | NM_001025203 | -1     | missense      | c.101           | p.S34F            | damaging | 0          | probably damaging | 1               |
| 947519* | U2AF1     | 21         | 43397525 | 43397525 | G                | A              | NM_001025203 | -1     | missense      | c.101           | p.S34F            | damaging | 0          | probably damaging | 1               |
| 989739  | U2AF1     | 21         | 43397525 | 43397525 | G                | A              | NM_001025203 | -1     | missense      | c.101           | p.S34F            | damaging | 0          | probably damaging | 1               |
| 137250  | U2AF1     | 21         | 43397525 | 43397525 | G                | T              | NM_001025203 | -1     | missense      | c.101           | p.S34Y            | damaging | 0          | probably damaging | 1               |
| 937954  | U2AF1     | 21         | 43397525 | 43397525 | G                | T              | NM_001025203 | -1     | missense      | c.101           | p.S34Y            | damaging | 0          | probably damaging | 1               |
| 947519* | U2AF1     | 21         | 43387846 | 43387846 | T                | C              | NM_001025203 | -1     | missense      | c.470           | p.Q157R           | damaging | 0          | probably damaging | 0.999           |

UPN, unique patient number

\* same UPN



**Supplementary Table 5. Characteristics of MDS patients with *U2AF1* Mutations**

| UPN                 | Gender | Age at diagnosis | FAB    | Karyotype                                                                        | %BM Blast | IPSS | Therapy after MDS banking (months)                                       | AML Progression? | OS (months) | EFS (months) |
|---------------------|--------|------------------|--------|----------------------------------------------------------------------------------|-----------|------|--------------------------------------------------------------------------|------------------|-------------|--------------|
| 266395 <sup>a</sup> | M      | 65               | RAEB   | 46,XY[20]                                                                        | 7         | 1    | azacytidine (6)                                                          | yes              | 11          | 2            |
| 137250              | F      | 54               | RAEB   | 46,XX[20]                                                                        | 19        | 2    | standard induction, allogeneic SCT                                       | yes              | 100         | 1            |
| 185295              | M      | 50               | RA     | 46,XY,del(20)(q11.2q13.3)[7]/46,XY,[13]                                          | 0         | 0.5  | PTK/ZK (<1), azacytidine (2), allogeneic SCT                             | no               | 97          | 83           |
| 300813              | F      | 42               | RA     | 46,XX[20]                                                                        | 2         | 0    | none                                                                     | no               | 71          | 71           |
| 321864              | F      | 63               | RAEB   | 46,XX+8[20]                                                                      | 12        | 2.5  | standard induction                                                       | no               | 3           | 3            |
| 571656              | M      | 71               | RAEB   | 46,XY,del(20)(q11.2q13.3)[12]/46XY[8]                                            | 4         | 0.5  | standard induction                                                       | yes              | 10          | 8            |
| 843623              | M      | 60               | RAEB   | 46,XY,del(20)(q11.3)[2]/46,XY[18]                                                | 6         | 1    | none                                                                     | yes              | 5           | 2            |
| 917011              | M      | 79               | RA     | 46,XY,del(20)(q11.2)[12]/ 46,XY[8]                                               | 0         | 0.5  | lenalidomide (3)                                                         | no               | 27          | 25           |
| 937954              | M      | 51               | RAEB   | 47,XY,+8[1]/47, idem, del(16)(q12.1)[13]/48, idem,+Y, del(16)(q11.1)[5]/46,XY[1] | 12        | 2.5  | azacytidine (3)                                                          | no               | 24          | 24           |
| 947519              | M      | 59               | RAEB   | 46,XY,1-5dms[10]/46,XY[12]                                                       | 7         | 1.5  | decitabine (3), allogeneic SCT, standard induction, salvage chemotherapy | yes              | 24          | 23           |
| 02-86               | M      | 53               | RAEB-T | 92<4n>,XXYY,del(4)(q33)x2,del(5)(q13),add(11)(q23)x2[cp8]/46,XY[12]              | 21        | 3    | decitabine (2)                                                           | yes              | 10          | 4            |
| 463763              | M      | 54               | RA     | 47,XY,+Y[6]/46,XY[14]                                                            | 0         | 0.5  | none                                                                     | no               | 46          | 44           |
| 989739              | M      | 71               | RAEB   | 46,XY,del(7)(q21)[11]/47,XY,+8[5]/46,XY[4]                                       | 18        | 3    | decitabine (8)                                                           | yes              | 15          | 4            |

UPN, unique patient number; OS, overall survival; EFS, event-free survival; PTK/ZK (Vatalanib), VEGF inhibitor.

<sup>a</sup>index case







Supplementary Table 7. Clinical Characteristics of MDS replication cohort.

| UPN    | Gender | Age @ Diagnosis | %BM Blast | FAB    | Cytogenetics                                                                                                                                                                                              | [-5, del(5q)] (0=no/1=yes) | [-20, del(20q)] (0=no/1=yes) | [-7, del(7q)] (0=no/1=yes) | [+8] (0=no/1=yes) | IPSS | Disease Status (0 alive/ 1 dead) | Days from Dx to Death or Last Follow-up | Evolution to AML (0=no/1=yes) | Days from Dx to AML or last Follow-up | DNMT3A status (0=wt/1=mut) | U2AF1 status (0=wt/1=mut) |
|--------|--------|-----------------|-----------|--------|-----------------------------------------------------------------------------------------------------------------------------------------------------------------------------------------------------------|----------------------------|------------------------------|----------------------------|-------------------|------|----------------------------------|-----------------------------------------|-------------------------------|---------------------------------------|----------------------------|---------------------------|
| 100901 | M      | 70              | 4         | RA     | 46,XY,del(3)(q21)[16]/46,XY[4]                                                                                                                                                                            | 0                          | 0                            | 0                          | 0                 | 0.5  | 1                                | 1854                                    | 0                             | 1654                                  | 0                          | 0                         |
| 105327 | F      | 54              | 1         | RA     | 46,XX[20]                                                                                                                                                                                                 | 0                          | 0                            | 0                          | 0                 | 0.0  | 1                                | 1647                                    | 0                             | 1646                                  | 0                          | 0                         |
| 112848 | M      | 62              | 5         | RAEB   | 46,XY,del(5)(q13q33)[18]/46,XY[1]/45,XY,-5[1]                                                                                                                                                             | 1                          | 0                            | 0                          | 0                 | 0.5  | 1                                | 2116                                    | 0                             | 2033                                  | 0                          | 0                         |
| 116960 | F      | 55              | 2         | RA     | 46,XX,t(11;13)(q23;q14)[14]/47,idem,+2[12]/46,XX[3]/46,XX,inv(14)(q11,q32)[1]                                                                                                                             | 0                          | 0                            | 0                          | 0                 | 1.0  | 0                                | 2362                                    | 0                             | 2246                                  | 0                          | 0                         |
| 123363 | M      | 64              | 0         | RA     | 46,XY[19]/46,XY,del(20)(q11,q13.1)[1]                                                                                                                                                                     | 0                          | 0                            | 0                          | 0                 | 0.0  | 0                                | 2421                                    | 0                             | 2402                                  | 0                          | 0                         |
| 124124 | F      | 66              | 18        | RAEB   | 46,XX[20]                                                                                                                                                                                                 | 0                          | 0                            | 0                          | 0                 | 2.0  | 1                                | 998                                     | 1                             | 891                                   | 0                          | 0                         |
| 127804 | M      | 63              | 2         | RA     | 46,XY[20]                                                                                                                                                                                                 | 0                          | 0                            | 0                          | 0                 | 0.5  | 1                                | 2375                                    | 0                             | 2368                                  | 0                          | 0                         |
| 131153 | M      | 78              | 8         | RAEB   | 44,XY,dup(3)(p21p25),-5,-6,del(12)(q15q22),psu dic(15;14)(p13;q32),add(17)(p11.2),add(19)(q13.3),7i(22;22)(q12.13),+mar[20]                                                                               | 1                          | 0                            | 0                          | 0                 | 2.0  | 1                                | 621                                     | 0                             | 619                                   | 0                          | 0                         |
| 137250 | F      | 54              | 19        | RAEB   | 46,XX[20]                                                                                                                                                                                                 | 0                          | 0                            | 0                          | 0                 | 2.0  | 0                                | 3037                                    | 1                             | 38                                    | 0                          | 1                         |
| 137313 | F      | 77              | 0         | RA     | 47,XX,+8[6]/46,XX[14]                                                                                                                                                                                     | 0                          | 0                            | 0                          | 1                 | 1.0  | 1                                | 320                                     | 0                             | 144                                   | 0                          | 0                         |
| 137404 | F      | 70              | 0         | RAR    | 46,XX,add(1)(p11.1),del(1)(q23),add(3)(p13),del(5)(q13q33),add(8)(p11.2),add(9)(q22),add(10)(q22),add(11)(p14),-12,del(17)(q21),+mar[17]/46,XX[3]                                                         | 1                          | 0                            | 0                          | 0                 | 1.0  | 1                                | 674                                     | 0                             | 663                                   | 0                          | 0                         |
| 173005 | M      | 77              | 10        | RAEB   | 45,XY,der(3)(5)(p10;p10),-18,-20,+2mar[12]/46,idem,+2[5]/46,XY[3]                                                                                                                                         | 0                          | 0                            | 0                          | 0                 | 2.0  | 1                                | 800                                     | 0                             | 71                                    | 0                          | 0                         |
| 176267 | M      | 56              | 7         | RAEB   | 43-47,XY,del(5)(q13q33),der(7)(7;11)(q11.2;q21),-9,-12,der(16)t(12;16)(q10;q22),add(16)(q23),+mar1,+mar2[cp12]/44-46,XY,del(5)(q13q33),der(7)t(7;11)(q11.2;q21),-12,del(16)(q10;q22)[cp8]                 | 1                          | 0                            | 0                          | 0                 | 2.0  | 1                                | 137                                     | 1                             | 93                                    | 1                          | 0                         |
| 177356 | F      | 76              | 2         | RA     | 46,XX[20]                                                                                                                                                                                                 | 0                          | 0                            | 0                          | 0                 | 0.0  | 0                                | 1304                                    | 0                             | 747                                   | 0                          | 0                         |
| 182896 | M      | 75              | 0         | RA     | 46,XY,add(4)(p16),t(4;20)(q25;p13),del(5)(q13q33)[13]/46,idem,del(6)(q25)[1]/47,XY,+8[6]                                                                                                                  | 0                          | 0                            | 0                          | 1                 | 1.0  | 1                                | 1205                                    | 1                             | 1047                                  | 0                          | 0                         |
| 184368 | F      | 49              | 0         | RA     | 46,XX[20]                                                                                                                                                                                                 | 0                          | 0                            | 0                          | 0                 | 0.0  | 0                                | 2013                                    | 0                             | 81                                    | 0                          | 0                         |
| 184874 | F      | 56              | 2         | RAR    | 47,XX,+8[10]/46,XX[10]                                                                                                                                                                                    | 0                          | 0                            | 0                          | 1                 | 0.5  | 1                                | 2020                                    | 0                             | 2020                                  | 0                          | 0                         |
| 185295 | M      | 50              | 0         | RA     | 46,XY,del(20)(q11,q13.3)[7]/46,XY[13]                                                                                                                                                                     | 0                          | 1                            | 0                          | 0                 | 0.5  | 0                                | 2539                                    | 0                             | 2536                                  | 0                          | 1                         |
| 189012 | M      | 64              | 3         | RA     | 46,XY,del(5)(q15q33)[16]/46,XY,del(5)(q12q33),del(7)(q21q32)[1]/46,XY[3]                                                                                                                                  | 1                          | 0                            | 0                          | 0                 | 0.5  | 0                                | 1250                                    | 0                             | 1230                                  | 0                          | 0                         |
| 189474 | M      | 61              | 4         | RAEB   | 46,XY[3]                                                                                                                                                                                                  | 0                          | 0                            | 0                          | 0                 | 0.0  | 0                                | 1336                                    | 0                             | 907                                   | 0                          | 0                         |
| 194328 | M      | 52              | 1         | RA     | 46,XY[20]                                                                                                                                                                                                 | 0                          | 0                            | 0                          | 0                 | 0.5  | 0                                | 1702                                    | 0                             | 809                                   | 0                          | 0                         |
| 197795 | M      | 50              | 17        | RAEB   | 46,XY[20]                                                                                                                                                                                                 | 0                          | 0                            | 0                          | 0                 | 1.5  | 1                                | 1064                                    | 0                             | 457                                   | 0                          | 0                         |
| 199019 | F      | 60              | 0         | RA     | 45-49,XX,+1,add(3)(p11),del(5)(q13q33),del(10)(q24q26),add(18)(q21),+19,-20,+21,+1-2mar[cp20]                                                                                                             | 1                          | 1                            | 0                          | 0                 | 1.5  | 1                                | 1491                                    | 1                             | 1020                                  | 0                          | 0                         |
| 201641 | M      | 62              | 14        | RAEB   | 44-45,XY,del(3)(q12),add(5)(q35),del(5)(q12q33),del(7)(q22),-12,der(17)t(7;17)(q22p13)[15]/46,XY[5]                                                                                                       | 1                          | 0                            | 1                          | 0                 | 3.0  | 1                                | 220                                     | 0                             | 199                                   | 0                          | 0                         |
| 207282 | M      | 76              | 11        | RAEB   | 46,XY[20]                                                                                                                                                                                                 | 0                          | 0                            | 0                          | 0                 | 2.0  | 1                                | 251                                     | 1                             | 122                                   | 1                          | 0                         |
| 222841 | F      | 46              | 17        | RAEB   | 60<3ns>,XX,-X,add(1)(q44),ins(1)(p36)add(1)(q12),-5,del(5)(q11,q23q33),+6,-7,add(7)(p22),-10,-11,del(12)(q13),add(12)(p13),-13,-14,hsr(14)(p11.1),-16,-16,-18,der(19;21)(q10;q10),+21,-22,+mar5/46,XX[15] | 1                          | 0                            | 1                          | 0                 | 2.5  | 1                                | 528                                     | 0                             | 528                                   | 0                          | 0                         |
| 266395 | M      | 65              | 7         | RAEB   | 46,XY[20]                                                                                                                                                                                                 | 0                          | 0                            | 0                          | 0                 | 1.0  | 1                                | 321                                     | 1                             | 75                                    | 0                          | 1                         |
| 280933 | F      | 31              | 13        | RAEB   | 46,XX[20]                                                                                                                                                                                                 | 0                          | 0                            | 0                          | 0                 | 2.0  | 1                                | 367                                     | 0                             | 28                                    | 0                          | 0                         |
| 298273 | M      | 27              | 18        | RAEB-T | 46,XY[20]                                                                                                                                                                                                 | 0                          | 0                            | 0                          | 0                 | 2.0  | 1                                | 540                                     | 1                             | 131                                   | 0                          | 0                         |
| 300813 | F      | 42              | 2         | RA     | 46,XX[20]                                                                                                                                                                                                 | 0                          | 0                            | 0                          | 0                 | 0.0  | 0                                | 2172                                    | 0                             | 2172                                  | 0                          | 1                         |
| 312519 | F      | 71              | 0         | RA     | 46,XX[20]                                                                                                                                                                                                 | 0                          | 0                            | 0                          | 0                 | 0.5  | 1                                | 1026                                    | 0                             | 436                                   | 0                          | 0                         |
| 313175 | M      | 74              | 5         | RAEB   | 46,XY[20]                                                                                                                                                                                                 | 0                          | 0                            | 0                          | 0                 | 0.0  | 0                                | 961                                     | 0                             | 702                                   | 0                          | 0                         |
| 315529 | M      | 56              | 12        | RAEB   | 46,XY,add(7)(q32),r(8)(p21q24.3),add(11)(p15),t(12;13)(q24.2;q13),-17,r(19)(p13.3q13.4),-20,add(20)(q13.1),-21,+3mar[18]/46,idem,del(5)(q22q34)[1]/46,XY[1]                                               | 0                          | 1                            | 0                          | 0                 | 3.0  | 1                                | 147                                     | 0                             | 147                                   | 0                          | 0                         |
| 317598 | M      | 86              | 11        | RAEB   | 46,XY[20]                                                                                                                                                                                                 | 0                          | 0                            | 0                          | 0                 | 2.0  | 1                                | 30                                      | 0                             | 30                                    | 1                          | 0                         |
| 319179 | F      | 74              | 6         | RAEB   | 46,XX[20]                                                                                                                                                                                                 | 0                          | 0                            | 0                          | 0                 | 0.5  | 1                                | 483                                     | 1                             | 482                                   | 1                          | 0                         |
| 321864 | F      | 63              | 12        | RAEB   | 47,XX,+8[20]                                                                                                                                                                                              | 0                          | 0                            | 0                          | 0                 | 2.5  | 1                                | 80                                      | 0                             | 80                                    | 0                          | 1                         |
| 323977 | M      | 65              | 0         | RA     | 46,XY[20]                                                                                                                                                                                                 | 0                          | 0                            | 0                          | 0                 | 0.5  | 1                                | 249                                     | 0                             | 186                                   | 0                          | 0                         |
| 335224 | M      | 65              | 3         | RA     | 45,XY,del(5)(q22q33),hsr(11)(p15),der(17;22)(q10;q10)[17]/45,XY,idem,hsr(11)(p15)(q23)[3]                                                                                                                 | 1                          | 0                            | 0                          | 0                 | 1.5  | 1                                | 202                                     | 1                             | 104                                   | 0                          | 0                         |
| 335875 | F      | 46              | 2         | RA     | 46,XX[20]                                                                                                                                                                                                 | 0                          | 0                            | 0                          | 0                 | 0.0  | 0                                | 1387                                    | 0                             | 1229                                  | 0                          | 0                         |
| 337081 | M      | 67              | 10        | RAEB   | 46,XY[20]                                                                                                                                                                                                 | 0                          | 0                            | 0                          | 0                 | 0.5  | 1                                | 1108                                    | 0                             | 31                                    | 0                          | 0                         |
| 342760 | F      | 77              | 12        | RAEB   | 46,XX[20]                                                                                                                                                                                                 | 0                          | 0                            | 0                          | 0                 | 1.5  | 1                                | 1447                                    | 0                             | 1447                                  | 0                          | 0                         |
| 343306 | F      | 62              | 15        | RAEB   | 40-45,XX,-4,-5,add(10)(p15),add(15)(p11.2),-17,+add(19)(p13.3),add(21)(p11.2),-22,+mar[cp3]/46,XX[10]-only 13 analyzed                                                                                    | 1                          | 0                            | 0                          | 0                 | 3.0  | 1                                | 686                                     | 0                             | 683                                   | 0                          | 0                         |
| 346313 | M      | 62              | 6         | RAEB   | 46,XY[20]                                                                                                                                                                                                 | 0                          | 0                            | 0                          | 0                 | 1.0  | 1                                | 965                                     | 1                             | 787                                   | 0                          | 0                         |
| 350460 | M      | 30              | 4         | RA     | 46,XY[17]                                                                                                                                                                                                 | 0                          | 0                            | 0                          | 0                 | 0.5  | 1                                | 905                                     | 0                             | 904                                   | 0                          | 0                         |
| 362699 | F      | 73              | 2         | RA     | 46,XX[18]/47,XX,+4[1]/47,XX,+9[1]                                                                                                                                                                         | 0                          | 0                            | 0                          | 0                 | 0.5  | 1                                | 307                                     | 0                             | 127                                   | 0                          | 0                         |
| 369682 | M      | 59              | ND        | RA     | 45,XY,der(5)t(3;5)(q21;q13)[9]/46,idem,+8[6]/46,idem,+mar[1]/46,XY[4]                                                                                                                                     | 0                          | 0                            | 0                          | 1                 | UK   | 1                                | 84                                      | 1                             | 81                                    | 0                          | 0                         |
| 372440 | M      | 59              | 2         | RA     | 46,XY[20]                                                                                                                                                                                                 | 0                          | 0                            | 0                          | 0                 | 0.0  | 0                                | 1891                                    | 0                             | 1894                                  | 0                          | 0                         |
| 379929 | F      | 39              | 3         | RA     | 46,XX[20]                                                                                                                                                                                                 | 0                          | 0                            | 0                          | 0                 | 0.5  | 1                                | 290                                     | 1                             | 224                                   | 1                          | 0                         |
| 391828 | M      | 50              | 3         | RA     | 46,XY,inv(3)(q21q26.2)[6]/46,XY[14]                                                                                                                                                                       | 0                          | 0                            | 0                          | 0                 | 1.0  | 1                                | 1852                                    | 0                             | 1852                                  | 0                          | 0                         |
| 392543 | M      | 74              | 13        | RAEB   | 55-57,XY,+1,+2,+6,der(7)(7;11)(p22;q13),+9,-10,+11,+13,+14,add(14)(p11.2),add(17)(p11.2),-18,+21,add(21)(p11.2),+22,+1-2r,+1-3mar[cp7]/46,XY[13]                                                          | 0                          | 0                            | 0                          | 0                 | 2.5  | 1                                | 599                                     | 1                             | 589                                   | 0                          | 0                         |
| 395621 | F      | 35              | 6         | RAEB   | 46,XX,der(15)t(1;15)(q10;q10)[15]/46,XX[5]                                                                                                                                                                | 0                          | 0                            | 0                          | 0                 | 1.0  | 1                                | 541                                     | 1                             | 140                                   | 0                          | 0                         |
| 411330 | M      | 83              | 2         | RA     | 45,X,-Y[3]/46,XY[17]                                                                                                                                                                                      | 0                          | 0                            | 0                          | 0                 | 0.0  | 1                                | 18                                      | 0                             | 18                                    | 0                          | 0                         |
| 421452 | F      | 33              | 10        | RAEB   | 46,XX[20]                                                                                                                                                                                                 | 0                          | 0                            | 0                          | 0                 | 1.0  | 0                                | 2016                                    | 1                             | 90                                    | 0                          | 0                         |
| 429531 | F      | 38              | 0         | RA     | 46,XX,del(5)(q12q33)[18]/46,XX[2]                                                                                                                                                                         | 1                          | 0                            | 0                          | 0                 | 0.5  | 0                                | 2951                                    | 0                             | 2577                                  | 0                          | 0                         |
| 430998 | M      | 56              | 0         | RA     | 47,XY,+14[5],46,XY,t(14;14)(q10;5)/46,XY[10]                                                                                                                                                              | 0                          | 0                            | 0                          | 0                 | 0.5  | 0                                | 1067                                    | 0                             | 706                                   | 0                          | 0                         |
| 431137 | M      | 55              | 7         | RAEB   | 46,XY,add(3)(p25),del(3)(p13),del(6)(q15q31),-6,+8,add(12)(p11.2),add(15)(p11.1),+18,+22[cp4]/44,sl,-8,-20,-22,+mar[cp5]/44,sl,-del(3),-7,+2mar[cp5]/43,sl,add(XX)(q28),+add(12p),+12,-mar[cp6]           | 1                          | 1                            | 1                          | 1                 | 2.0  | 1                                | 181                                     | 0                             | 181                                   | 0                          | 0                         |
| 431586 | M      | 68              | 6         | RAEB   | 87,XY,+X,+1,+1,+2,+2,+3,+3,+4,+4,+5,+5,+6,+6,+7,+7,+8,+8,+9,+9,+10,+10,+11,+11,+12,+12,+13,+13,+14,+14,+15,+15,+16,+16,+17,+17,+18,+18,+19,+19,+20,+20,+21,+21,+22,+22[3]/46,XY[22]                       | 0                          | 0                            | 0                          | 1                 | 1.5  | 1                                | 337                                     | 1                             | 275                                   | 0                          | 0                         |
| 447189 | M      | 76              | 0         | RA     | 46,XY[20]                                                                                                                                                                                                 | 0                          | 0                            | 0                          | 0                 | 0.5  | 0                                | 1795                                    | 0                             | 1436                                  | 0                          | 0                         |
| 455113 | F      | 68              | 2         | RA     | 46,XY[20]                                                                                                                                                                                                 | 0                          | 0                            | 0                          | 0                 | 0.0  | 0                                | 2244                                    | 0                             | 1982                                  | 0                          | 0                         |
| 455194 | M      | 62              | 2         | RA     | 47,XY,+8[19]/46,XY[1]                                                                                                                                                                                     | 0                          | 0                            | 0                          | 1                 | 0.5  | 0                                | 1529                                    | 0                             | 1302                                  | 0                          | 0                         |
| 457721 | M      | 63              | 22        | RAEB-T | 46,XY[20]                                                                                                                                                                                                 | 0                          | 0                            | 0                          | 0                 | 2.5  | 1                                | 398                                     | 1                             | 173                                   | 1                          | 0                         |
| 461282 | M      | 65              | 6         | RAEB   | 46,XY,-17,del(20)(q11.2),r(5)/46,idem,del(5)(q31q33)[10]/46,idem,del(5)(q13q33)[3]/46,idem,-X,add(X)(q22),der(12)t(12;7)(p11.2;7)del(12)(q22)[2]                                                          | 1                          | 1                            | 0                          | 0                 | 2.0  | 1                                | 2009                                    | 1                             | 1751                                  | 0                          | 0                         |
| 461321 | F      | 78              | 6         | RAEB   | 46,XX[18]                                                                                                                                                                                                 | 0                          | 0                            | 0                          | 0                 | 0.5  | 0                                | 981                                     | 1                             | 178                                   | 0                          | 0                         |
| 462596 | M      | 78              | 0         | RA     | 46,XY[20]                                                                                                                                                                                                 | 0                          | 0                            | 0                          | 0                 | 0.5  | 1                                | 395                                     | 0                             | 177                                   | 0                          | 0                         |
| 463763 | M      | 54              | 0         | RA     | 47,XY,+Y[6]/46,XY[14]                                                                                                                                                                                     | 0                          | 0                            | 0                          | 0                 | 0.5  | 0                                | 1385                                    | 0                             | 1332                                  | 0                          | 1                         |
| 485523 | M      | 62              | 11        | RAEB   | 46,XY[20]                                                                                                                                                                                                 | 0                          | 0                            | 0                          | 0                 | 2.0  | 0                                | 814                                     | 0                             | 804                                   | 0                          | 0                         |
| 497942 | M      | 38              | 0         | RA     | 46,XY,der(1;22)(q10;q10)[4]/46,XY[16]                                                                                                                                                                     | 0                          | 0                            | 0                          | 0                 | 1.0  | 1                                | 4626                                    | 0                             | 4553                                  | 0                          | 0                         |
| 511734 | M      | 69              | 4         | RAEB-T | 46,XY[20]                                                                                                                                                                                                 | 0                          | 0                            | 0                          | 0                 | 0.0  | 1                                | 353                                     | 0                             | 353                                   | 0                          | 0                         |
| 518747 | F      | 47              | 6         | RAEB   | 46,XX[11]                                                                                                                                                                                                 | 0                          | 0                            | 0                          | 0                 | 1.0  | 0                                | 844                                     | 0                             | 816                                   | 0                          | 0                         |
| 530722 | M      | 69              | 13        | RAEB   | 46,XY[20]                                                                                                                                                                                                 | 0                          | 0                            | 0                          | 0                 | 2.0  | 1                                | 311                                     | 1                             | 24                                    | 0                          | 0                         |
| 530724 | F      | 67              | 11        | RAEB   | Failed                                                                                                                                                                                                    | 0                          | 0                            | 0                          | 0                 | UK   | 1                                | 32                                      | 0                             | 12                                    | 0                          | 0                         |
| 537426 | F      | 57              | 2         | RA     | 45,XX,-7[20]                                                                                                                                                                                              | 0                          | 0                            | 1                          | 0                 | 1.5  | 0                                | 1908                                    | 0                             | 1833                                  | 0                          | 0                         |
| 538267 | F      | 49              | 12        | RAEB   | 42-48,XX,-X,(3;17)(q21;q21),del(5)(q15q33),-10,t(2;18)(q11.2;q11.2),-12,-13,t(17;20)(q21;11.2)add(17)(p11.2),dic(19;21)(p13q22),+r,+mar[cp18]/46,XX[2]                                                    | 1                          | 0                            | 0                          | 0                 | 3.0  | 1                                | 407                                     | 0                             | 407                                   | 0                          | 0                         |
| 543465 | M      | 75              | 11        | RAEB   | 46,XY[20]                                                                                                                                                                                                 | 0                          | 0                            | 0                          | 0                 | 2.0  | 0                                | 3080                                    | 1                             | 160                                   | 0                          | 0                         |
| 547403 | M      | 61              | 16        | RAEB   | 46,X,-Y,+14[2]/45,X,-Y[2]/45,XY,-20[1]                                                                                                                                                                    | 0                          | 0                            | 0                          | 0                 | 2.5  | 1                                | 132                                     | 0                             | 132                                   | 0                          | 0                         |
| 554562 | M      | 80              | 0         | RA     | 46,XY,del(20)(q11,q13.3)[8]/46,XY,+8[3]/46,XY[9]                                                                                                                                                          | 0                          | 1                            | 0                          | 0                 | 0.5  | 1                                | 1256                                    | 1                             | 1314                                  | 0                          | 0                         |
| 557468 | M      | 76              | 18        | RAEB   | 46,XY[20]                                                                                                                                                                                                 | 0                          | 0                            | 0                          | 0                 | 2.0  | 1                                | 712                                     | 1                             | 217                                   | 0                          | 0                         |
| 558896 | M      | 73              | 15        | RAEB   | 47-50,XY,t(2;19)(p16;p13),del(5)(q12q33),-11,-18,-20,+r,+2-6mar[4]/41-50,sl,+5,del(5)(q12q33)[8]/47-50,sl,t,r[8]                                                                                          | 1                          | 1                            | 0                          | 0                 | 3.0  | 1                                | 57                                      | 0                             | 57                                    | 0                          | 0                         |
| 571656 | M      | 71              | 4         | RAEB   | 46,del(20)(q11.2q13.3)[12]/46,XY[8]                                                                                                                                                                       | 0                          | 1                            | 0                          | 0                 | 0.5  | 1                                | 303                                     | 1                             | 231                                   | 0                          | 1                         |
| 574490 | M      | 57              | 1         | RA     | 46,XY[20]                                                                                                                                                                                                 | 0                          | 0                            | 0                          | 0                 | 0.0  | 1                                | 874                                     | 0                             | 874                                   | 0                          | 0                         |

|        |   |    |    |        |                                                                                                                                                                                                                                                                                                    |   |   |   |   |     |   |      |   |      |   |   |
|--------|---|----|----|--------|----------------------------------------------------------------------------------------------------------------------------------------------------------------------------------------------------------------------------------------------------------------------------------------------------|---|---|---|---|-----|---|------|---|------|---|---|
| 643607 | F | 79 | 3  | RA     | 46.XX[20]                                                                                                                                                                                                                                                                                          | 0 | 0 | 0 | 0 | 0.0 | 1 | 897  | 0 | 14   | 0 | 0 |
| 657314 | F | 28 | 4  | RAEB   | 45.XX-7[5]                                                                                                                                                                                                                                                                                         | 0 | 0 | 1 | 0 | 1.5 | 0 | 1704 | 0 | 1681 | 0 | 0 |
| 667720 | F | 66 | 10 | RAEB   | 46.XX[20]                                                                                                                                                                                                                                                                                          | 0 | 0 | 0 | 0 | 1.0 | 1 | 724  | 1 | 644  | 0 | 0 |
| 672525 | F | 73 | 5  | RAEB   | 46.XX[20]                                                                                                                                                                                                                                                                                          | 0 | 0 | 0 | 0 | 1.0 | 1 | 2395 | 0 | 2247 | 0 | 0 |
| 684211 | F | 62 | 1  | RAR    | 46.XX.del(5)(q13q33).del(20)(q11.2)[cp5]                                                                                                                                                                                                                                                           | 1 | 1 | 0 | 0 | 0.5 | 1 | 325  | 1 | 231  | 0 | 0 |
| 690100 | M | 66 | 15 | RAEB   | 43-45.XY.del(5)(q22q35).der(16)(16.17)(q22;q21).-17.add(17)(p11.2).-18.dic(18;21)(p11.1;q22).der(22)(1:22)(p13;p11.2).+0-2mar[cp19]/47.XY.+12[1]                                                                                                                                                   | 1 | 0 | 0 | 0 | 3.0 | 1 | 331  | 1 | 324  | 1 | 0 |
| 693881 | F | 78 | 11 | RAEB   | 44.XX.-3.del(5)(q13q33).-7.add(9)(q22).add(13)(p11.2).-18.add(18)(p11.2).-20.+2mar[18]/46.XX[2]                                                                                                                                                                                                    | 1 | 1 | 1 | 0 | 3.0 | 1 | 383  | 0 | 369  | 0 | 0 |
| 696026 | M | 48 | 0  | RA     | 47.XY.+8[2]/47.idem.add(3)(q21)[6]/47.add(3)(q21).del(12)(p11.2p13)[12]                                                                                                                                                                                                                            | 0 | 0 | 0 | 1 | 1.5 | 0 | 4566 | 0 | 4498 | 0 | 0 |
| 697296 | M | 71 | 3  | RA     | 46.XY[20]                                                                                                                                                                                                                                                                                          | 0 | 0 | 0 | 0 | 0.5 | 1 | 1385 | 0 | 87   | 0 | 0 |
| 698840 | F | 77 | 13 | RAEB   | 46.XX.del(5)(q13q23)[1]42-47.si.dic(15;20)(p11.2;q13.3).add(22)(p11.1)[cp3]/44-47.si.dic(3;15)(p11.2;q11.1).der(14;22)(q10;q10).+0-5mar[cp6]/82-87.sbx2.-3.del(4)(q727)x2.-7.add(12)(p11.2)x2.der(15;21)(q10;q10).der(15;22)(q10;q10).-17.-17.+19.-21.add(21)(p11.2).-22.-22.+0-5mar[cp9]/46.XX[1] | 0 | 0 | 1 | 0 | 3.0 | 1 | 253  | 0 | 7    | 0 | 0 |
| 703653 | F | 20 | 0  | RA     | 46.XY[20]                                                                                                                                                                                                                                                                                          | 0 | 0 | 0 | 0 | 0.5 | 0 | 2257 | 0 | 2092 | 0 | 0 |
| 705782 | M | 34 | 5  | RAEB   | 46.XY.[3;5](q21;q31)[13]/46.idem.?add(12)(q24.3)[5]/46.XY.?add(12)(q24.3)[2]                                                                                                                                                                                                                       | 0 | 0 | 0 | 0 | 2.0 | 0 | 1711 | 0 | 1703 | 0 | 0 |
| 717045 | F | 48 | 2  | RA     | 46.XX.del(5)(q13q33)[20]                                                                                                                                                                                                                                                                           | 1 | 0 | 0 | 0 | 0.5 | 1 | 393  | 0 | 393  | 0 | 0 |
| 732776 | F | 47 | 8  | RAEB   | 46.XX[20]                                                                                                                                                                                                                                                                                          | 0 | 0 | 0 | 0 | 1.0 | 0 | 2255 | 0 | 11   | 0 | 0 |
| 736895 | M | 54 | 2  | RA     | 43-49.XY.-4.-5.-7.add(12)(p11.2).-20.-21.+1-6mar[cp7]                                                                                                                                                                                                                                              | 1 | 1 | 1 | 0 | 1.5 | 1 | 38   | 0 | 26   | 0 | 0 |
| 747967 | M | 41 | 2  | RA     | 46.XY.+1.der(1:15)(q10;q10)[8]/46.XY.+1.der(1:7)(q10;p10)[4]/46.XY[8]                                                                                                                                                                                                                              | 0 | 0 | 0 | 0 | 1.0 | 0 | 1940 | 0 | 1899 | 0 | 0 |
| 753222 | M | 79 | 0  | RA     | 60-61.XXY.add(3)(p21).del(5)(q13q33).add(6)(q25).-7.-8.-9.add(14)(p11.2).-16.-17.+19.add(19)(q13.4)x2.-22[cp2]/46.XY[68]                                                                                                                                                                           | 1 | 0 | 1 | 0 | 1.5 | 1 | 123  | 0 | 123  | 0 | 0 |
| 783437 | M | 63 | 8  | RAEB   | 46.XY[20]                                                                                                                                                                                                                                                                                          | 0 | 0 | 0 | 0 | 1.0 | 1 | 1095 | 1 | 594  | 0 | 0 |
| 785104 | F | 44 | 2  | RA     | 46.XX[20]                                                                                                                                                                                                                                                                                          | 0 | 0 | 0 | 0 | 0.0 | 0 | 1317 | 0 | 1172 | 0 | 0 |
| 791334 | F | 66 | 3  | RA     | 46.XX[20]                                                                                                                                                                                                                                                                                          | 0 | 0 | 0 | 0 | 0.5 | 1 | 923  | 0 | 923  | 0 | 0 |
| 804059 | M | 69 | 9  | RAEB   | 47.XY.+8[20]                                                                                                                                                                                                                                                                                       | 0 | 0 | 0 | 0 | 1.5 | 1 | 878  | 1 | 287  | 0 | 0 |
| 809605 | M | 75 | 14 | RAEB   | 46.XY[12]                                                                                                                                                                                                                                                                                          | 0 | 0 | 0 | 0 | 2.0 | 0 | 849  | 0 | 849  | 0 | 0 |
| 817019 | F | 65 | 3  | RA     | 46.XX.idel(20)(q11.2)[9]/46.XX[11]                                                                                                                                                                                                                                                                 | 0 | 1 | 0 | 0 | 0.0 | 0 | 1172 | 0 | 861  | 0 | 0 |
| 827584 | M | 62 | 8  | RAEB   | 47.XY.+8[15]/46.XY[5]                                                                                                                                                                                                                                                                              | 0 | 0 | 0 | 1 | 1.0 | 0 | 1710 | 0 | 1703 | 0 | 0 |
| 843623 | M | 60 | 6  | RAEB   | 46.XY.del(20)(q11.2q13.3)[2]/46.XY[18]                                                                                                                                                                                                                                                             | 0 | 1 | 0 | 0 | 1.0 | 1 | 139  | 1 | 71   | 0 | 1 |
| 845446 | M | 73 | 13 | RAEB   | 47.XY.+8.del(12)(p11.2p13)[18]/47.idem.del(3)(q21)[2]                                                                                                                                                                                                                                              | 0 | 0 | 0 | 1 | 3.0 | 1 | 251  | 0 | 251  | 0 | 0 |
| 846155 | M | 64 | 0  | RA     | 46.XY[20]                                                                                                                                                                                                                                                                                          | 0 | 0 | 0 | 0 | 0.5 | 0 | 1023 | 0 | 1026 | 0 | 0 |
| 854400 | M | 63 | 0  | RA     | 46.XY.Yqh+20]                                                                                                                                                                                                                                                                                      | 0 | 0 | 0 | 0 | 0.0 | 1 | 945  | 0 | 923  | 0 | 0 |
| 855934 | M | 62 | 26 | RAEB-T | 46.XY[20]                                                                                                                                                                                                                                                                                          | 0 | 0 | 0 | 0 | 2.5 | 0 | 453  | 0 | 453  | 0 | 0 |
| 857645 | M | 60 | ND | RA     | 46.XY[20]                                                                                                                                                                                                                                                                                          | 0 | 0 | 0 | 0 | UK  | 1 | 860  | 1 | 821  | 0 | 0 |
| 859640 | F | 64 | 3  | RA     | 46.XX[20]                                                                                                                                                                                                                                                                                          | 0 | 0 | 0 | 0 | 1.5 | 1 | 609  | 1 | 252  | 0 | 0 |
| 861691 | M | 62 | 13 | RAEB   | 45.XY.-7[15]/46.XY[5]                                                                                                                                                                                                                                                                              | 0 | 0 | 1 | 0 | 3.0 | 0 | 3144 | 0 | 118  | 0 | 0 |
| 875301 | F | 62 | 14 | RAEB   | 46.XX[20]                                                                                                                                                                                                                                                                                          | 0 | 0 | 0 | 0 | 1.5 | 1 | 463  | 1 | 81   | 0 | 0 |
| 879047 | F | 74 | 17 | RAEB   | 46.XX.del(11)(q21q24)[13]/46.XX[7]                                                                                                                                                                                                                                                                 | 0 | 0 | 0 | 0 | 2.5 | 1 | 980  | 0 | 980  | 0 | 0 |
| 882525 | M | 57 | 7  | RAEB   | 41-49.XY.+X.+X.del(5)(q22q35).del(7)(q22).+8.-12.add(12)(p12).-13.-18.+1-4mar[cp20]                                                                                                                                                                                                                | 1 | 0 | 1 | 1 | 2.0 | 1 | 148  | 1 | 88   | 0 | 0 |
| 889352 | M | 72 | 14 | RAEB   | 39-44.XY.del(4)(q31)[14].der(5)(5:7)(q21:?) [17].del(6)(q21)[19].-7[19].add(12)(p13)[18].-18[18][cp19]                                                                                                                                                                                             | 0 | 0 | 1 | 0 | 3.0 | 1 | 42   | 0 | 42   | 0 | 0 |
| 911999 | M | 36 | 4  | RA     | 46.XY[20]                                                                                                                                                                                                                                                                                          | 0 | 0 | 0 | 0 | 0.0 | 0 | 3250 | 0 | 3232 | 0 | 0 |
| 912290 | M | 59 | 1  | RA     | 46.XY[20]                                                                                                                                                                                                                                                                                          | 0 | 0 | 0 | 0 | 0.5 | 1 | 696  | 0 | 696  | 0 | 0 |
| 917011 | M | 79 | 0  | RA     | 46.XY.del(20)(q11.2)[12]/46.XY[8]                                                                                                                                                                                                                                                                  | 0 | 1 | 0 | 0 | 0.5 | 1 | 809  | 0 | 769  | 1 | 1 |
| 936943 | M | 43 | ND | RAEB   | failed.                                                                                                                                                                                                                                                                                            | 0 | 0 | 0 | 0 | UK  | 1 | 1300 | 0 | 1289 | 0 | 0 |
| 937954 | M | 51 | 12 | RAEB   | 47.XY.+8[1]/47.idem.del(16)(q12.1)[13]/48.idem.+Y.del(16)(q11.1)[5]/46.XY[1]                                                                                                                                                                                                                       | 0 | 0 | 0 | 1 | 2.5 | 1 | 729  | 0 | 131  | 0 | 1 |
| 943264 | M | 65 | 11 | RAEB   | 46.XY[20]                                                                                                                                                                                                                                                                                          | 0 | 0 | 0 | 0 | 1.5 | 0 | 891  | 0 | 848  | 0 | 0 |
| 944541 | M | 54 | 20 | RAEB   | 45.XY.-7[19]/46.XY[1]                                                                                                                                                                                                                                                                              | 0 | 0 | 1 | 0 | 3.0 | 1 | 1630 | 0 | 1630 | 0 | 0 |
| 947519 | M | 59 | 7  | RAEB   | 46.XY.1-5dms[10]/46.XY[12]                                                                                                                                                                                                                                                                         | 0 | 0 | 0 | 0 | 1.5 | 1 | 734  | 1 | 699  | 0 | 1 |
| 949197 | F | 60 | 2  | RA     | failed                                                                                                                                                                                                                                                                                             | 0 | 0 | 0 | 0 | UK  | 1 | 108  | 0 | 89   | 0 | 0 |
| 958595 | F | 82 | 4  | RA     | 46.XX.del(11)(q23)[20]                                                                                                                                                                                                                                                                             | 0 | 0 | 0 | 0 | 1.0 | 1 | 975  | 0 | 975  | 1 | 0 |
| 973424 | M | 56 | 3  | RA     | 46.XY[20]                                                                                                                                                                                                                                                                                          | 0 | 0 | 0 | 0 | 0.0 | 0 | 1228 | 0 | 1027 | 0 | 0 |
| 975079 | M | 62 | 0  | RA     | 46.XY[20]                                                                                                                                                                                                                                                                                          | 0 | 0 | 0 | 0 | 0.0 | 1 | 1563 | 0 | 1563 | 1 | 0 |
| 983677 | F | 60 | 8  | RAEB   | 46.XX.del(5)(q21q35)[4]/69.XX.+X.+1.+1.+2.+del(5)(q21q35).+5.+6.+8.+9.+9.+10.+11.+11.+13.+13.+14.+14.+16.+16.+19.+19.+20.+21.-22.+mar1.+mar2[7]/46.XX[9]                                                                                                                                           | 1 | 0 | 0 | 1 | 2.0 | 1 | 85   | 1 | 44   | 0 | 0 |
| 987089 | F | 64 | 3  | RAEB   | 56-58.XX.+X.+del(3)(p12).del(5)(q13q33).+6.+8.+der(8)add(8q22).+10.+11.+13.+14.-17.+19.+21.+mar[cp20]                                                                                                                                                                                              | 1 | 0 | 0 | 1 | 2.0 | 1 | 762  | 1 | 678  | 0 | 0 |
| 988428 | M | 70 | 2  | RAR    | 47.XY.-9.+2mar[1]/46.XY[19]                                                                                                                                                                                                                                                                        | 0 | 0 | 0 | 0 | 0.5 | 1 | 1975 | 0 | 1891 | 1 | 0 |
| 989739 | M | 71 | 18 | RAEB   | 46.XY.del(7)(q21)[11]/47.XY.+8[5]/46.XY[4]                                                                                                                                                                                                                                                         | 0 | 0 | 1 | 1 | 3.0 | 1 | 468  | 1 | 125  | 1 | 1 |
| 994096 | M | 72 | 3  | RA     | 46.XY.del(5)(q14q34).+8.del(11)(q21q23)[19]/46.idem.del(17)(q24)[1]                                                                                                                                                                                                                                | 1 | 0 | 0 | 1 | 1.0 | 1 | 1307 | 0 | 1178 | 0 | 0 |
| 999103 | F | 66 | 6  | RAEB   | 46.XX.del(5)(q15q13)[20]                                                                                                                                                                                                                                                                           | 1 | 0 | 0 | 0 | 1.0 | 1 | 4813 | 0 | 2839 | 0 | 0 |
| 01-13  | F | 41 | 12 | RAEB   | 46.XX.inv(3)(q21q26)[13]/46.idem.t(14;17)(q13;p13)[1]                                                                                                                                                                                                                                              | 0 | 0 | 0 | 0 | 2.0 | 1 | 1649 | 1 | 1301 | 0 | 0 |
| 02-21  | M | 57 | 3  | RA     | 46.XY.t(3;12)(q27;p13)[20]                                                                                                                                                                                                                                                                         | 0 | 0 | 0 | 0 | 1.0 | 1 | 709  | 0 | 709  | 0 | 0 |
| 02-28  | M | 60 | 1  | RA     | 46.XY.t(5;15)(p10;q10)[2]/46.XY[18]                                                                                                                                                                                                                                                                | 0 | 0 | 0 | 0 | 1.0 | 1 | 76   | 0 | 76   | 0 | 0 |
| 02-30  | M | 72 | 2  | RA     | 46-48.XY.add(5)(q11.2).-7oradd(7)(q11.2).add(8)(p22).del(13)(q21).add(16)(q722).del(22)(q12).+1-3mar[cp19]/46.XY[1]                                                                                                                                                                                | 0 | 0 | 1 | 0 | 1.5 | 1 | 239  | 1 | 205  | 0 | 0 |
| 02-75  | F | 46 | 10 | RAEB   | 46.XX[20]                                                                                                                                                                                                                                                                                          | 0 | 0 | 0 | 0 | 0.5 | 0 | 3247 | 0 | 3014 | 0 | 0 |
| 02-77  | M | 67 | 28 | RAEB-T | 46.XY[20]                                                                                                                                                                                                                                                                                          | 0 | 0 | 0 | 0 | 2.0 | 1 | 1863 | 1 | 1662 | 0 | 0 |
| 02-86  | M | 53 | 21 | RAEB-T | 92-<4n>.XXYY.del(4)(q33)x2.del(5)(q13).add(11)(q23)x2[cp8]/46.XY[12]                                                                                                                                                                                                                               | 1 | 0 | 0 | 0 | 3.0 | 1 | 308  | 1 | 133  | 0 | 1 |
| 02-99  | M | 66 | 16 | RAEB   | 46.XY.del(2)(q33).del(5)(q15q33).-7.+del(11)(q273)[cp6]                                                                                                                                                                                                                                            | 1 | 0 | 1 | 0 | 3.0 | 1 | 945  | 0 | 933  | 0 | 0 |

| Supplementary Table 8. Primers used for U2AF1 sequencing.               |            |       |            |           |                                               |                                               |                                                                    |
|-------------------------------------------------------------------------|------------|-------|------------|-----------|-----------------------------------------------|-----------------------------------------------|--------------------------------------------------------------------|
| Ensembl TranscriptID                                                    | Chromosome | Exon# | Exon Start | Exon Stop | Primer 1 Sequence*                            | Primer 2 Sequence                             | Ensembl ExonIDs                                                    |
| <b>gDNA primers: targets U2AF1 hotspot only</b>                         |            |       |            |           |                                               |                                               |                                                                    |
| ENST00000398137                                                         | 21         | 2     | 43397494   | 43397581  | tgctactctAAACAAACCTGGTAAACGTCG                | acatgatgcaAATTTGATAGTGTATGTCATGCTGCTG         | ENSE00001531800                                                    |
| ENST00000398137                                                         | 21         | 2     | 43397494   | 43397581  | acgactacagAAACAAACCTGGTAAACGTCG               | tgctgatgcaAATTTGATAGTGTATGTCATGCTGCTG         | ENSE00001531800                                                    |
| ENST00000398137                                                         | 21         | 2     | 43397494   | 43397581  | cgtgactagAAACAAACCTGGTAAACGTCG                | gcatctgacAATTTGATAGTGTATGTCATGCTGCTG          | ENSE00001531800                                                    |
| ENST00000398137                                                         | 21         | 2     | 43397494   | 43397581  | taacgatgatAAACAAACCTGGTAAACGTCG               | atgctcacaAATTTGATAGTGTATGTCATGCTGCTG          | ENSE00001531800                                                    |
| ENST00000398137                                                         | 21         | 2     | 43397494   | 43397581  | tactctggtAAACAAACCTGGTAAACGTCG                | atgagagcacAATTTGATAGTGTATGTCATGCTGCTG         | ENSE00001531800                                                    |
| ENST00000398137                                                         | 21         | 2     | 43397494   | 43397581  | tagagacagAAACAAACCTGGTAAACGTCG                | atctctgctcAATTTGATAGTGTATGTCATGCTGCTG         | ENSE00001531800                                                    |
| ENST00000398137                                                         | 21         | 2     | 43397494   | 43397581  | tcgtctgctAAACAAACCTGGTAAACGTCG                | agcagcagcAATTTGATAGTGTATGTCATGCTGCTG          | ENSE00001531800                                                    |
| ENST00000398137                                                         | 21         | 2     | 43397494   | 43397581  | acatacagctAAACAAACCTGGTAAACGTCG               | tgatgacgcaAATTTGATAGTGTATGTCATGCTGCTG         | ENSE00001531800                                                    |
| ENST00000398137                                                         | 21         | 2     | 43397494   | 43397581  | acgcgactatAAACAAACCTGGTAAACGTCG               | tgctcgataAATTTGATAGTGTATGTCATGCTGCTG          | ENSE00001531800                                                    |
| ENST00000398137                                                         | 21         | 2     | 43397494   | 43397581  | actactatgtAAACAAACCTGGTAAACGTCG               | tgatgatacaAATTTGATAGTGTATGTCATGCTGCTG         | ENSE00001531800                                                    |
| ENST00000398137                                                         | 21         | 2     | 43397494   | 43397581  | actgacagtAAACAAACCTGGTAAACGTCG                | tgacatgcaAATTTGATAGTGTATGTCATGCTGCTG          | ENSE00001531800                                                    |
| ENST00000398137                                                         | 21         | 2     | 43397494   | 43397581  | agacataactAAACAAACCTGGTAAACGTCG               | tcgtgatgaAATTTGATAGTGTATGTCATGCTGCTG          | ENSE00001531800                                                    |
| ENST00000398137                                                         | 21         | 2     | 43397494   | 43397581  | agrcctgctAAACAAACCTGGTAAACGTCG                | tcgcagcagaAATTTGATAGTGTATGTCATGCTGCTG         | ENSE00001531800                                                    |
| ENST00000398137                                                         | 21         | 2     | 43397494   | 43397581  | agtcactatAAACAAACCTGGTAAACGTCG                | tcactcgataAATTTGATAGTGTATGTCATGCTGCTG         | ENSE00001531800                                                    |
| ENST00000398137                                                         | 21         | 2     | 43397494   | 43397581  | atagatgactAAACAAACCTGGTAAACGTCG               | tatctcatgaAATTTGATAGTGTATGTCATGCTGCTG         | ENSE00001531800                                                    |
| ENST00000398137                                                         | 21         | 2     | 43397494   | 43397581  | caagctacgAAACAAACCTGGTAAACGTCG                | gtagcagcaAATTTGATAGTGTATGTCATGCTGCTG          | ENSE00001531800                                                    |
| ENST00000398137                                                         | 21         | 2     | 43397494   | 43397581  | cgactagcgtAAACAAACCTGGTAAACGTCG               | gctcatcgcaAATTTGATAGTGTATGTCATGCTGCTG         | ENSE00001531800                                                    |
| ENST00000398137                                                         | 21         | 2     | 43397494   | 43397581  | cgactgagcaAAACAAACCTGGTAAACGTCG               | gctgcaactgaAATTTGATAGTGTATGTCATGCTGCTG        | ENSE00001531800                                                    |
| ENST00000398137                                                         | 21         | 2     | 43397494   | 43397581  | taacacacactAAACAAACCTGGTAAACGTCG              | atgtgtgtgaAATTTGATAGTGTATGTCATGCTGCTG         | ENSE00001531800                                                    |
| ENST00000398137                                                         | 21         | 2     | 43397494   | 43397581  | taacagtgatAAACAAACCTGGTAAACGTCG               | atgtgcaactAATTTGATAGTGTATGTCATGCTGCTG         | ENSE00001531800                                                    |
| ENST00000398137                                                         | 21         | 2     | 43397494   | 43397581  | taacagatgtAAACAAACCTGGTAAACGTCG               | atgtctagcaAATTTGATAGTGTATGTCATGCTGCTG         | ENSE00001531800                                                    |
| ENST00000398137                                                         | 21         | 2     | 43397494   | 43397581  | taacgtgctAAACAAACCTGGTAAACGTCG                | atgagcagagaAATTTGATAGTGTATGTCATGCTGCTG        | ENSE00001531800                                                    |
| ENST00000398137                                                         | 21         | 2     | 43397494   | 43397581  | taactgtatAAACAAACCTGGTAAACGTCG                | atcacatcaAATTTGATAGTGTATGTCATGCTGCTG          | ENSE00001531800                                                    |
| ENST00000398137                                                         | 21         | 2     | 43397494   | 43397581  | tgactacagAAACAAACCTGGTAAACGTCG                | agctagtgaAATTTGATAGTGTATGTCATGCTGCTG          | ENSE00001531800                                                    |
| ENST00000398137                                                         | 21         | 2     | 43397494   | 43397581  | tcgcactgtAAACAAACCTGGTAAACGTCG                | agcgtgatcaAATTTGATAGTGTATGTCATGCTGCTG         | ENSE00001531800                                                    |
| <b>cDNA primers: targets U2AF1 hotspot only</b>                         |            |       |            |           |                                               |                                               |                                                                    |
| ENST00000398137                                                         | 21         | 1-4   | 43393632   | 43400757  | acaggtgctGGAGTATCTGGCCTCCATCTTC               | tgctcagcaGTCAGCAGACTGGGAAGAGTTT               | ENSE00001582950, ENSE00001531800, ENSE00001531797, ENSE00001531794 |
| ENST00000398137                                                         | 21         | 1-4   | 43393632   | 43400757  | acgctcgacaGGAGTATCTGGCCTCCATCTTC              | tgtagctgtGTCAGCAGACTGGGAAGAGTTT               | ENSE00001582950, ENSE00001531800, ENSE00001531797, ENSE00001531794 |
| ENST00000398137                                                         | 21         | 1-4   | 43393632   | 43400757  | agacgcactcGGAGTATCTGGCCTCCATCTTC              | tcctgctgagGTCAGCAGACTGGGAAGAGTTT              | ENSE00001582950, ENSE00001531800, ENSE00001531797, ENSE00001531794 |
| ENST00000398137                                                         | 21         | 1-4   | 43393632   | 43400757  | agcactgtgGGAGTATCTGGCCTCCATCTTC               | tcgtgacatGTCAGCAGACTGGGAAGAGTTT               | ENSE00001582950, ENSE00001531800, ENSE00001531797, ENSE00001531794 |
| ENST00000398137                                                         | 21         | 1-4   | 43393632   | 43400757  | atcagacagGGAGTATCTGGCCTCCATCTTC               | tagctgtgctGTCAGCAGACTGGGAAGAGTTT              | ENSE00001582950, ENSE00001531800, ENSE00001531797, ENSE00001531794 |
| ENST00000398137                                                         | 21         | 1-4   | 43393632   | 43400757  | atatcgcagGGAGTATCTGGCCTCCATCTTC               | tatagcctcGTCAGCAGACTGGGAAGAGTTT               | ENSE00001582950, ENSE00001531800, ENSE00001531797, ENSE00001531794 |
| ENST00000398137                                                         | 21         | 1-4   | 43393632   | 43400757  | cgltgctcaGGAGTATCTGGCCTCCATCTTC               | gcacagagatGTCAGCAGACTGGGAAGAGTTT              | ENSE00001582950, ENSE00001531800, ENSE00001531797, ENSE00001531794 |
| ENST00000398137                                                         | 21         | 1-4   | 43393632   | 43400757  | ctcgcgtgctGGAGTATCTGGCCTCCATCTTC              | gagcgcagGTCAGCAGACTGGGAAGAGTTT                | ENSE00001582950, ENSE00001531800, ENSE00001531797, ENSE00001531794 |
| ENST00000398137                                                         | 21         | 1-4   | 43393632   | 43400757  | taqtacagGGAGTATCTGGCCTCCATCTTC                | atcatatcgGTCAGCAGACTGGGAAGAGTTT               | ENSE00001582950, ENSE00001531800, ENSE00001531797, ENSE00001531794 |
| <b>3730 recurrent screening primers: targets all U2AF1 coding exons</b> |            |       |            |           |                                               |                                               |                                                                    |
| ENST00000398137                                                         | 21         | 9     | 43386136   | 43386428  | tgtaaacgacgcccagITGAGAGAGTGGGTGGTTCTG         | caggaaacagctatgaccCCCTTATGAACCTGGTTGGTCAAT    | ENSE00001138177                                                    |
| ENST00000398137                                                         | 21         | 9     | 43386136   | 43386428  | tgtaaacgacgcccagIGAGAGTGGGTGGTTCTGTGC         | caggaaacagctatgaccTCTTACGATCTCTCGACCG         | ENSE00001138177                                                    |
| ENST00000398137                                                         | 21         | 8     | 43387650   | 43387742  | tgtaaacgacgcccagITAACCGTTGGTTAATGGACAGCC      | caggaaacagctatgaccGAGGGTTGTGAGGGGAGAAAGAA     | ENSE00001268168                                                    |
| ENST00000398137                                                         | 21         | 7     | 43387834   | 43387967  | tgtaaacgacgcccagITAACCGTTGGTTAATGGACAGCC      | caggaaacagctatgaccGAGGGTTGTGAGGGGAGAAAGAA     | ENSE00001050518                                                    |
| ENST00000398137                                                         | 21         | 7     | 43387834   | 43387967  | tgtaaacgacgcccagITAAAGTCTTATAAAGCGTGGATGCC    | caggaaacagctatgaccCACTACTGACGGGAGCAGCC        | ENSE00001050518                                                    |
| ENST00000398137                                                         | 21         | 6     | 43388617   | 43388715  | tgtaaacgacgcccagITGATCTTCTGTATCTGTTGGAAAG     | caggaaacagctatgaccCACTGCTCGCTTTTCGCTG         | ENSE00001050529                                                    |
| ENST00000398137                                                         | 21         | 5     | 43388873   | 43388922  | tgtaaacgacgcccagICTGTGTGTTACTGTAGCAGTTTGAAG   | caggaaacagctatgaccACCTCCTGAAGGGAGACCACAG      | ENSE00001531791                                                    |
| ENST00000398137                                                         | 21         | 4     | 43393632   | 43393698  | tgtaaacgacgcccagITAACTCAACTGAAGCACTTGCC       | caggaaacagctatgaccCCTTGCCACCTCTATGTAACCG      | ENSE00001531794                                                    |
| ENST00000398137                                                         | 21         | 3     | 43394545   | 43394611  | tgtaaacgacgcccagIGCCATTTGCAACAATAATGTCTCT     | caggaaacagctatgaccCAGCAGCTCAGAACCAACAT        | ENSE00001531797                                                    |
| ENST00000398137                                                         | 21         | 2     | 43397494   | 43397581  | tgtaaacgacgcccagITGAACACAAATGGAAATACAACACTACG | caggaaacagctatgaccTTCAAAATGGAGCATGCTGCTC      | ENSE00001531800                                                    |
| ENST00000398137                                                         | 21         | 2     | 43397494   | 43397581  | tgtaaacgacgcccagITAAACAAACCTGGTAAACGTCG       | caggaaacagctatgaccAATTTGATAGTGTATGTCATGCTGCTG | ENSE00001531800                                                    |
| ENST00000398137                                                         | 21         | 1     | 43400630   | 43400757  | tgtaaacgacgcccagITAGAGCGTCTGCTCGCTCCG         | caggaaacagctatgaccCCACCCTCAACCAACC            | ENSE00001582950                                                    |
| <b>U2AF1 mRNA isoform expression primers</b>                            |            |       |            |           |                                               |                                               |                                                                    |
|                                                                         |            |       |            |           | GCCTCCATCTTCCGACCCGA                          | GGCATGGCTCAGAATCGCCC                          |                                                                    |
| <b>*lower case, bar code; upper case,U2AF1 sequence</b>                 |            |       |            |           |                                               |                                               |                                                                    |

Supplementary Table 9. Expression of Tier 1 mutated genes in sAML sample.

| Chromosome | Position* | Gene name       | Transcript ID   | Exons | Mutant Exon | Total Probes | Present Probes |                 |             |                 | Probes in Mutant Exon | Present Probes in Mutant Exon |                 |                 |                 |
|------------|-----------|-----------------|-----------------|-------|-------------|--------------|----------------|-----------------|-------------|-----------------|-----------------------|-------------------------------|-----------------|-----------------|-----------------|
|            |           |                 |                 |       |             |              | in UPN         | in > 50% of AML | in > 75% of | in > 90% of AML |                       | in UPN                        | in > 50% of AML | in > 75% of AML | in > 90% of AML |
|            |           |                 |                 |       |             |              | 266395         | samples         | AML samples | samples         |                       | 266395                        | samples         | samples         | samples         |
| 1          | 112325945 | KCND3           | NM_004980       | 8     | 2           | 20           | 3              | 2               | 2           | 1               | 3                     | 0                             | 0               | 0               | 0               |
| 1          | 205309412 | PKFFB2          | NM_006212       | 15    | 11          | 29           | 2              | 15              | 9           | 4               | 1                     | 0                             | 1               | 0               | 0               |
| 1          | 229096537 | ENSG00000222671 | ENST00000410739 | NA    | NA          | NA           | NA             | NA              | NA          | NA              | NA                    | NA                            | NA              | NA              | NA              |
| 2          | 20289990  | LOC100131373    | XM_001720891    | 1     | 1           | 3            | 1              | 3               | 1           | 1               | 1                     | 1                             | 1               | 0               | 0               |
| 2          | 61569230  | XPO1            | NM_003400       | 25    | 18          | 38           | 31             | 33              | 33          | 33              | 1                     | 1                             | 1               | 1               | 1               |
| 3          | 173529456 | FNDC3B          | NM_022763       | 25    | 11          | 43           | 41             | 43              | 43          | 42              | 2                     | 2                             | 2               | 2               | 2               |
| 5          | 50152869  | PARP8           | NM_024615       | 26    | 16          | 31           | 28             | 30              | 29          | 27              | 1                     | 1                             | 1               | 1               | 1               |
| 5          | 148880083 | CSNK1A1         | NM_001025105    | 11    | 4           | 26           | 24             | 25              | 24          | 24              | 1                     | 1                             | 1               | 1               | 1               |
| 6          | 105713110 | POPDC3          | NM_022361       | 4     | 4           | 13           | 0              | 1               | 0           | 0               | 3                     | 0                             | 0               | 0               | 0               |
| 9          | 89535224  | CTSL1           | NM_001912       | 8     | 7           | 20           | 9              | 11              | 5           | 5               | 1                     | 1                             | 1               | 1               | 1               |
| 9          | 138867831 | MAMDC4          | NM_206920       | 27    | 4           | 49           | 12             | 13              | 11          | 9               | 1                     | 0                             | 0               | 0               | 0               |
| 9          | 139117274 | MAN1B1          | ENST00000371587 | 9     | 9           | 45           | 17             | 21              | 17          | 15              | 8                     | 5                             | 6               | 5               | 5               |
| 10         | 82288101  | SH2D4B          | NM_207372       | 7     | 1           | 17           | 4              | 6               | 4           | 1               | 1                     | 0                             | 0               | 0               | 0               |
| 11         | 22340860  | SLC17A6         | NM_020346       | 12    | splice_site | 15           | 2              | 2               | 0           | 0               | NA                    | NA                            | NA              | NA              | NA              |
| 11         | 30881639  | DCDC5           | ENST00000406071 | 15    | 12          | 54           | 3              | 3               | 3           | 2               | 2                     | 0                             | 0               | 0               | 0               |
| 14         | 75418958  | TTL5            | NM_015072       | 32    | 30          | 50           | 41             | 45              | 44          | 40              | 2                     | 2                             | 2               | 2               | 2               |
| 16         | 7716860   | ENSG00000209555 | ENST00000386820 | NA    | NA          | NA           | NA             | NA              | NA          | NA              | NA                    | NA                            | NA              | NA              | NA              |
| 16         | 63589987  | CDH11           | NM_001797       | 13    | 4           | 28           | 5              | 8               | 4           | 4               | 2                     | 0                             | 0               | 0               | 0               |
| 17         | 5288451   | DHX33           | NM_020162       | 12    | 12          | 17           | 6              | 13              | 11          | 7               | 1                     | 0                             | 0               | 0               | 0               |
| 17         | 7696343   | JMJD3           | NM_001080424    | 22    | 19          | 44           | 19             | 27              | 22          | 21              | 1                     | 0                             | 0               | 0               | 0               |
| 17         | 29981226  | TMEM132E        | NM_207313       | 10    | 6           | 13           | 4              | 3               | 2           | 2               | 1                     | 0                             | 0               | 0               | 0               |
| 17         | 75696250  | GAA             | NM_000152       | 20    | 5           | 27           | 5              | 6               | 4           | 2               | 1                     | 0                             | 0               | 0               | 0               |
| 18         | 46165704  | C18orf24        | NM_001039535    | 7     | 5           | 14           | 3              | 6               | 2           | 2               | 1                     | 0                             | 1               | 0               | 0               |
| 19         | 53579461  | KDELRL1         | NM_006801       | 5     | 4           | 12           | 7              | 8               | 8           | 6               | 2                     | 1                             | 2               | 2               | 1               |
| 19         | 54349852  | HRC             | NM_002152       | 6     | 1           | 16           | 1              | 3               | 3           | 2               | 9                     | 1                             | 2               | 2               | 2               |
| 20         | 32728482  | PIGU            | NM_080476       | 12    | 1           | 18           | 16             | 16              | 15          | 12              | 1                     | 1                             | 1               | 1               | 0               |
| 20         | 32965857  | ACSS2           | NM_018677       | 18    | 7           | 28           | 18             | 16              | 11          | 7               | 2                     | 1                             | 1               | 1               | 0               |
| 20         | 51626823  | ZNF217          | NM_006526       | 5     | 3           | 15           | 15             | 15              | 15          | 12              | 5                     | 5                             | 5               | 5               | 5               |
| 21         | 42402818  | UMODL1          | NM_173568       | 22    | 10          | 28           | 4              | 5               | 4           | 4               | 1                     | 0                             | 0               | 0               | 0               |
| 21         | 43397525  | U2AF1           | NM_001025203    | 8     | 2           | 22           | 18             | 22              | 22          | 20              | 1                     | 1                             | 1               | 1               | 1               |

\*using NCBI Build 36. NA, not available.



## Supplementary References

1. Mardis, E.R. et al. Recurring mutations found by sequencing an acute myeloid leukemia genome. *N Engl J Med* **361**, 1058-66 (2009).
2. Kralovicova, J. & Vorechovsky, I. Allele-specific recognition of the 3' splice site of INS intron 1. *Hum Genet* **128**, 383-400 (2010).
3. Graubert, T.A. et al. Integrated genomic analysis implicates haploinsufficiency of multiple chromosome 5q31.2 genes in de novo myelodysplastic syndromes pathogenesis. *PLoS ONE* **4**, e4583 (2009).
4. Tusher, V.G., Tibshirani, R. & Chu, G. Significance analysis of microarrays applied to the ionizing radiation response. *Proc Natl Acad Sci U S A* **98**, 5116-21 (2001).
5. Subramanian, A. et al. Gene set enrichment analysis: a knowledge-based approach for interpreting genome-wide expression profiles. *Proc Natl Acad Sci U S A* **102**, 15545-50 (2005).
6. Dennis, G., Jr. et al. DAVID: Database for Annotation, Visualization, and Integrated Discovery. *Genome Biol* **4**, P3 (2003).
